# Supplementary material for: A novel signature constructed by super-enhancer-related genes for the prediction of prognosis in hepatocellular carcinoma and associated with immune infiltration
Source: Front Oncol. 2023 Feb 9;13:1043203. doi: 10.3389/fonc.2023.1043203 (PMC9948016; doi:10.3389/fonc.2023.1043203)
Supplement: Supplementary file 3 [file DataSheet_2.xlsx]

## Sheet: DEGs
Table S1. Differentially expressed genes of TCGA-LIHC database
symbol	log2FoldChange	pvalue	padj	DEGs
MARCH4	3.84671	2.1672e-29	6.6526e-28	up
MARCH10	1.65019	0.00130496	0.00262138	up
DEC1	1.61905	2.6626e-05	6.8635e-05	up
A1BG	-1.22653	4.34404e-08	1.60108e-07	down
A1CF	-1.00855	2.17542e-14	1.66028e-13	down
A2M	-1.00641	2.90442e-06	1.00523e-05	down
AACS	1.00777	2.77435e-15	2.32665e-14	up
AACSP1	3.95297	1.90533e-08	9.08643e-08	up
AADAT	-2.79845	2.20578e-39	1.40989e-37	down
AANAT	1.64886	2.58681e-08	9.77002e-08	up
AATK	1.33104	1.24436e-07	4.33007e-07	up
AATK-AS1	2.68393	0.000154153	0.000357184	up
ABAT	-1.61004	2.68525e-18	3.01951e-17	down
ABCA1	-1.00282	1.52145e-16	1.98926e-15	down
ABCA12	1.42268	5.25949e-05	0.000129972	up
ABCA17P	1.68234	3.55554e-10	2.13964e-09	up
ABCA3	1.3999	1.71028e-11	9.48416e-11	up
ABCA4	1.1682	9.13212e-09	3.64666e-08	up
ABCA8	-1.48376	4.10249e-09	1.71063e-08	down
ABCB5	5.16967	1.38154e-20	1.93405e-19	up
ABCC10	1.36598	6.84337e-44	5.73162e-42	up
ABCC12	1.6374	0.00220335	0.00426811	up
ABCC4	1.6029	7.26562e-13	4.69811e-12	up
ABCC5	1.09611	8.52821e-32	3.22396e-30	up
ABCC8	1.91667	2.30541e-08	8.7714e-08	up
ABCC9	-1.55592	8.87046e-13	5.68101e-12	down
ABHD11-AS1	1.15215	0.000393036	0.000957687	up
ABHD2	-1.01025	4.91718e-13	4.24065e-12	down
ABHD6	-1.06967	5.80345e-15	4.71236e-14	down
ABLIM2	1.46611	3.22138e-13	2.16666e-12	up
ABLIM3	-1.04448	1.92177e-12	1.17686e-11	down
AC000067.1	2.49212	3.70483e-12	2.89122e-11	up
AC002091.1	-1.13654	1.19906e-07	5.11295e-07	down
AC002091.2	-1.09419	6.60515e-06	2.16514e-05	down
AC002094.4	1.31881	0.00024938	0.000630214	up
AC002116.2	1.4429	9.45668e-15	1.00779e-13	up
AC002128.1	1.39731	2.61878e-14	2.64384e-13	up
AC002351.1	2.90907	3.39685e-06	1.16595e-05	up
AC002378.1	2.4719	7.1597e-07	2.73167e-06	up
AC002384.1	2.54944	1.92703e-05	5.85005e-05	up
AC002401.4	1.16096	0.010678	0.0197011	up
AC002454.1	1.6796	3.77566e-06	1.28645e-05	up
AC002463.1	1.95768	0.0280352	0.0473202	up
AC002511.1	1.73359	0.00171204	0.003721	up
AC002519.2	-1.01735	0.000969111	0.00221012	down
AC002550.2	1.13654	2.01744e-10	1.25705e-09	up
AC003002.3	1.78017	1.03968e-06	3.21229e-06	up
AC003102.1	1.53697	1.46803e-21	3.32248e-20	up
AC003982.1	2.57743	1.15538e-07	4.93405e-07	up
AC003985.2	3.84916	1.07183e-05	3.38687e-05	up
AC003988.1	-2.26434	3.63889e-07	1.45373e-06	down
AC004000.1	1.58065	4.84497e-05	0.000137986	up
AC004034.1	1.16651	5.83144e-05	0.000163857	up
AC004039.1	1.13393	0.000246111	0.000622743	up
AC004053.1	-2.31697	0.000338839	0.000836152	down
AC004076.2	1.36009	4.94155e-13	4.25981e-12	up
AC004080.1	2.22408	0.00425046	0.00853216	up
AC004080.2	5.71561	3.81286e-31	2.15367e-29	up
AC004160.1	-2.36164	4.14884e-13	3.61397e-12	down
AC004160.2	-2.04305	3.35035e-07	1.34612e-06	down
AC004221.1	2.27896	1.433e-06	5.1988e-06	up
AC004231.1	1.86952	2.43023e-05	7.27571e-05	up
AC004233.2	1.33387	0.00164619	0.00325436	up
AC004253.1	1.17492	2.99487e-09	1.58732e-08	up
AC004253.2	2.09072	1.4871e-06	5.38038e-06	up
AC004263.2	2.23816	3.35316e-16	4.23156e-15	up
AC004466.1	1.05964	0.000108472	0.000292668	up
AC004466.2	1.40469	0.000627667	0.0014781	up
AC004466.3	1.33796	0.000401879	0.000977378	up
AC004477.1	2.79674	7.78848e-44	1.05643e-41	up
AC004492.1	1.05293	5.87066e-10	3.44077e-09	up
AC004540.2	-2.41159	2.45452e-12	1.96234e-11	down
AC004593.1	1.20888	8.67355e-05	0.00023759	up
AC004594.1	1.04843	0.000191936	0.000495663	up
AC004596.1	1.22909	9.10883e-06	2.91293e-05	up
AC004687.1	1.18029	2.5707e-06	8.96418e-06	up
AC004775.1	1.28239	0.000107811	0.000291082	up
AC004801.2	1.33617	7.29222e-09	3.6643e-08	up
AC004816.1	2.04842	6.9485e-26	2.3091e-24	up
AC004835.1	1.95866	0.000366898	0.000899271	up
AC004839.1	1.49833	2.02883e-05	6.14131e-05	up
AC004870.2	4.75065	1.08631e-07	4.65706e-07	up
AC004877.1	1.3778	5.5613e-07	2.15523e-06	up
AC004890.2	1.81634	2.52864e-21	5.60205e-20	up
AC004923.4	1.46324	1.2885e-10	8.19238e-10	up
AC004943.1	1.27793	8.27173e-07	3.11777e-06	up
AC004975.2	1.46091	0.00173752	0.00377022	up
AC004988.1	1.18947	0.000375155	0.000917818	up
AC005005.3	1.07654	2.73801e-08	1.27435e-07	up
AC005020.2	1.01268	0.00602882	0.0108569	up
AC005041.3	1.63144	2.45634e-19	4.44033e-18	up
AC005064.1	-1.88578	2.47703e-06	8.6557e-06	down
AC005089.1	1.75298	1.83387e-19	3.3485e-18	up
AC005091.1	1.35497	7.39097e-05	0.000204622	up
AC005150.1	5.74539	2.85846e-11	1.98726e-10	up
AC005154.1	1.08646	1.26064e-25	4.05417e-24	up
AC005154.5	1.10664	0.00191889	0.00412605	up
AC005162.3	1.11603	4.85644e-05	0.000138273	up
AC005165.1	2.66528	1.27038e-09	7.1433e-09	up
AC005186.1	1.08119	0.00981628	0.0182547	up
AC005197.1	1.19409	0.00880953	0.0165664	up
AC005224.3	-1.27962	6.3939e-06	2.10133e-05	down
AC005253.1	1.0866	2.21233e-14	2.26213e-13	up
AC005256.1	1.98612	0.012239	0.0223065	up
AC005261.3	1.00342	0.00044885	0.00108388	up
AC005264.1	1.89951	5.94904e-11	3.96583e-10	up
AC005304.2	-1.1189	0.00981281	0.0182499	down
AC005307.1	1.90179	0.0269822	0.0457558	up
AC005324.3	3.01584	2.24433e-11	1.22533e-10	up
AC005324.5	1.88209	1.25971e-07	5.35896e-07	up
AC005329.1	1.38395	2.32881e-07	9.56613e-07	up
AC005329.3	1.41508	5.98241e-05	0.000167792	up
AC005332.1	1.9764	9.34348e-16	1.12704e-14	up
AC005332.8	1.57066	5.33573e-38	5.45585e-36	up
AC005357.2	-2.55401	0.000209275	0.000536135	down
AC005363.2	1.84871	6.37768e-07	2.44971e-06	up
AC005381.1	4.15424	1.50265e-11	1.07968e-10	up
AC005387.1	1.12784	5.91573e-07	2.28239e-06	up
AC005387.2	1.9452	1.66902e-10	1.04682e-09	up
AC005391.1	1.18626	0.00800796	0.0151995	up
AC005393.1	2.23866	6.79568e-16	8.30264e-15	up
AC005487.1	1.48709	0.00054578	0.00129891	up
AC005498.2	1.22021	0.00040505	0.000984793	up
AC005519.2	1.06257	3.36369e-08	1.54678e-07	up
AC005534.1	1.19043	1.73997e-07	7.27625e-07	up
AC005537.1	2.96813	2.05562e-07	8.5e-07	up
AC005540.1	1.25382	0.00030545	0.000758829	up
AC005546.1	1.01476	0.00667572	0.012878	up
AC005550.1	1.57129	0.0105453	0.0194831	up
AC005614.1	1.11993	0.000956017	0.00218151	up
AC005618.1	1.88263	7.89544e-12	5.88239e-11	up
AC005670.1	2.83405	2.27724e-14	2.32374e-13	up
AC005695.1	1.2242	0.000493192	0.00118194	up
AC005696.4	2.01193	3.12289e-05	9.18669e-05	up
AC005699.1	1.8008	0.000153971	0.000404057	up
AC005722.2	1.20524	0.00046376	0.00111732	up
AC005722.3	3.86309	1.12665e-08	5.53035e-08	up
AC005725.1	1.92329	4.7476e-05	0.000135367	up
AC005726.4	1.02397	1.59398e-08	7.69178e-08	up
AC005730.2	1.89408	0.000244265	0.000618463	up
AC005740.3	1.09061	0.00165831	0.00361801	up
AC005740.4	1.03476	3.35062e-07	1.34612e-06	up
AC005746.3	1.41866	0.00147677	0.00325362	up
AC005753.1	1.5982	4.8809e-06	1.63536e-05	up
AC005785.1	1.55121	8.53961e-18	1.29582e-16	up
AC005821.1	1.57802	0.00173126	0.00375907	up
AC005828.4	1.06597	0.00838642	0.0158379	up
AC005829.1	2.01183	1.97429e-18	3.24529e-17	up
AC005837.1	1.15455	1.4663e-07	6.19025e-07	up
AC005841.1	1.2493	0.000778835	0.00180237	up
AC005858.1	4.12763	4.29087e-12	3.31868e-11	up
AC005884.1	-1.09706	0.000113351	0.000304965	down
AC005899.6	1.01174	5.45305e-06	1.81003e-05	up
AC005899.7	1.01704	0.000112616	0.000303192	up
AC005911.1	1.07469	5.67761e-08	2.53939e-07	up
AC005954.1	1.10408	0.00159708	0.00349591	up
AC005993.1	2.47959	0.00171421	0.00372472	up
AC006012.1	2.02267	8.42028e-07	3.16957e-06	up
AC006042.1	1.29429	7.05118e-08	3.10018e-07	up
AC006064.1	1.47809	3.17185e-06	1.09323e-05	up
AC006064.3	1.61059	2.62669e-07	1.07082e-06	up
AC006065.4	4.44922	9.12711e-10	5.21598e-09	up
AC006111.3	1.53758	0.00144535	0.0031918	up
AC006205.2	1.87981	6.53433e-07	2.50602e-06	up
AC006206.2	3.61657	2.27309e-08	1.07172e-07	up
AC006213.3	1.93315	1.9012e-08	9.06891e-08	up
AC006213.4	1.02311	1.68244e-07	7.04456e-07	up
AC006213.5	1.11703	3.77416e-05	0.000109395	up
AC006249.1	-1.06482	1.40159e-07	5.93087e-07	down
AC006252.1	2.01406	3.06273e-17	4.35577e-16	up
AC006273.1	1.29667	1.67378e-05	5.13107e-05	up
AC006305.1	3.20987	2.48953e-10	1.5349e-09	up
AC006387.1	-1.0782	0.000173348	0.000450989	down
AC006435.2	1.05268	6.5186e-08	2.88064e-07	up
AC006449.2	1.07581	5.97954e-07	2.30567e-06	up
AC006449.5	1.20859	1.30757e-10	8.30307e-10	up
AC006450.3	-1.74034	0.00277041	0.00577514	down
AC006460.1	2.16649	4.21967e-08	1.91392e-07	up
AC006480.2	1.04738	8.39897e-09	4.18772e-08	up
AC006483.2	2.46004	3.50569e-10	2.11306e-09	up
AC006504.7	-1.84612	0.0224576	0.0387216	down
AC006504.8	1.1421	1.13599e-10	7.27375e-10	up
AC006538.1	2.37806	1.7509e-19	3.20876e-18	up
AC006557.1	2.10722	3.7573e-08	1.71631e-07	up
AC006946.2	3.43354	3.66861e-10	2.20327e-09	up
AC006946.3	1.53019	0.0176025	0.0310598	up
AC006960.2	-3.943	2.39142e-08	1.12353e-07	down
AC007014.2	1.11981	5.00379e-05	0.000142225	up
AC007036.1	2.47665	2.20501e-08	1.04135e-07	up
AC007038.2	1.06528	3.51049e-13	3.08215e-12	up
AC007040.2	-1.27402	8.69491e-06	2.37925e-05	down
AC007064.2	2.34914	1.66401e-05	5.10206e-05	up
AC007066.2	1.05026	3.20281e-15	3.59982e-14	up
AC007099.1	3.16085	3.41295e-11	2.34577e-10	up
AC007114.2	1.40348	9.94679e-07	3.70431e-06	up
AC007128.1	4.0144	1.33731e-10	8.4757e-10	up
AC007128.2	2.28432	0.00107976	0.00244097	up
AC007192.1	2.02943	5.8531e-08	2.12622e-07	up
AC007218.1	-1.43483	0.00217931	0.00463254	down
AC007255.1	1.54937	0.000125303	0.000334415	up
AC007277.1	3.64653	1.0147e-16	1.36335e-15	up
AC007278.1	-1.22191	7.40386e-05	0.000204922	down
AC007278.2	-1.42467	0.00965436	0.0179922	down
AC007292.1	1.17746	3.06734e-13	2.71459e-12	up
AC007298.2	-1.69419	4.8141e-09	2.47776e-08	down
AC007319.1	-1.03272	1.0997e-09	6.22393e-09	down
AC007342.5	-1.16714	0.00872989	0.0164337	down
AC007349.1	1.50364	0.00229964	0.0048686	up
AC007364.1	-1.24339	5.26296e-12	4.03784e-11	down
AC007376.2	1.23098	0.000342157	0.000843088	up
AC007402.1	2.29364	0.0127977	0.0232082	up
AC007405.1	1.21907	7.53187e-11	4.94332e-10	up
AC007406.2	2.36348	5.94431e-12	4.5238e-11	up
AC007495.1	-1.34673	0.000179496	0.000465648	down
AC007497.1	1.20502	0.000491575	0.00117849	up
AC007552.2	1.19241	0.00235692	0.00497825	up
AC007608.1	1.10889	0.0187396	0.0328916	up
AC007608.3	1.39042	4.17633e-07	1.65255e-06	up
AC007611.1	1.1888	2.81904e-13	2.50596e-12	up
AC007614.3	1.15309	0.000154834	0.000406001	up
AC007614.4	1.54126	0.000232369	0.000591423	up
AC007639.1	4.00958	1.82024e-18	2.99949e-17	up
AC007663.3	1.33015	4.66085e-09	2.40247e-08	up
AC007687.1	2.14284	3.59499e-08	1.64707e-07	up
AC007743.1	1.41853	2.41587e-08	1.13421e-07	up
AC007750.1	2.08663	4.31626e-08	1.95414e-07	up
AC007773.1	1.57437	2.57215e-15	2.93567e-14	up
AC007785.3	1.85738	1.02237e-07	4.39617e-07	up
AC007848.1	2.81974	4.00206e-05	0.000115581	up
AC007879.3	1.12578	1.87673e-05	5.70864e-05	up
AC007879.4	1.08176	0.00613331	0.011917	up
AC007881.2	-1.88288	0.00128333	0.0028632	down
AC007906.2	-2.51311	1.97551e-26	4.61372e-25	down
AC007952.2	1.01775	0.0254153	0.0432866	up
AC007952.4	1.07967	0.0294782	0.0495628	up
AC007966.1	1.78631	5.94893e-07	2.29431e-06	up
AC007991.3	-1.6137	0.000586167	0.00138824	down
AC007998.2	2.03785	2.56338e-07	8.55974e-07	up
AC007998.3	1.412	1.47884e-09	8.2457e-09	up
AC007998.4	1.29946	0.0022829	0.00483779	up
AC008013.1	1.04797	0.00228694	0.00484532	up
AC008033.3	1.9636	1.21354e-06	4.44549e-06	up
AC008060.1	4.05313	3.80823e-07	1.51713e-06	up
AC008060.4	3.22734	0.00012707	0.000338632	up
AC008073.2	1.00119	0.00294471	0.00609958	up
AC008080.1	-2.24969	9.13861e-21	1.93024e-19	down
AC008080.4	-1.17624	0.00219652	0.00466514	down
AC008105.1	1.43979	2.3603e-08	1.10969e-07	up
AC008109.1	3.0776	5.70537e-12	4.3586e-11	up
AC008125.1	-1.00105	0.0017617	0.00381768	down
AC008132.1	1.22136	0.012779	0.0231805	up
AC008163.1	1.85214	0.000190922	0.000493235	up
AC008250.2	-1.30197	4.35044e-07	1.71667e-06	down
AC008403.3	1.58435	7.06428e-05	0.000196322	up
AC008434.1	1.2394	0.000452848	0.00109261	up
AC008440.3	1.17154	0.00231962	0.00490872	up
AC008443.3	2.83428	3.13958e-06	1.08267e-05	up
AC008443.6	1.09182	0.00118272	0.00266016	up
AC008514.1	1.14636	0.00153408	0.00336947	up
AC008549.1	-1.70808	4.68209e-08	2.11022e-07	down
AC008554.1	2.24942	6.82552e-06	2.23398e-05	up
AC008556.1	-2.02323	5.66664e-30	2.85321e-28	down
AC008567.3	1.08867	1.52384e-06	5.50332e-06	up
AC008592.5	-1.11165	0.000298212	0.000742514	down
AC008610.1	1.77784	7.66526e-16	9.33074e-15	up
AC008622.2	1.6231	2.32794e-08	1.09551e-07	up
AC008655.2	1.30167	2.19887e-05	6.62384e-05	up
AC008659.1	1.62004	0.0040075	0.00809007	up
AC008663.1	-1.92949	0.00214799	0.00457377	down
AC008667.1	1.30869	0.000397619	0.000967789	up
AC008687.4	1.89979	0.000222081	0.000502592	up
AC008735.1	1.25435	2.89218e-07	1.16948e-06	up
AC008735.2	1.30531	9.46383e-14	8.90091e-13	up
AC008736.2	1.13982	0.00135056	0.00300109	up
AC008738.2	1.3788	4.73678e-08	2.13439e-07	up
AC008738.6	1.52933	2.94529e-05	8.70275e-05	up
AC008741.2	1.93487	2.3108e-41	2.82669e-39	up
AC008742.1	1.89926	2.41341e-07	9.89532e-07	up
AC008750.2	1.1523	0.00280728	0.0058465	up
AC008750.3	2.9164	6.79492e-13	5.79238e-12	up
AC008752.1	1.24051	0.00177034	0.00383433	up
AC008752.2	1.25406	0.000973534	0.00221843	up
AC008758.2	1.06278	0.0066292	0.0127945	up
AC008764.8	1.2312	9.04474e-17	1.22266e-15	up
AC008770.1	1.01974	1.95103e-13	1.77551e-12	up
AC008825.1	2.0045	0.00497294	0.00984955	up
AC008870.2	1.20083	8.9749e-14	8.48509e-13	up
AC008870.4	1.5267	3.64857e-06	1.24634e-05	up
AC008875.1	2.55244	1.55145e-14	1.61621e-13	up
AC008878.3	-1.2412	0.0129139	0.0219575	down
AC008892.1	2.1881	2.18919e-06	7.72843e-06	up
AC008906.2	1.27601	0.000140146	0.000370655	up
AC008991.1	3.04003	5.37607e-05	0.000152091	up
AC008991.2	3.20653	5.52006e-06	1.83136e-05	up
AC009005.1	2.18942	1.37603e-24	4.05268e-23	up
AC009014.1	4.40658	4.67253e-21	6.86777e-20	up
AC009041.2	1.10258	2.85859e-06	9.90225e-06	up
AC009063.3	-2.39007	4.31716e-08	1.95414e-07	down
AC009065.1	2.16015	1.04175e-06	3.87095e-06	up
AC009065.4	1.21488	6.21315e-14	6.00795e-13	up
AC009084.1	1.59432	0.000716172	0.00166956	up
AC009088.1	1.09649	3.11957e-05	9.17961e-05	up
AC009093.1	1.1129	9.68153e-06	3.07977e-05	up
AC009093.5	-1.38377	2.14984e-05	6.48595e-05	down
AC009097.2	2.23729	4.12051e-07	1.63338e-06	up
AC009108.3	1.17449	1.06815e-06	3.96018e-06	up
AC009118.2	1.29066	8.56565e-06	2.75246e-05	up
AC009120.6	1.1952	2.98694e-05	8.81797e-05	up
AC009121.1	2.36677	4.30035e-09	2.22829e-08	up
AC009121.2	2.05398	4.59164e-11	3.09928e-10	up
AC009137.2	-1.20047	1.14926e-11	8.3571e-11	down
AC009148.1	2.2405	6.76983e-18	1.03994e-16	up
AC009159.3	-1.29301	2.23761e-14	2.28447e-13	down
AC009226.1	1.03385	1.77437e-05	5.41785e-05	up
AC009264.1	2.33733	0.00114167	0.00257217	up
AC009271.1	3.82422	2.32504e-08	1.0944e-07	up
AC009275.1	2.4997	4.55722e-16	5.66852e-15	up
AC009292.1	2.45441	1.52922e-07	6.4395e-07	up
AC009336.1	1.8279	0.000443744	0.00107286	up
AC009336.2	1.94067	4.12084e-05	0.000103226	up
AC009414.2	1.23835	7.72509e-07	2.93447e-06	up
AC009509.4	-1.21145	6.77908e-12	5.11088e-11	down
AC009549.1	1.59516	3.34666e-11	2.30225e-10	up
AC009686.2	1.10974	9.05861e-08	3.92737e-07	up
AC009690.1	2.24391	4.20909e-14	3.1145e-13	up
AC009690.2	1.28117	1.05426e-22	2.63749e-21	up
AC009831.1	-1.10726	3.27186e-21	7.16897e-20	down
AC009831.4	-1.85331	2.81417e-13	2.50387e-12	down
AC009902.2	1.78439	3.85225e-06	1.31097e-05	up
AC009902.3	1.68541	8.84936e-06	2.83632e-05	up
AC009908.1	1.39653	0.000764433	0.00177151	up
AC009955.3	1.53335	7.04421e-05	0.000195865	up
AC010127.1	1.4628	0.00101435	0.00230406	up
AC010132.4	1.34168	1.22747e-08	5.98839e-08	up
AC010148.1	1.69805	8.33276e-12	6.17646e-11	up
AC010149.1	1.87699	4.3794e-06	1.47651e-05	up
AC010168.2	1.10144	6.67634e-12	5.03859e-11	up
AC010201.1	2.17504	5.744e-12	4.38643e-11	up
AC010201.2	2.09052	1.6787e-24	4.87925e-23	up
AC010247.2	2.17765	1.27463e-10	8.113e-10	up
AC010255.1	2.25808	0.000821157	0.00189459	up
AC010280.1	-2.19734	1.02006e-09	5.79457e-09	down
AC010280.2	-2.59766	1.13053e-16	1.50679e-15	down
AC010300.1	1.68097	6.8793e-18	1.05513e-16	up
AC010307.2	1.24857	0.00957841	0.0178673	up
AC010307.4	2.57556	8.82841e-06	2.83006e-05	up
AC010325.1	1.28138	0.000472235	0.00101346	up
AC010327.4	1.17046	1.84375e-10	1.15207e-09	up
AC010331.1	1.72626	6.71354e-18	1.03288e-16	up
AC010333.1	3.91851	8.97348e-14	8.48509e-13	up
AC010333.2	3.90988	3.28645e-14	3.27806e-13	up
AC010336.1	1.26188	1.56753e-06	5.65191e-06	up
AC010336.2	-1.18797	1.25025e-06	4.5724e-06	down
AC010422.4	1.22011	2.21828e-06	7.82561e-06	up
AC010457.1	2.44808	1.74656e-06	6.26229e-06	up
AC010463.2	1.05935	0.010838	0.0199629	up
AC010463.3	1.47489	5.68568e-08	2.54242e-07	up
AC010487.2	1.4357	0.00023187	0.000590304	up
AC010491.1	1.05257	6.60555e-09	3.33946e-08	up
AC010501.1	1.06507	7.36023e-05	0.000203799	up
AC010524.1	1.52487	0.000119057	0.000319113	up
AC010528.1	2.03011	0.00210419	0.00449153	up
AC010536.1	1.16791	6.9317e-10	4.01893e-09	up
AC010536.3	1.34788	0.000947481	0.00216376	up
AC010542.3	-1.06323	0.000919204	0.00188467	down
AC010542.5	1.22369	2.54002e-12	2.02663e-11	up
AC010547.1	1.28975	1.13928e-05	3.58185e-05	up
AC010547.2	-2.06798	0.000396474	0.000965121	down
AC010595.1	4.67943	7.85926e-13	6.63445e-12	up
AC010615.2	2.45938	3.32044e-15	3.72574e-14	up
AC010616.1	1.80303	7.08868e-06	1.96295e-05	up
AC010618.2	1.38008	1.56239e-07	6.57089e-07	up
AC010624.1	1.1218	3.31936e-06	1.14131e-05	up
AC010624.2	3.64536	3.01986e-08	1.3977e-07	up
AC010643.1	2.24645	9.35655e-13	7.81895e-12	up
AC010719.1	2.82923	2.11181e-46	3.53844e-44	up
AC010735.1	2.68048	3.56479e-11	2.44676e-10	up
AC010737.1	-1.23435	0.00126715	0.00283153	down
AC010761.1	1.06036	3.94553e-12	3.06347e-11	up
AC010776.2	-3.73768	4.32541e-16	5.39027e-15	down
AC010789.1	2.27489	0.0115638	0.0211747	up
AC010809.2	1.19298	4.7322e-11	3.18661e-10	up
AC010864.1	1.63556	1.00416e-20	2.11648e-19	up
AC010890.1	-1.12115	0.000128806	0.000342709	down
AC010894.3	4.7401	4.00271e-23	1.03784e-21	up
AC010904.2	1.18969	0.00478622	0.00951186	up
AC010907.2	1.54988	0.000156621	0.000410147	up
AC010931.2	3.16927	2.83147e-12	2.25016e-11	up
AC010967.1	1.8859	4.32674e-05	0.000124131	up
AC010969.1	-1.89213	2.43408e-06	8.52205e-06	down
AC010973.1	1.88342	1.90692e-08	9.09183e-08	up
AC010973.2	1.80984	2.53723e-30	1.31402e-28	up
AC010980.1	1.45438	0.00112916	0.00254687	up
AC010997.5	2.32299	8.65715e-10	4.95735e-09	up
AC010999.1	1.02307	0.00256142	0.00537487	up
AC010999.2	1.8834	8.96061e-10	5.12523e-09	up
AC011005.4	2.52557	6.55178e-19	1.13007e-17	up
AC011247.1	1.31212	6.44653e-07	2.47378e-06	up
AC011287.1	1.54953	0.00661766	0.0127759	up
AC011294.1	4.53202	4.40801e-36	3.72421e-34	up
AC011306.1	1.71552	0.000477308	0.00114746	up
AC011330.2	1.24177	1.13871e-06	4.19681e-06	up
AC011337.1	1.65764	1.64308e-14	1.70012e-13	up
AC011352.1	2.37908	1.99621e-06	7.09616e-06	up
AC011352.3	2.20082	2.39033e-06	8.38609e-06	up
AC011363.1	1.94736	0.0234479	0.0402313	up
AC011374.1	-1.15011	0.000214907	0.000549574	down
AC011379.2	1.09047	2.98774e-08	1.3838e-07	up
AC011442.1	1.26508	0.000843564	0.00194269	up
AC011445.1	1.14665	0.00147709	0.00325397	up
AC011445.2	2.53221	1.64457e-20	3.39101e-19	up
AC011446.1	1.19937	0.000694899	0.00162403	up
AC011447.3	1.51106	9.6167e-09	4.75918e-08	up
AC011453.1	1.78609	0.000292287	0.000728763	up
AC011461.1	1.34386	1.47438e-08	7.14055e-08	up
AC011462.4	1.96364	4.34399e-19	7.65148e-18	up
AC011466.3	1.85802	6.18613e-08	2.74956e-07	up
AC011468.1	1.34396	3.01337e-15	3.4061e-14	up
AC011481.1	1.53186	4.0319e-11	2.74563e-10	up
AC011487.1	1.95517	1.4503e-08	7.02907e-08	up
AC011489.1	1.14738	2.07587e-12	1.66899e-11	up
AC011498.6	1.77747	1.39115e-13	1.28362e-12	up
AC011503.1	4.69179	3.80294e-20	7.45592e-19	up
AC011503.2	1.27715	5.79022e-08	2.58569e-07	up
AC011511.2	1.09131	0.0173901	0.030704	up
AC011611.3	-1.67096	2.22514e-07	9.1554e-07	down
AC011632.1	5.62165	2.7677e-15	3.14446e-14	up
AC011676.1	2.26651	1.92e-07	7.98061e-07	up
AC011754.1	2.94149	0.00830727	0.0157078	up
AC011767.1	1.65468	0.00227947	0.00483104	up
AC011773.1	1.46642	0.000827577	0.00190874	up
AC011773.4	2.24083	1.64834e-09	9.14224e-09	up
AC011815.1	1.18307	1.43879e-10	9.08424e-10	up
AC011815.2	1.31068	9.60454e-08	4.14913e-07	up
AC011816.2	1.28258	0.000295988	0.000737252	up
AC011840.1	4.0962	2.48969e-05	7.44146e-05	up
AC011921.1	2.34339	8.81383e-19	1.50204e-17	up
AC011933.3	2.13475	2.82096e-09	1.50233e-08	up
AC011944.1	2.24954	2.82936e-08	1.3141e-07	up
AC012055.1	-1.39344	0.0105742	0.0195294	down
AC012073.1	1.14649	9.84588e-09	4.86535e-08	up
AC012074.1	1.22433	2.57327e-06	8.97159e-06	up
AC012146.1	1.56061	4.28753e-17	6.02036e-16	up
AC012213.3	1.28556	7.30464e-08	3.20456e-07	up
AC012236.1	2.50129	3.12459e-20	6.18681e-19	up
AC012313.8	1.57054	1.45774e-15	1.71277e-14	up
AC012354.1	1.58023	0.00448751	0.00896109	up
AC012360.1	1.28242	1.69428e-05	5.18768e-05	up
AC012409.1	-1.66466	7.87704e-12	5.87142e-11	down
AC012414.5	-1.0429	0.00106486	0.00241029	down
AC012435.1	1.21413	3.53999e-10	2.1318e-09	up
AC012462.3	1.27949	0.00188108	0.00405086	up
AC012464.3	1.17621	1.51735e-05	4.68624e-05	up
AC012485.2	1.48918	8.42575e-08	3.67216e-07	up
AC012499.1	1.57263	0.00209013	0.00446438	up
AC012506.2	1.06677	0.00377614	0.00766725	up
AC012510.1	1.09773	5.12962e-10	3.0314e-09	up
AC012613.1	-1.77313	1.29945e-08	6.33492e-08	down
AC012613.2	-1.79801	2.14706e-09	1.1667e-08	down
AC012615.1	1.26748	1.2007e-19	2.24585e-18	up
AC012617.1	2.48575	1.29886e-12	1.06972e-11	up
AC012625.1	2.95334	5.07466e-07	1.98011e-06	up
AC012629.2	-1.19012	1.29672e-06	4.73106e-06	down
AC012640.1	1.76363	2.15226e-07	8.87201e-07	up
AC012645.4	1.64891	3.03417e-10	1.84728e-09	up
AC012653.2	1.11052	0.0120725	0.0220372	up
AC012676.1	1.39291	2.81823e-13	2.50596e-12	up
AC012676.4	1.03854	0.000749128	0.00173907	up
AC013275.1	2.49794	1.26662e-15	1.50239e-14	up
AC013400.1	2.07509	1.11931e-09	6.32771e-09	up
AC013451.2	3.00855	4.94287e-11	3.32174e-10	up
AC013460.1	1.0902	0.0294618	0.0495436	up
AC013470.2	2.34581	1.3178e-05	3.52459e-05	up
AC013472.3	1.11334	0.00014774	0.000388934	up
AC013553.3	2.43984	2.41103e-12	1.92834e-11	up
AC013565.1	1.40719	0.00284138	0.00590519	up
AC013652.1	1.18668	0.000128478	0.00034202	up
AC013731.1	1.95108	2.72277e-19	4.89975e-18	up
AC015468.1	-3.04487	8.48697e-11	5.53012e-10	down
AC015468.3	-1.65649	0.000239286	0.000607245	down
AC015468.4	-2.98667	1.83204e-09	1.00853e-08	down
AC015660.2	1.08261	0.0182527	0.0321013	up
AC015660.3	1.49805	0.00154712	0.0033952	up
AC015660.4	1.54925	1.06057e-06	3.93426e-06	up
AC015802.1	1.12217	0.0193604	0.0338888	up
AC015802.4	1.24886	1.09511e-12	9.08293e-12	up
AC015802.5	1.06285	1.27463e-05	3.97419e-05	up
AC015813.1	1.22879	1.63608e-14	1.69464e-13	up
AC015813.4	1.14078	0.0239989	0.0410707	up
AC015845.2	1.11778	0.00531247	0.0104607	up
AC015849.1	1.25573	0.000590397	0.00139709	up
AC015849.5	1.21173	2.31644e-06	8.14022e-06	up
AC015908.3	-1.38056	1.10145e-14	1.16384e-13	down
AC015912.3	1.22478	3.517e-08	1.61356e-07	up
AC015922.1	1.7051	0.0184039	0.0323536	up
AC015922.3	-1.16255	4.18606e-07	1.65607e-06	down
AC015922.4	-1.02135	7.98116e-09	3.98838e-08	down
AC015961.2	1.29724	1.67908e-06	6.03448e-06	up
AC015969.1	1.38397	0.0171901	0.0303806	up
AC016394.1	1.45461	7.1916e-18	1.10133e-16	up
AC016395.1	-1.01474	0.00020112	0.00051757	down
AC016405.3	1.34196	1.49423e-09	8.32686e-09	up
AC016550.2	4.62472	1.24176e-19	2.31397e-18	up
AC016575.1	1.78307	1.81921e-08	8.71116e-08	up
AC016586.1	1.25321	3.48702e-06	1.19443e-05	up
AC016590.1	2.28421	2.00217e-09	1.09463e-08	up
AC016708.1	1.69327	2.38785e-08	1.12211e-07	up
AC016710.1	5.44095	2.25183e-11	1.58208e-10	up
AC016717.2	4.95133	5.2705e-11	3.53358e-10	up
AC016722.3	1.69572	3.31213e-11	2.2804e-10	up
AC016723.1	1.6337	0.000148637	0.000391089	up
AC016737.1	2.14347	2.0976e-18	3.43665e-17	up
AC016738.1	1.18383	1.58375e-06	5.70623e-06	up
AC016773.1	2.56512	2.42713e-31	1.40274e-29	up
AC016820.1	-1.89253	0.00014556	0.000383855	down
AC016831.5	1.51457	1.21063e-05	3.7893e-05	up
AC016876.3	1.09784	5.23776e-05	0.000148452	up
AC016877.3	3.76096	1.20393e-12	9.9524e-12	up
AC016885.1	1.42736	0.00796754	0.0151314	up
AC016924.1	1.06448	1.31726e-06	4.80075e-06	up
AC016999.1	-2.93178	2.02032e-29	9.73024e-28	down
AC017002.2	2.08141	1.18293e-06	4.34055e-06	up
AC017002.3	2.09991	2.53909e-11	1.77265e-10	up
AC017048.3	1.58157	0.003475	0.00711158	up
AC017076.1	1.61918	0.00118473	0.00266347	up
AC017083.2	1.97928	2.66521e-18	4.28908e-17	up
AC018410.2	1.10024	0.000506753	0.00121182	up
AC018467.1	-1.04904	2.54219e-05	7.58586e-05	down
AC018521.7	1.25362	0.000527551	0.00125869	up
AC018529.1	-1.29084	5.55597e-06	1.84266e-05	down
AC018553.1	2.64509	2.44166e-14	2.48262e-13	up
AC018563.1	1.24822	0.00942388	0.0176104	up
AC018635.2	1.17889	0.00403932	0.00814605	up
AC018638.6	1.52953	7.06404e-08	3.10383e-07	up
AC018638.7	1.14306	7.21444e-09	3.62888e-08	up
AC018648.1	2.05982	2.36263e-11	1.65642e-10	up
AC018695.6	1.2543	0.00865245	0.0163108	up
AC018742.1	-1.13201	0.000349519	0.000859529	down
AC018755.4	-1.57315	8.30048e-08	3.62073e-07	down
AC018809.1	2.59395	2.65285e-23	6.95074e-22	up
AC019080.4	1.36365	0.00399294	0.00806393	up
AC019117.1	1.13121	4.79339e-05	0.000136614	up
AC019117.2	1.18777	0.00479175	0.00952044	up
AC019129.2	1.20795	0.0011398	0.00256884	up
AC019183.1	2.08818	1.4775e-05	4.57239e-05	up
AC019185.2	1.80924	0.000870894	0.00200124	up
AC019193.3	-1.37682	1.68977e-08	8.12449e-08	down
AC019257.1	-1.71813	4.22906e-06	1.43115e-05	down
AC019257.2	-1.82676	0.000104395	0.000282471	down
AC019294.1	1.60721	0.00270215	0.00564228	up
AC019294.2	1.3658	7.47429e-08	3.27322e-07	up
AC020594.1	1.50385	2.00981e-11	1.42054e-10	up
AC020637.1	1.34651	0.029187	0.0491063	up
AC020656.2	1.3977	6.69429e-07	2.56441e-06	up
AC020658.4	2.4945	1.75028e-09	9.66189e-09	up
AC020661.1	1.14956	6.83618e-07	2.61475e-06	up
AC020663.3	1.1528	9.05139e-06	2.89642e-05	up
AC020765.2	1.19845	1.12558e-11	8.19381e-11	up
AC020904.2	1.47518	4.34205e-15	4.82857e-14	up
AC020907.1	1.99473	3.31513e-13	2.91834e-12	up
AC020907.2	-1.44766	0.000554082	0.00131694	down
AC020907.3	1.09515	0.00374595	0.00761216	up
AC020907.4	1.69653	7.81491e-11	5.11393e-10	up
AC020915.3	1.5123	2.54042e-10	1.56531e-09	up
AC020922.3	1.34922	0.000447511	0.00108078	up
AC020922.4	1.90617	3.41288e-05	9.97353e-05	up
AC020928.1	2.65357	7.3019e-12	5.47959e-11	up
AC020934.1	2.7093	8.44977e-08	3.68021e-07	up
AC020978.5	-1.8484	4.85871e-14	4.77701e-13	down
AC021079.1	3.73961	9.85705e-07	3.67295e-06	up
AC021092.1	1.87025	9.70844e-10	5.52445e-09	up
AC021321.1	1.883	3.47686e-13	3.05532e-12	up
AC021491.2	3.01026	8.14271e-16	9.86975e-15	up
AC021546.1	-1.3584	0.0115413	0.0211432	down
AC021660.2	-1.57521	9.39379e-06	2.99493e-05	down
AC021683.2	1.15436	0.00828403	0.0156668	up
AC021739.4	-1.02217	0.00363141	0.00740051	down
AC022007.1	1.30918	7.13377e-19	1.22727e-17	up
AC022028.2	1.87021	0.00190676	0.00410218	up
AC022031.2	3.84917	2.76655e-06	9.59509e-06	up
AC022034.2	1.17101	0.000292183	0.000728595	up
AC022092.1	2.04673	3.33968e-05	9.7725e-05	up
AC022098.2	2.95137	2.76872e-06	9.60095e-06	up
AC022098.3	1.28873	1.2884e-06	4.70331e-06	up
AC022146.2	1.54051	3.27889e-05	9.61296e-05	up
AC022148.1	2.05553	8.13232e-06	2.62252e-05	up
AC022148.2	1.24256	0.00545009	0.0107032	up
AC022150.4	1.54607	2.11924e-07	8.74494e-07	up
AC022154.1	1.45772	3.90641e-11	2.66472e-10	up
AC022167.4	-1.32891	2.75685e-05	8.18963e-05	down
AC022211.1	1.3597	8.34125e-05	0.000229117	up
AC022211.2	1.41435	1.00112e-19	1.88671e-18	up
AC022296.3	2.54094	6.03055e-10	3.5293e-09	up
AC022306.2	1.34651	5.54391e-20	1.07009e-18	up
AC022306.3	1.3141	8.43723e-10	4.83837e-09	up
AC022424.1	5.43399	3.84051e-19	6.8128e-18	up
AC022509.3	1.15748	0.00427276	0.00857211	up
AC022568.1	-2.00693	4.4892e-06	1.51199e-05	down
AC022613.3	1.05631	0.00158334	0.00346888	up
AC022748.2	1.35412	0.00621937	0.0120713	up
AC022784.1	1.05174	5.60053e-06	1.85589e-05	up
AC022809.1	1.71488	9.60096e-09	4.75419e-08	up
AC022893.1	1.098	3.22123e-09	1.70006e-08	up
AC022929.2	1.64869	0.00166428	0.00362746	up
AC023043.4	1.10202	1.55313e-08	7.50371e-08	up
AC023090.1	5.14117	1.72352e-18	2.85663e-17	up
AC023158.1	-2.67853	1.44155e-07	6.09222e-07	down
AC023301.1	1.86517	0.000224017	0.00057148	up
AC023302.1	2.42668	9.07614e-11	5.89092e-10	up
AC023347.1	3.03132	1.81295e-05	5.52645e-05	up
AC023355.1	2.09392	1.06054e-18	1.79204e-17	up
AC023421.1	-1.12711	0.0112934	0.0207138	down
AC023421.2	1.0436	0.022913	0.039405	up
AC023490.3	-2.06669	0.00442081	0.00883852	down
AC023509.3	1.01426	1.41488e-12	8.82588e-12	up
AC023590.1	-1.0281	1.95251e-08	9.2892e-08	down
AC023794.3	-1.28003	5.90757e-10	3.46139e-09	down
AC023794.5	1.12734	0.00725218	0.0138799	up
AC023824.6	3.15504	0.00370046	0.00752433	up
AC023830.2	-1.20529	0.000770019	0.00178362	down
AC023906.5	1.5973	1.35777e-06	4.94025e-06	up
AC023908.3	2.08254	1.38535e-20	2.87734e-19	up
AC023983.2	1.6764	0.000132451	0.000351796	up
AC024230.1	5.104	2.97619e-22	7.16694e-21	up
AC024243.1	1.7175	7.60075e-07	2.89e-06	up
AC024257.3	1.72015	1.10486e-06	4.08034e-06	up
AC024257.5	1.24476	0.0242255	0.0414301	up
AC024361.1	2.20686	4.50313e-27	1.73336e-25	up
AC024361.3	1.14492	4.24045e-05	0.000121848	up
AC024559.1	1.04901	0.00591434	0.0115331	up
AC024560.1	1.66872	5.47699e-08	2.45186e-07	up
AC024560.3	1.38942	4.34657e-07	1.71548e-06	up
AC024563.1	3.02115	8.88254e-06	2.84604e-05	up
AC024581.1	2.9716	1.04731e-10	6.74929e-10	up
AC024592.3	-1.25485	5.79134e-05	0.000142193	down
AC024600.1	-1.80769	2.4984e-08	1.17048e-07	down
AC024601.1	2.23156	2.07459e-05	6.27413e-05	up
AC024901.1	1.56449	0.00452538	0.00903128	up
AC024940.1	2.25597	2.38807e-08	9.06302e-08	up
AC024941.2	2.21171	1.33011e-08	6.47489e-08	up
AC025031.1	-1.3252	2.05666e-09	1.12166e-08	down
AC025048.4	1.2396	1.30839e-08	6.37381e-08	up
AC025154.2	2.08755	0.00060968	0.00143948	up
AC025162.2	1.28164	0.000102141	0.000277012	up
AC025164.2	1.07976	1.91034e-06	6.80914e-06	up
AC025165.4	1.05585	5.19162e-07	2.02258e-06	up
AC025171.2	1.51229	1.66155e-22	4.11549e-21	up
AC025171.3	1.87838	5.97133e-08	2.66061e-07	up
AC025171.4	1.62774	2.53467e-14	2.56412e-13	up
AC025171.5	1.55081	3.65228e-12	2.85244e-11	up
AC025176.1	2.88114	6.10498e-14	5.91195e-13	up
AC025254.1	5.73381	1.58654e-12	1.29541e-11	up
AC025259.3	-1.04335	1.55945e-05	4.80363e-05	down
AC025265.1	1.20434	4.2342e-09	2.19744e-08	up
AC025265.3	2.38023	1.59357e-05	4.90117e-05	up
AC025271.4	1.18396	1.84697e-08	8.82838e-08	up
AC025287.3	1.04508	6.14315e-06	2.02426e-05	up
AC025431.1	-1.5439	0.00322257	0.00662968	down
AC025470.2	-1.67446	0.000358396	0.000879947	down
AC025524.2	1.68083	0.00667734	0.0128799	up
AC025575.2	3.04701	2.40706e-10	1.48774e-09	up
AC025580.1	2.11761	6.03252e-06	1.99044e-05	up
AC025580.3	1.48638	2.70214e-09	1.44368e-08	up
AC025594.2	2.16037	2.4061e-24	4.65204e-23	up
AC026250.1	1.45354	1.50271e-12	1.22907e-11	up
AC026254.4	1.66326	5.28562e-10	3.11436e-09	up
AC026320.1	2.53365	0.0083807	0.0158286	up
AC026333.4	1.09116	7.82685e-05	0.000215761	up
AC026355.1	2.42377	5.27466e-07	2.05172e-06	up
AC026356.1	1.05612	1.89167e-07	7.86843e-07	up
AC026356.2	1.40125	2.94776e-09	1.56317e-08	up
AC026368.1	2.06631	4.37409e-09	2.26415e-08	up
AC026369.3	-2.6344	1.27096e-18	2.13314e-17	down
AC026401.3	1.13726	2.47625e-14	2.51394e-13	up
AC026461.2	-3.0495	1.90915e-12	1.5424e-11	down
AC026461.4	-1.9128	0.00177205	0.00348722	down
AC026469.1	-1.24389	1.32467e-05	4.12116e-05	down
AC026495.1	2.10983	2.48314e-07	1.01499e-06	up
AC026523.1	2.2796	0.00137562	0.00305201	up
AC026740.1	2.51185	1.5672e-24	4.58859e-23	up
AC026904.3	-1.41545	9.79264e-06	3.11412e-05	down
AC026992.1	1.67353	0.000134913	0.000357908	up
AC026992.2	2.36121	2.36957e-08	1.11379e-07	up
AC027013.1	1.41316	0.0150172	0.0268522	up
AC027088.3	1.97852	0.0028139	0.00585905	up
AC027117.1	1.31665	7.06413e-08	3.10383e-07	up
AC027117.2	-1.07232	1.4195e-05	4.40313e-05	down
AC027228.2	1.18026	0.000190005	0.000491057	up
AC027237.2	1.31566	1.52869e-05	4.71836e-05	up
AC027243.1	1.90484	0.00893125	0.01677	up
AC027243.2	1.30099	0.0277638	0.0468978	up
AC027279.2	1.54186	4.23863e-07	1.67554e-06	up
AC027288.3	1.07784	0.000595888	0.00140892	up
AC027307.1	1.17148	4.32474e-05	0.000124096	up
AC027348.1	1.09032	0.00609107	0.0118455	up
AC027601.1	1.03677	4.55645e-15	5.05289e-14	up
AC027601.2	1.75997	3.71723e-11	2.54351e-10	up
AC027682.1	1.19733	7.93031e-06	2.56152e-05	up
AC027682.4	1.66396	1.8268e-08	8.7433e-08	up
AC027682.5	1.82349	2.50874e-05	7.49054e-05	up
AC027688.1	1.30034	1.17274e-06	4.31107e-06	up
AC027796.4	1.79804	3.84112e-16	4.82293e-15	up
AC027801.1	1.43803	4.49904e-14	4.43432e-13	up
AC032011.1	1.24646	0.000375317	0.000917989	up
AC034102.5	1.90067	5.40409e-08	2.4214e-07	up
AC034111.1	1.38747	8.26759e-05	0.000227251	up
AC034213.1	4.02928	5.68884e-14	5.53856e-13	up
AC034228.1	3.45414	0.000493795	0.00118324	up
AC034229.4	2.70423	4.30875e-17	6.04589e-16	up
AC034236.2	1.033	2.92682e-15	3.31391e-14	up
AC034236.3	1.58281	9.42593e-06	3.00335e-05	up
AC036103.1	1.07315	0.000828773	0.00191106	up
AC036108.2	2.33821	1.65041e-15	1.92554e-14	up
AC036214.1	1.75394	3.98157e-06	1.35314e-05	up
AC037198.3	-1.22323	0.000194048	0.000500597	down
AC037487.1	1.70799	6.37034e-09	3.22873e-08	up
AC037487.4	1.22241	0.000985319	0.00224247	up
AC040173.1	3.11023	4.35278e-09	2.2537e-08	up
AC040174.1	2.68465	0.000475727	0.00114421	up
AC040174.2	2.14761	0.0167157	0.0296049	up
AC040918.1	1.20025	0.00673538	0.012978	up
AC040934.1	1.43453	5.89259e-06	1.94642e-05	up
AC040970.1	1.92054	2.45019e-10	1.51205e-09	up
AC044781.1	1.61804	0.00079996	0.00184804	up
AC044860.1	1.5962	1.11389e-05	3.50867e-05	up
AC046158.1	-1.31791	3.05831e-05	9.00867e-05	down
AC048337.1	2.06315	2.59673e-07	1.05925e-06	up
AC048341.2	1.06091	3.41992e-13	3.00793e-12	up
AC048341.3	1.64224	5.5843e-21	1.19855e-19	up
AC048344.4	1.44425	8.77402e-05	0.000240045	up
AC048382.1	1.09076	3.18536e-05	9.36215e-05	up
AC048383.1	2.33872	1.06662e-05	3.37255e-05	up
AC055713.1	1.31958	9.836e-31	5.2934e-29	up
AC055822.1	1.04184	1.48648e-08	7.19739e-08	up
AC060834.2	2.80241	0.00876965	0.0165007	up
AC061975.1	1.87481	3.84066e-05	0.000111242	up
AC061975.6	4.32807	3.52946e-08	1.61816e-07	up
AC061975.7	-1.67407	0.00451709	0.00901655	down
AC062015.1	4.12829	0.000103586	0.000280511	up
AC063948.1	1.6828	3.69983e-14	3.67568e-13	up
AC063977.6	-1.14247	1.90862e-05	5.79856e-05	down
AC064807.2	1.24524	0.00022288	0.000568941	up
AC064836.2	1.34603	0.000396353	0.000964943	up
AC064853.1	1.94888	0.0085742	0.0161681	up
AC064875.1	1.20847	1.56482e-05	4.81868e-05	up
AC067930.3	1.41762	3.08584e-07	1.24401e-06	up
AC067930.5	1.45032	2.7337e-07	1.11061e-06	up
AC068025.1	1.38202	1.03054e-06	3.83141e-06	up
AC068189.1	2.18112	6.48592e-08	2.86874e-07	up
AC068196.1	1.34355	0.000382748	0.000934101	up
AC068389.2	2.15772	6.32397e-09	3.20604e-08	up
AC068506.1	2.1274	2.09007e-08	9.90822e-08	up
AC068580.1	1.36052	2.0878e-10	1.29724e-09	up
AC068580.4	1.43691	6.57189e-11	3.39353e-10	up
AC068620.3	1.23383	6.72023e-09	3.39485e-08	up
AC068675.1	2.54403	6.62905e-09	3.34963e-08	up
AC068756.1	3.25891	3.54386e-07	1.41804e-06	up
AC068790.3	1.44654	1.5195e-06	5.48864e-06	up
AC068790.5	1.25044	0.000207061	0.000531077	up
AC068790.7	1.3677	2.38618e-05	7.15243e-05	up
AC068831.3	1.25944	3.87049e-12	3.00755e-11	up
AC068831.8	1.43325	0.000686018	0.00160508	up
AC068858.1	3.33364	1.40455e-18	2.34944e-17	up
AC068870.1	1.05273	0.000746657	0.00173374	up
AC068987.1	2.28866	8.96237e-17	1.21235e-15	up
AC068987.3	2.02206	2.77468e-07	1.12585e-06	up
AC068987.4	1.84308	3.29361e-16	4.16168e-15	up
AC069061.2	3.49216	0.00625947	0.0121432	up
AC069148.1	1.18965	0.0117589	0.0215042	up
AC069208.1	-1.33237	2.90573e-08	1.34676e-07	down
AC069222.1	1.77253	4.93411e-11	3.31697e-10	up
AC069224.1	1.31574	5.14864e-14	5.04962e-13	up
AC069234.5	1.27796	2.46955e-06	8.6311e-06	up
AC069277.1	5.00865	3.26901e-16	4.13321e-15	up
AC069503.2	1.31186	3.56472e-09	1.49855e-08	up
AC069544.1	1.33172	2.30738e-20	4.64247e-19	up
AC073072.1	1.43405	0.00114028	0.00256933	up
AC073111.1	2.53904	3.50025e-14	3.48087e-13	up
AC073195.1	1.34056	8.68279e-16	1.04989e-14	up
AC073263.1	2.33374	4.48131e-11	3.03097e-10	up
AC073283.2	1.54725	0.000209458	0.000536534	up
AC073288.2	1.02143	0.0016313	0.00356376	up
AC073321.1	-1.54391	5.44579e-05	0.000153823	down
AC073324.2	1.95766	2.83713e-06	9.82963e-06	up
AC073342.1	1.12993	0.000885261	0.00203238	up
AC073352.1	2.67734	3.08826e-16	3.91461e-15	up
AC073365.1	2.77231	0.00449902	0.00898317	up
AC073370.1	1.75366	2.39172e-05	7.16797e-05	up
AC073389.3	1.13471	1.4891e-07	6.27986e-07	up
AC073476.3	1.15498	0.000604444	0.00142796	up
AC073529.1	1.36544	8.45534e-13	7.09857e-12	up
AC073585.1	2.99534	1.00391e-16	1.35067e-15	up
AC073592.1	1.03802	0.00312806	0.00645054	up
AC073611.1	1.18537	3.04233e-13	2.69485e-12	up
AC073641.1	1.38305	8.46905e-05	0.000232339	up
AC073655.1	2.09806	2.60186e-06	9.06512e-06	up
AC073655.2	1.1977	7.47015e-12	5.60163e-11	up
AC073842.2	2.28568	2.53073e-18	4.08585e-17	up
AC073896.5	1.81225	2.39993e-06	8.41243e-06	up
AC074044.1	1.50165	1.3548e-06	4.93213e-06	up
AC074135.1	3.30966	4.21014e-10	2.51185e-09	up
AC074138.1	1.93999	2.36135e-11	1.6561e-10	up
AC074212.1	1.41913	2.50805e-17	3.60808e-16	up
AC074327.1	6.1031	5.51711e-51	1.20885e-48	up
AC078778.1	2.08165	1.69526e-20	3.48473e-19	up
AC078778.2	1.38096	0.000118812	0.000318585	up
AC078820.1	1.66357	0.000201789	0.000518956	up
AC078845.1	-1.11019	0.00945472	0.0176614	down
AC078850.1	2.36531	7.95147e-09	3.97454e-08	up
AC078860.1	2.13403	2.10154e-05	6.35081e-05	up
AC078906.1	1.61717	0.00147272	0.00324541	up
AC078909.2	3.16602	5.80407e-17	8.04642e-16	up
AC078923.1	1.06888	0.00153786	0.0033774	up
AC078942.1	-1.87352	2.42648e-07	9.94481e-07	down
AC078962.1	-1.08106	0.0124789	0.0227002	down
AC078993.1	4.21991	6.88779e-23	1.75173e-21	up
AC079061.1	-2.21284	1.6492e-11	1.17735e-10	down
AC079062.1	4.90987	9.49407e-17	1.27993e-15	up
AC079089.1	1.96599	1.02277e-05	3.24163e-05	up
AC079145.1	1.10832	2.08875e-05	6.31312e-05	up
AC079160.1	2.63646	0.00141533	0.0031314	up
AC079174.1	1.03122	0.0102501	0.0190065	up
AC079174.2	1.74196	2.78792e-23	7.29505e-22	up
AC079209.1	1.3713	9.42625e-06	3.00335e-05	up
AC079315.1	1.37943	2.50405e-11	1.74942e-10	up
AC079336.2	1.23988	0.00075913	0.00176044	up
AC079340.2	-1.04775	0.00232523	0.00491815	down
AC079360.1	1.14987	0.00119979	0.00269428	up
AC079380.1	2.31365	6.37033e-07	2.44783e-06	up
AC079385.3	1.18278	0.000215925	0.000552036	up
AC079466.1	6.21826	4.57212e-32	2.77938e-30	up
AC079584.2	-1.13051	0.00119755	0.00268956	down
AC079598.2	3.08507	2.23978e-06	7.89446e-06	up
AC079760.2	3.23499	5.24295e-11	3.51629e-10	up
AC079766.1	-1.12412	3.4416e-10	2.07757e-09	down
AC079789.1	-2.69366	1.38706e-11	1.00132e-10	down
AC079906.1	1.40275	0.0003194	0.000791514	up
AC079907.1	1.5663	8.42557e-10	4.83307e-09	up
AC080013.3	1.61253	1.51271e-09	8.42044e-09	up
AC080013.5	1.01383	6.18379e-05	0.000173148	up
AC080037.1	2.23749	0.0001375	0.000364287	up
AC080038.2	1.81135	1.65255e-05	5.06939e-05	up
AC080129.2	2.06072	1.91349e-17	2.78896e-16	up
AC083805.1	1.36178	0.00558947	0.0109564	up
AC083809.1	3.02836	4.71973e-09	2.43044e-08	up
AC083880.1	1.03877	8.36521e-09	4.17491e-08	up
AC083902.2	2.13466	1.45107e-06	4.3939e-06	up
AC084018.1	1.51921	1.9083e-16	2.46291e-15	up
AC084033.3	1.64136	1.28224e-26	4.69974e-25	up
AC084064.1	-1.34562	0.00163256	0.00356574	down
AC084125.4	1.26721	7.2595e-10	4.19922e-09	up
AC084346.2	1.34309	0.00315782	0.00650856	up
AC084757.2	1.5755	2.72981e-05	8.11415e-05	up
AC084757.3	1.8941	2.46477e-07	1.00852e-06	up
AC084757.4	1.41547	0.000148805	0.000391479	up
AC084782.2	2.06844	0.000100831	0.000273693	up
AC084855.2	1.19505	0.00145072	0.0032026	up
AC084864.1	2.47082	5.81839e-07	2.24875e-06	up
AC087222.1	1.34149	4.37831e-06	1.47639e-05	up
AC087239.1	1.1693	5.5701e-07	2.15822e-06	up
AC087257.1	-1.133	0.00736776	0.0140795	down
AC087273.1	-1.03137	1.23391e-05	3.85384e-05	down
AC087273.2	1.74171	4.83563e-06	1.62156e-05	up
AC087289.1	1.30321	2.97816e-05	8.79336e-05	up
AC087289.2	1.06248	1.28938e-10	8.19539e-10	up
AC087289.3	1.64955	4.2496e-07	1.37555e-06	up
AC087294.1	1.72098	8.15458e-13	6.86341e-12	up
AC087380.1	2.05413	5.1566e-05	0.000146255	up
AC087388.1	1.27076	1.6555e-15	1.93035e-14	up
AC087392.1	-2.47698	1.63381e-11	1.1672e-10	down
AC087477.4	-2.61601	4.03652e-06	1.37046e-05	down
AC087491.1	1.42927	0.00345207	0.00706827	up
AC087499.3	1.8402	0.0025786	0.00540866	up
AC087521.1	-1.45626	4.27513e-09	2.2158e-08	down
AC087525.1	2.41444	1.72241e-06	6.17904e-06	up
AC087564.1	-1.53182	8.95122e-05	0.000244625	down
AC087627.1	2.26767	4.09725e-09	2.13025e-08	up
AC087633.2	-1.43713	0.00537692	0.010572	down
AC087741.1	1.29209	4.30367e-19	7.58718e-18	up
AC087741.2	1.23156	8.95394e-09	4.44553e-08	up
AC087742.2	1.83496	6.27819e-09	3.18445e-08	up
AC087752.4	1.04251	9.60757e-08	4.14913e-07	up
AC089983.1	2.91347	8.50968e-09	4.23339e-08	up
AC090049.1	1.71024	0.0214419	0.0371207	up
AC090116.1	2.38312	4.34843e-05	0.000124735	up
AC090164.2	2.63346	2.1792e-16	2.79428e-15	up
AC090192.2	4.56451	2.44784e-17	3.53166e-16	up
AC090227.2	-2.61286	5.12849e-10	3.0314e-09	down
AC090241.3	1.43811	8.94472e-07	3.35116e-06	up
AC090260.1	1.11999	0.000258154	0.00065049	up
AC090337.1	1.54393	7.35121e-05	0.000203634	up
AC090358.1	3.18348	0.00163593	0.00357271	up
AC090360.1	1.01263	2.44969e-06	7.21759e-06	up
AC090409.1	1.48058	7.01053e-10	4.06228e-09	up
AC090502.1	7.90558	2.13904e-34	1.59739e-32	up
AC090503.1	1.56945	0.0157502	0.0280271	up
AC090503.2	1.40018	0.0219779	0.037954	up
AC090510.2	1.33363	4.04436e-09	2.10385e-08	up
AC090559.1	-1.29014	9.58087e-11	6.19835e-10	down
AC090568.2	2.87673	0.000116833	0.000313616	up
AC090607.1	1.0447	0.00427181	0.00857156	up
AC090673.1	1.77453	0.000464062	0.00111791	up
AC090709.1	2.42208	9.05764e-06	2.89795e-05	up
AC090772.3	1.65299	4.90322e-11	3.29732e-10	up
AC090774.4	2.11658	0.00914854	0.017136	up
AC090809.1	5.67353	1.0269e-16	1.37788e-15	up
AC090825.1	1.08406	0.000520413	0.00124225	up
AC090826.2	1.87417	1.42022e-09	7.93661e-09	up
AC090907.2	1.46182	0.00109929	0.00248232	up
AC090912.3	1.54213	2.93226e-05	8.6694e-05	up
AC090921.1	1.65184	4.00834e-05	0.000115746	up
AC091057.3	2.35662	2.68678e-16	3.41221e-15	up
AC091133.2	3.05361	0.000336911	0.000831597	up
AC091133.3	3.61063	1.48296e-11	1.06631e-10	up
AC091153.3	1.13147	1.09819e-06	4.05948e-06	up
AC091173.1	1.85349	0.0159661	0.0283581	up
AC091182.1	1.97708	2.11816e-15	2.43564e-14	up
AC091544.5	1.08029	0.00169516	0.00368831	up
AC091544.8	-1.34586	0.00101337	0.00230237	down
AC091588.3	-1.30687	2.87289e-10	1.75606e-09	down
AC091729.2	-2.64519	7.9943e-08	3.49405e-07	down
AC091987.1	4.7886	5.76291e-19	1.0018e-17	up
AC092042.3	-1.22662	5.17289e-05	0.000127946	down
AC092112.1	1.46154	0.000844615	0.00194466	up
AC092115.3	3.74606	5.46792e-14	5.3339e-13	up
AC092117.1	1.47735	1.59148e-14	1.65188e-13	up
AC092119.2	2.40689	2.91315e-37	2.7792e-35	up
AC092123.2	1.20565	2.57122e-16	3.27171e-15	up
AC092155.1	-2.88135	1.46313e-12	1.19857e-11	down
AC092159.2	1.51031	1.49109e-05	4.61016e-05	up
AC092167.1	2.03925	1.241e-05	3.87477e-05	up
AC092171.1	1.31832	3.60026e-05	0.000104766	up
AC092171.2	2.59149	3.3839e-64	1.37697e-61	up
AC092171.3	1.18271	2.23379e-14	2.28173e-13	up
AC092171.4	2.54581	9.9423e-31	5.32902e-29	up
AC092171.5	1.24087	2.33711e-13	2.10097e-12	up
AC092198.1	1.67906	0.00016919	0.00044069	up
AC092296.3	-1.11241	4.85499e-06	1.6275e-05	down
AC092301.1	1.00867	3.56334e-05	0.000103782	up
AC092343.1	2.5443	0.00103212	0.00234096	up
AC092378.1	-1.35166	2.12752e-07	8.77549e-07	down
AC092384.2	-2.31086	2.7633e-10	1.69426e-09	down
AC092447.5	3.06606	3.31994e-06	1.14132e-05	up
AC092490.1	3.10032	5.80981e-12	4.4299e-11	up
AC092506.1	2.66855	1.86268e-10	1.1628e-09	up
AC092535.4	1.87971	1.16349e-21	2.66347e-20	up
AC092598.1	3.42704	2.18636e-07	9.00514e-07	up
AC092620.1	1.05858	0.0016082	0.00351753	up
AC092625.1	3.77437	4.66824e-07	1.8294e-06	up
AC092634.3	1.16263	0.000444833	0.00107509	up
AC092650.1	1.01802	0.00105029	0.00237975	up
AC092667.1	2.29857	9.14325e-15	9.77519e-14	up
AC092681.3	1.1097	0.00263369	0.00551378	up
AC092683.1	1.84952	6.23926e-11	4.15375e-10	up
AC092691.1	1.72904	0.0215678	0.0373235	up
AC092745.2	-1.27297	2.63074e-05	7.83601e-05	down
AC092747.1	-1.58892	2.1383e-05	6.45408e-05	down
AC092756.1	-1.01709	0.000613143	0.00144693	down
AC092757.2	1.64229	3.07357e-08	1.42124e-07	up
AC092757.3	2.18838	1.7247e-11	1.22642e-10	up
AC092794.2	1.40363	7.52766e-05	0.000208117	up
AC092801.1	1.6167	0.0244315	0.041743	up
AC092803.2	1.0565	3.32058e-14	3.3055e-13	up
AC092809.2	-1.70774	8.11422e-12	6.03017e-11	down
AC092809.4	1.35232	4.13176e-10	2.46804e-09	up
AC092821.1	2.49175	5.97967e-27	1.47264e-25	up
AC092834.1	1.1755	0.0037259	0.00757372	up
AC092910.3	1.24078	6.11985e-16	7.52303e-15	up
AC092954.1	2.59926	6.83333e-06	2.2358e-05	up
AC092957.1	4.92922	1.08995e-13	1.01697e-12	up
AC092978.1	1.24909	0.0132413	0.0239363	up
AC093001.1	-2.58598	0.000212687	0.000544387	down
AC093151.2	1.90691	0.000132871	0.000352865	up
AC093151.3	1.07496	0.000414948	0.00100751	up
AC093155.3	-1.41279	1.36452e-07	4.71612e-07	down
AC093206.1	1.23502	0.00502141	0.00993667	up
AC093249.2	1.69645	3.24748e-08	1.49611e-07	up
AC093297.2	1.10354	4.99027e-09	2.56314e-08	up
AC093458.1	1.75102	7.17983e-06	2.3379e-05	up
AC093484.5	1.00462	1.60609e-05	4.93509e-05	up
AC093515.1	3.78818	2.52714e-09	1.35672e-08	up
AC093609.1	-1.54528	2.66201e-11	1.85652e-10	down
AC093627.6	-1.63539	7.95748e-05	0.00021918	down
AC093627.7	1.50519	1.70255e-06	6.11441e-06	up
AC093702.1	2.27116	0.00218962	0.00465248	up
AC093719.1	1.14527	0.00317742	0.00654624	up
AC093725.2	-3.91724	5.9314e-12	4.5157e-11	down
AC093730.1	2.16	0.00289858	0.00601341	up
AC093734.1	1.36269	0.00073413	0.00170863	up
AC093788.1	1.20087	1.66994e-11	1.19131e-10	up
AC093821.1	2.12176	0.00157339	0.00344934	up
AC093833.1	1.70529	0.00049672	0.0011894	up
AC093895.1	5.37466	2.54688e-24	7.23393e-23	up
AC095057.3	1.01835	7.16881e-08	3.14844e-07	up
AC096564.1	-1.31225	8.27718e-09	4.1332e-08	down
AC096577.1	-3.32807	4.8005e-05	0.000136778	down
AC096637.2	2.47961	1.1076e-10	7.09885e-10	up
AC096642.1	1.71899	4.81346e-18	7.53341e-17	up
AC096708.4	1.35242	0.000648864	0.0015237	up
AC096711.1	2.34594	2.47147e-05	7.39252e-05	up
AC096711.3	2.17654	4.14064e-06	1.40409e-05	up
AC096734.1	1.88225	0.0019376	0.00416133	up
AC096759.2	1.64338	0.0190753	0.0334368	up
AC097059.1	1.51312	0.00039438	0.000960609	up
AC097065.2	1.41803	0.000425929	0.00103254	up
AC097358.2	1.73521	0.00197299	0.00422913	up
AC097374.1	2.11708	0.00133912	0.00297633	up
AC097375.1	-1.58342	0.00630154	0.0122177	down
AC097460.1	1.27051	0.000776481	0.00179713	up
AC097461.1	1.1576	2.18746e-11	1.53956e-10	up
AC097478.1	3.44723	1.2101e-11	8.78668e-11	up
AC097478.2	1.85384	0.0081308	0.0154048	up
AC097478.3	1.93726	0.0139831	0.0251588	up
AC097512.1	3.51124	4.58654e-07	1.79916e-06	up
AC097515.1	3.53121	8.97048e-15	9.59562e-14	up
AC097634.1	1.73255	4.71123e-10	2.79992e-09	up
AC097641.1	1.30174	0.00976537	0.018177	up
AC097641.3	1.80036	2.91336e-17	4.14628e-16	up
AC097652.1	1.40417	0.00968534	0.0180465	up
AC097717.1	1.50747	1.28726e-05	4.01041e-05	up
AC097724.1	1.01794	0.0105462	0.0194831	up
AC098617.1	1.55395	0.0015033	0.00330841	up
AC098820.1	1.46996	3.77948e-16	4.75152e-15	up
AC098820.2	-1.45659	4.61364e-05	0.00013185	down
AC098820.3	1.14307	1.08189e-06	4.00741e-06	up
AC098934.1	1.81793	1.49812e-19	2.76583e-18	up
AC098934.2	1.91264	2.35752e-16	3.00981e-15	up
AC099066.2	1.60213	4.81941e-07	1.88642e-06	up
AC099343.2	1.43601	1.78854e-12	1.45084e-11	up
AC099344.2	1.60465	0.0217043	0.0375337	up
AC099489.1	1.34697	1.30237e-10	6.50381e-10	up
AC099508.2	-2.4449	1.43537e-13	1.32254e-12	down
AC099518.1	1.43127	3.76716e-06	1.28377e-05	up
AC099518.2	2.21754	5.91807e-10	3.46652e-09	up
AC099520.1	4.31459	2.49803e-17	3.59626e-16	up
AC099552.1	3.18617	6.69113e-05	0.00018662	up
AC099568.2	1.43822	2.29541e-13	2.06629e-12	up
AC099676.1	1.48615	3.7709e-22	9.01928e-21	up
AC099684.1	-1.08413	2.33212e-05	7.00513e-05	down
AC099778.1	1.2748	1.11107e-17	1.66695e-16	up
AC099791.2	2.13593	7.32411e-08	3.21239e-07	up
AC099792.1	3.20853	1.45397e-10	9.17377e-10	up
AC099850.3	2.6274	7.96118e-27	2.94504e-25	up
AC100791.2	2.1953	2.79394e-05	8.28747e-05	up
AC100803.1	2.49689	9.94208e-06	3.15812e-05	up
AC100803.3	2.02741	3.83381e-15	4.28729e-14	up
AC100810.1	-1.10161	3.19831e-19	5.72452e-18	down
AC100812.1	1.64491	1.10659e-06	4.08598e-06	up
AC100826.1	1.7251	3.53178e-05	0.000102931	up
AC100827.4	1.39824	0.000141511	0.000374054	up
AC100849.1	-1.83848	1.12936e-17	1.69184e-16	down
AC100872.1	3.05002	7.47357e-13	6.333e-12	up
AC102953.1	1.30267	1.20705e-07	5.14259e-07	up
AC102953.2	2.04481	1.1536e-35	9.35023e-34	up
AC103706.1	1.83319	2.12398e-20	4.29513e-19	up
AC103740.1	-1.38651	2.68883e-08	1.25292e-07	down
AC103770.1	2.10899	0.000752002	0.00174473	up
AC103808.3	3.16741	1.08123e-07	4.63726e-07	up
AC103808.6	2.46285	0.000618158	0.00145777	up
AC103810.1	1.37867	5.18904e-06	1.73249e-05	up
AC103810.5	1.01678	0.00641755	0.0124233	up
AC103858.1	-1.00391	1.37624e-05	4.27493e-05	down
AC104009.1	1.67339	0.00325719	0.00669331	up
AC104024.1	-2.04492	4.95341e-14	4.86772e-13	down
AC104041.1	3.10803	2.10819e-07	8.70116e-07	up
AC104072.1	3.9076	0.000350924	0.00086277	up
AC104088.1	3.5199	3.49004e-09	1.83416e-08	up
AC104118.1	1.1658	1.77067e-12	1.43693e-11	up
AC104134.1	2.71707	5.23781e-07	2.03858e-06	up
AC104135.1	1.26079	0.00574365	0.011229	up
AC104170.1	-1.11684	1.71431e-09	9.47418e-09	down
AC104248.1	1.514	0.00388576	0.00786341	up
AC104316.2	1.51333	0.00125724	0.00281189	up
AC104365.2	1.1689	0.00446726	0.00892423	up
AC104462.1	1.23403	0.00923819	0.0172909	up
AC104534.1	1.33973	2.28092e-08	1.07516e-07	up
AC104574.2	1.81612	0.00014604	0.000384915	up
AC104581.1	1.01003	3.86927e-10	1.83554e-09	up
AC104590.1	2.41336	1.28336e-13	1.18963e-12	up
AC104662.1	1.07063	0.00801623	0.0152108	up
AC104667.1	1.78188	6.58342e-09	3.32996e-08	up
AC104777.1	-1.34467	7.03557e-05	0.000195652	down
AC104794.4	-1.49558	1.50506e-11	1.08103e-10	down
AC104809.1	-2.35599	1.42141e-06	5.15956e-06	down
AC104958.1	1.11596	0.00113203	0.00255219	up
AC104958.2	1.12337	1.20794e-09	6.80561e-09	up
AC104971.4	1.68839	0.000701738	0.00163859	up
AC104986.2	1.03323	5.16457e-09	2.64857e-08	up
AC105053.1	-1.63861	1.55034e-06	5.59193e-06	down
AC105105.3	-1.14941	2.32158e-09	1.25311e-08	down
AC105105.4	1.59618	0.000511233	0.00122151	up
AC105118.1	5.72671	1.95273e-24	5.62653e-23	up
AC105137.3	2.11896	1.23042e-20	2.57162e-19	up
AC105202.1	-1.79949	2.93467e-09	1.55665e-08	down
AC105219.1	1.41289	6.90463e-14	6.64117e-13	up
AC105219.2	1.72552	0.000457102	0.00110247	up
AC105219.4	2.07267	8.73158e-07	3.27315e-06	up
AC105339.2	1.39287	3.50527e-06	1.20027e-05	up
AC105384.1	-2.21011	7.02534e-16	8.56747e-15	down
AC105411.1	2.9516	1.38608e-16	1.82543e-15	up
AC105446.1	1.24231	0.000311043	0.000771668	up
AC105460.2	-1.38473	0.000364867	0.000894733	down
AC106038.1	1.95793	1.39203e-08	6.76145e-08	up
AC106052.1	1.03074	0.00107003	0.00242007	up
AC106729.1	1.53949	0.0256877	0.0437168	up
AC106744.1	2.40405	0.011269	0.0206778	up
AC106754.1	2.31248	0.00228745	0.00484589	up
AC106771.1	4.50474	7.51908e-12	5.63196e-11	up
AC106772.1	1.56144	0.000106442	0.000287697	up
AC106782.1	1.61219	4.33749e-05	0.000108406	up
AC106786.1	1.69382	1.60334e-05	4.92741e-05	up
AC106795.2	-1.22381	0.000156727	0.000410371	down
AC106798.1	1.53129	0.00117525	0.00264513	up
AC106799.3	1.65023	0.0222794	0.0384414	up
AC106820.2	2.14207	2.36291e-10	1.46226e-09	up
AC106820.3	1.67127	1.09695e-15	1.31443e-14	up
AC106820.5	2.07033	7.86717e-14	7.48752e-13	up
AC106822.1	-1.88237	6.27492e-10	3.65835e-09	down
AC106869.1	1.08827	5.78634e-05	0.000162728	up
AC106881.1	-1.05735	7.54994e-06	2.44977e-05	down
AC106892.1	2.79863	0.0232171	0.0398868	up
AC106897.1	1.09584	2.45051e-06	8.57056e-06	up
AC106900.2	4.36834	8.47065e-17	1.15052e-15	up
AC107067.1	-1.52111	2.07514e-05	6.27483e-05	down
AC107208.1	-1.38429	0.00170127	0.00369996	down
AC107294.1	-1.24435	1.92957e-05	5.85685e-05	down
AC107375.1	1.48603	1.86333e-29	9.0177e-28	up
AC107396.1	-4.3304	1.25392e-10	7.98782e-10	down
AC107398.3	2.34003	1.49927e-06	5.42144e-06	up
AC107419.1	4.49392	4.38561e-19	7.71118e-18	up
AC107871.2	1.48893	0.000186799	0.000483398	up
AC107926.1	1.35351	0.0157727	0.0280621	up
AC107953.2	-1.24795	0.000863154	0.00198483	down
AC107959.2	1.06114	0.00175256	0.00380036	up
AC107959.3	2.17545	1.66892e-14	1.72239e-13	up
AC107973.1	3.28147	0.000849996	0.0019566	up
AC108002.1	1.60367	1.76895e-12	1.43612e-11	up
AC108058.1	-1.12893	2.74235e-05	8.14899e-05	down
AC108062.1	1.15013	3.74716e-13	3.28416e-12	up
AC108134.2	1.39018	6.18134e-12	4.69344e-11	up
AC108136.1	2.90457	3.15001e-13	2.78405e-12	up
AC108463.2	1.67132	1.7132e-11	1.21921e-10	up
AC108463.3	1.81967	2.61346e-07	1.06564e-06	up
AC108474.1	1.52276	0.024962	0.0425653	up
AC108517.1	2.83881	0.00412691	0.00830673	up
AC108676.1	1.01838	4.1744e-05	0.000120158	up
AC108681.1	1.48766	0.00297345	0.00615464	up
AC108748.1	-1.68383	4.24806e-11	2.88396e-10	down
AC108751.4	1.79232	1.45241e-14	1.51939e-13	up
AC108752.1	4.20195	4.5661e-07	1.79219e-06	up
AC108860.2	1.29973	0.0178603	0.0314813	up
AC108865.1	2.39323	7.60231e-05	0.000209977	up
AC108865.2	1.8891	0.00500171	0.00990161	up
AC108868.1	2.26119	0.0086676	0.0163334	up
AC108868.2	2.34489	0.0178503	0.0314665	up
AC109322.1	2.08474	6.46073e-30	3.22051e-28	up
AC109361.1	1.09337	0.000278585	0.000698004	up
AC109361.2	1.63993	0.000942956	0.00215426	up
AC109439.2	3.09053	1.4468e-05	4.48502e-05	up
AC109460.1	1.2647	8.27546e-14	7.85736e-13	up
AC109460.2	1.11741	2.99191e-08	1.38541e-07	up
AC109479.1	1.11815	0.000705297	0.00164642	up
AC109588.1	5.50473	7.86465e-12	5.86656e-11	up
AC109635.4	5.07932	1.94384e-07	8.07128e-07	up
AC109779.1	1.80668	0.000700605	0.00163633	up
AC109830.1	4.29389	2.20759e-12	1.7706e-11	up
AC110048.2	1.41198	1.49981e-05	4.63424e-05	up
AC110285.1	1.9172	2.8917e-10	1.76701e-09	up
AC110285.2	2.09589	3.18529e-23	8.31304e-22	up
AC110285.5	1.84906	4.99895e-07	1.95286e-06	up
AC110285.6	3.73218	1.34417e-27	5.36027e-26	up
AC110799.1	2.2923	7.04746e-08	3.09924e-07	up
AC110995.1	-1.65938	2.84436e-18	4.55899e-17	down
AC111000.4	2.45008	4.1286e-26	1.40239e-24	up
AC111149.2	1.92692	1.60624e-07	6.74249e-07	up
AC111152.2	1.10801	0.00175133	0.00379811	up
AC111182.1	1.70666	9.61911e-09	4.75919e-08	up
AC111188.1	1.23085	0.0207721	0.036144	up
AC112178.1	5.48058	1.10792e-16	1.47864e-15	up
AC112206.2	-1.59499	1.9332e-06	6.88567e-06	down
AC112219.1	1.01743	0.0230599	0.0396304	up
AC112219.2	1.50059	1.69071e-07	7.0777e-07	up
AC112236.1	1.97245	6.98099e-05	0.000194188	up
AC112484.1	1.11554	1.60865e-07	5.51282e-07	up
AC112484.2	1.59843	1.05303e-14	1.11623e-13	up
AC112484.4	2.19242	5.64541e-22	1.3274e-20	up
AC112493.1	3.9061	1.54459e-14	1.60991e-13	up
AC112495.1	-1.69908	0.00594562	0.0115873	down
AC112694.1	1.19305	4.43198e-05	0.000127004	up
AC112907.3	1.22677	4.06362e-13	3.54748e-12	up
AC113133.1	-1.35285	0.0111356	0.0204651	down
AC113145.1	3.94028	5.56602e-05	0.000157019	up
AC113146.2	1.09829	0.000434345	0.00105191	up
AC113361.1	1.26368	0.000273138	0.000685303	up
AC113382.1	1.34383	0.000349208	0.000858977	up
AC113383.1	2.93361	3.4962e-12	2.73805e-11	up
AC113404.1	3.04069	1.92539e-15	2.22812e-14	up
AC113554.2	2.66729	3.99177e-05	0.000100199	up
AC114284.1	1.38393	9.28043e-05	0.000253171	up
AC114316.2	4.3425	4.41672e-24	1.21974e-22	up
AC114401.1	4.24558	2.30737e-17	3.33866e-16	up
AC114485.1	4.67087	1.32492e-07	5.62197e-07	up
AC114488.1	1.69754	1.44798e-06	5.24931e-06	up
AC114488.2	1.00996	0.000323248	0.000800552	up
AC114489.1	3.40165	5.24426e-07	2.0403e-06	up
AC114498.1	1.15583	0.0242969	0.0415378	up
AC114730.2	1.3995	7.15124e-05	0.000198564	up
AC114803.1	1.95233	0.00903315	0.0169485	up
AC114811.2	2.72439	7.34692e-10	4.24487e-09	up
AC114812.2	1.88774	9.13071e-06	2.91899e-05	up
AC114912.1	1.92075	0.00690485	0.01327	up
AC114947.1	1.23899	0.00184493	0.00398161	up
AC115099.1	1.22184	0.0117495	0.021489	up
AC115220.1	3.3875	0.000806341	0.00166997	up
AC115619.1	-1.06139	7.29654e-08	3.20171e-07	down
AC116025.1	-1.17269	0.00010966	0.000295675	down
AC116025.2	3.29634	1.94662e-20	3.96463e-19	up
AC116049.2	5.0669	1.09409e-29	5.37317e-28	up
AC116337.3	1.60732	6.25248e-08	2.77596e-07	up
AC116552.1	1.07933	5.80976e-05	0.000163271	up
AC116563.1	1.19445	0.0072824	0.0139324	up
AC116914.1	1.07004	0.0145701	0.0261229	up
AC116914.2	1.13308	8.89806e-09	4.41889e-08	up
AC117382.2	1.41762	0.000235147	0.000597654	up
AC117386.2	5.16218	5.34079e-24	1.46681e-22	up
AC117402.1	1.4123	1.82928e-06	6.54242e-06	up
AC118754.1	-1.12705	8.87e-06	2.84248e-05	down
AC118758.3	1.1468	0.00105462	0.00238874	up
AC119150.1	1.96062	9.12198e-08	3.95312e-07	up
AC119424.1	-1.72281	6.12012e-10	3.57752e-09	down
AC119428.2	-1.00988	0.00231982	0.00490872	down
AC120042.2	1.18173	0.00173574	0.00376675	up
AC120114.2	1.07281	3.36594e-24	9.49272e-23	up
AC120349.1	1.01597	0.0232478	0.0399327	up
AC120498.10	1.68336	0.000121487	0.000325056	up
AC120498.4	1.3005	2.10539e-11	1.48495e-10	up
AC120498.9	1.88783	9.65505e-10	5.49877e-09	up
AC121247.1	1.29677	0.000103686	0.000280743	up
AC121338.2	1.62603	4.03987e-11	2.75012e-10	up
AC122685.1	2.50845	0.000731083	0.00170193	up
AC122694.1	2.46574	6.46275e-05	0.000180578	up
AC122710.1	4.91191	4.17931e-12	3.23742e-11	up
AC124016.1	1.40761	1.02901e-15	1.23674e-14	up
AC124067.2	2.24755	2.83783e-10	1.73675e-09	up
AC124067.3	1.65551	0.0152031	0.0271432	up
AC124067.4	3.05686	3.16666e-14	3.16491e-13	up
AC124242.1	-1.21032	3.68774e-11	2.52593e-10	down
AC124283.2	1.03219	3.1336e-06	1.0808e-05	up
AC124287.1	1.31956	0.000401743	0.00097723	up
AC124312.3	1.28892	0.000207023	0.000531047	up
AC124312.4	1.36004	0.00516036	0.0101803	up
AC124798.1	1.06166	7.43915e-05	0.000205784	up
AC124861.1	1.28624	0.00671869	0.0129521	up
AC124944.3	2.13314	8.9048e-32	5.28431e-30	up
AC124947.2	1.33339	3.16657e-11	2.18472e-10	up
AC125421.1	2.26879	0.000102403	0.000277608	up
AC125494.3	1.25353	0.00432308	0.00865788	up
AC125603.1	3.20064	3.43293e-08	1.57681e-07	up
AC125603.2	2.69835	2.38083e-11	1.66742e-10	up
AC125611.4	1.60285	4.96431e-05	0.000141183	up
AC126118.1	2.09509	3.57993e-16	4.50917e-15	up
AC126175.1	3.37961	5.87463e-06	1.94092e-05	up
AC126283.1	1.45403	1.27896e-05	3.98644e-05	up
AC126323.1	3.29167	1.27352e-14	1.3407e-13	up
AC126323.3	2.05263	0.00121987	0.0027357	up
AC126323.6	1.94254	0.00015121	0.00039744	up
AC126407.1	1.90624	0.000166518	0.000434239	up
AC126696.3	2.03597	4.1472e-07	1.64232e-06	up
AC126773.2	1.65872	0.00018678	0.000483398	up
AC127024.4	1.24906	4.55277e-08	2.05519e-07	up
AC127024.5	1.49339	1.28516e-17	1.9123e-16	up
AC127024.6	1.37141	8.43821e-08	3.67678e-07	up
AC127070.2	1.33398	5.00923e-08	2.24902e-07	up
AC127496.1	1.46604	1.77672e-09	9.80243e-09	up
AC127496.2	1.02274	0.0194334	0.0340105	up
AC128689.1	2.513	0.000391713	0.000954814	up
AC128707.1	1.16504	0.00610009	0.0118605	up
AC129492.1	1.41061	0.000710379	0.00165722	up
AC129492.2	2.25461	0.00144305	0.00318744	up
AC129507.1	-1.80474	1.07907e-19	2.02786e-18	down
AC129507.2	-1.24319	1.94781e-09	1.06755e-08	down
AC130343.2	-1.04349	1.54553e-06	5.5756e-06	down
AC130456.3	1.82357	0.000295722	0.000736865	up
AC130469.1	1.33336	3.6698e-05	0.000106649	up
AC131009.1	1.30375	4.1491e-10	2.47691e-09	up
AC131009.2	1.23399	6.13594e-05	0.000171856	up
AC131097.1	1.68703	0.000140231	0.00037083	up
AC131097.2	1.48039	0.000535647	0.00114037	up
AC131238.1	1.17014	0.00384888	0.00779907	up
AC131254.1	1.14977	0.0218224	0.0377247	up
AC131391.1	3.86276	2.86663e-11	1.99156e-10	up
AC131532.1	3.03017	1.44252e-06	5.23143e-06	up
AC131934.1	1.34578	6.9658e-05	0.000193792	up
AC131956.2	1.18426	0.006278	0.012175	up
AC132192.2	2.38853	1.787e-47	3.15318e-45	up
AC132807.2	2.75427	6.51597e-06	2.13898e-05	up
AC132825.4	1.7109	0.00277567	0.00578489	up
AC132872.1	1.19933	6.02003e-18	9.33386e-17	up
AC132872.2	2.57284	7.83504e-20	1.48926e-18	up
AC132938.1	1.13122	6.0582e-05	0.000169751	up
AC132938.5	1.24502	4.36926e-07	1.72308e-06	up
AC133644.2	2.49891	9.19146e-12	6.76268e-11	up
AC133919.1	1.33873	0.00173882	0.0037726	up
AC133919.2	1.72053	2.0959e-09	1.14118e-08	up
AC134312.6	-1.41577	7.3965e-05	0.000204746	down
AC134407.1	1.45545	2.1769e-05	6.56064e-05	up
AC134669.2	-1.19181	0.00412744	0.00764613	down
AC134682.1	1.59116	2.1573e-08	1.02099e-07	up
AC135050.2	-1.45676	7.32082e-12	4.23744e-11	down
AC135279.3	-1.06419	0.000108693	0.000293225	down
AC135586.2	-1.12314	3.7302e-10	1.77086e-09	down
AC136188.1	2.12822	0.00583544	0.011396	up
AC136475.3	1.23788	7.05492e-05	0.000196108	up
AC136624.2	1.1516	0.00127129	0.00283918	up
AC137630.3	1.53241	7.04679e-10	4.0821e-09	up
AC137894.1	1.14956	0.00787974	0.0149818	up
AC137932.2	1.01559	1.21278e-05	3.7944e-05	up
AC138150.1	1.08693	9.35884e-06	2.98562e-05	up
AC138150.2	1.2761	2.3372e-09	1.26052e-08	up
AC138356.1	-2.33332	9.27217e-24	2.50852e-22	down
AC138393.1	1.0321	3.13015e-15	3.5261e-14	up
AC138393.3	1.35943	3.63839e-06	1.2435e-05	up
AC138466.1	2.02974	0.000796794	0.00184094	up
AC138646.1	1.92652	0.00543098	0.0106699	up
AC138649.1	1.15153	0.000784954	0.00181568	up
AC138696.1	1.42484	6.82369e-07	2.15876e-06	up
AC138696.2	1.56157	1.87683e-16	2.42528e-15	up
AC138761.4	3.05303	5.73605e-05	0.000161427	up
AC138819.1	1.30465	0.00509375	0.0100648	up
AC138894.1	1.21749	0.000310041	0.000684981	up
AC138904.1	1.92478	3.0298e-07	1.2229e-06	up
AC138965.2	2.14045	0.00154221	0.00338583	up
AC139100.1	1.98739	2.22603e-19	4.04972e-18	up
AC139100.2	2.06576	7.35982e-25	2.24042e-23	up
AC139491.2	2.0821	3.41743e-13	3.00706e-12	up
AC139713.2	-1.20153	0.00166158	0.00362278	down
AC139769.1	1.69489	1.87132e-07	7.788e-07	up
AC139769.2	3.61644	1.43226e-10	9.0459e-10	up
AC139887.1	1.29515	2.06132e-10	1.28199e-09	up
AC139887.4	1.40259	2.54219e-08	1.18904e-07	up
AC141002.1	2.29217	6.83591e-14	6.5846e-13	up
AC141928.1	2.59552	7.8683e-13	6.63928e-12	up
AC144833.1	3.25363	3.42877e-05	0.000100156	up
AC145146.2	1.59255	0.00214113	0.00456306	up
AC145207.5	1.06123	1.01724e-13	9.51349e-13	up
AC145207.7	1.91692	0.000262155	0.000659239	up
AC145207.8	2.38759	3.1904e-13	2.81475e-12	up
AC145285.7	1.25953	5.26822e-16	6.52036e-15	up
AC145343.1	1.73934	4.27683e-17	6.00956e-16	up
AC145423.2	1.69496	2.35809e-09	1.2705e-08	up
AC145423.3	1.8385	2.8364e-12	2.25319e-11	up
AC148476.1	1.45646	0.000288966	0.000721926	up
AC211433.1	1.23241	0.000114298	0.000307225	up
AC211433.2	1.10477	0.00190302	0.0040959	up
AC211476.2	1.93568	1.65296e-10	1.0374e-09	up
AC226118.1	2.30049	4.009e-06	1.36176e-05	up
AC232271.1	1.33299	9.0001e-22	2.077e-20	up
AC233266.2	1.35894	0.00430848	0.00863384	up
AC233280.1	2.43353	2.5798e-16	3.28053e-15	up
AC233992.2	1.8399	9.34093e-10	4.20749e-09	up
AC233992.3	1.13551	3.48115e-07	1.39463e-06	up
AC234582.1	1.19642	1.18851e-11	8.63303e-11	up
AC234772.2	2.6716	9.47328e-11	6.13073e-10	up
AC234782.2	1.09339	0.00459375	0.00915308	up
AC234917.1	1.33801	3.02113e-06	1.04327e-05	up
AC237221.1	1.78148	4.68159e-06	1.5736e-05	up
AC239584.1	1.85382	0.00659371	0.0127321	up
AC239585.2	2.97179	2.21908e-06	7.82703e-06	up
AC239803.1	2.12897	1.08019e-06	4.00183e-06	up
AC239803.3	2.62491	8.08442e-13	6.81587e-12	up
AC239809.3	3.28084	4.01667e-21	8.75284e-20	up
AC239868.2	2.10287	2.82437e-45	4.14082e-43	up
AC242426.3	1.0745	3.7792e-13	3.31079e-12	up
AC243772.2	1.55299	6.99767e-06	2.28395e-05	up
AC243773.2	2.42151	0.0218318	0.0377344	up
AC243830.2	1.11648	1.01588e-05	3.22131e-05	up
AC243965.2	1.20799	8.02619e-07	3.03728e-06	up
AC244090.2	1.60102	2.71951e-05	8.08474e-05	up
AC244093.5	1.08384	0.0028248	0.00587562	up
AC244197.2	1.533	2.28904e-08	1.07848e-07	up
AC244197.3	1.28367	1.14212e-09	5.07676e-09	up
AC244517.1	1.94966	5.49494e-07	2.13159e-06	up
AC244517.2	1.91288	0.0038794	0.00785257	up
AC245014.1	1.0503	0.0048047	0.00954193	up
AC245052.4	1.06975	5.40278e-14	5.2781e-13	up
AC245060.5	1.20189	7.06057e-12	5.31248e-11	up
AC245060.6	1.64309	9.07155e-18	1.37341e-16	up
AC245100.1	2.28071	3.29951e-09	1.73907e-08	up
AC245100.4	1.48473	8.73305e-18	1.32417e-16	up
AC245100.6	7.29567	8.99664e-38	9.01427e-36	up
AC245123.1	-2.55394	3.57127e-11	2.45036e-10	down
AC245128.3	-2.01564	1.96069e-11	1.3878e-10	down
AC245407.1	1.94936	0.000587688	0.00139118	up
AC245595.1	2.44281	5.36246e-15	5.89753e-14	up
AC245884.10	1.42933	8.11172e-05	0.000223182	up
AC245884.11	-1.93511	2.89022e-12	2.2932e-11	down
AC245884.8	1.48344	1.1451e-15	1.36884e-14	up
AC245884.9	1.31156	0.0127865	0.02319	up
AC246817.2	-1.32277	0.000924546	0.00211478	down
AC253536.6	1.43042	7.56119e-09	3.79277e-08	up
AC253576.2	1.34154	4.40987e-08	1.9943e-07	up
AC254629.1	1.05232	0.000974746	0.00221993	up
ACAA1	-1.52967	1.13614e-26	2.71875e-25	down
ACAA2	-1.58642	1.37267e-24	2.69963e-23	down
ACACB	-1.20627	3.20721e-15	2.6735e-14	down
ACAD11	-1.71739	2.87387e-20	3.90135e-19	down
ACADL	-1.43113	3.5799e-07	1.17284e-06	down
ACADM	-1.28315	5.97402e-19	7.16551e-18	down
ACADS	-1.77992	2.53282e-36	1.33374e-34	down
ACADSB	-1.76908	5.40486e-28	1.4627e-26	down
ACAN	3.63517	5.17714e-30	1.69641e-28	up
ACAT1	-1.39858	1.0444e-24	2.07503e-23	down
ACBD6	1.08635	2.5294e-33	1.07312e-31	up
ACBD7	1.6183	2.07798e-09	8.96076e-09	up
ACE	1.00974	3.36379e-11	1.79614e-10	up
ACLY	1.05161	1.19709e-29	3.73367e-28	up
ACOT12	-1.16868	8.95669e-07	2.79085e-06	down
ACOT2	-1.08556	8.69713e-17	8.4497e-16	down
ACOX2	-1.14333	3.05533e-11	1.64091e-10	down
ACP4	3.68049	8.79602e-20	1.1525e-18	up
ACP7	1.15845	0.00389274	0.00724241	up
ACRV1	1.88533	2.61845e-11	1.41764e-10	up
ACSBG2	2.0798	1.28141e-09	5.65504e-09	up
ACSL1	-1.83587	1.81885e-22	3.04411e-21	down
ACSL4	2.17901	9.35439e-16	8.2024e-15	up
ACSL6	1.34014	2.05334e-06	6.10162e-06	up
ACSM1	1.25405	0.00010059	0.000239178	up
ACSM2A	-1.18751	4.02962e-07	1.31045e-06	down
ACSM3	-2.05703	8.95507e-23	1.53715e-21	down
ACSM4	1.2466	0.000145373	0.000338334	up
ACSM5	-1.85875	7.67364e-14	5.51226e-13	down
ACSM6	1.24232	0.000269485	0.000601742	up
ACTA1	1.2564	7.68593e-08	2.74784e-07	up
ACTBL2	1.24024	0.0286149	0.0456162	up
ACTC1	1.39642	0.00071683	0.00149562	up
ACTG2	1.90141	3.89185e-19	4.76213e-18	up
ACTL10	1.2725	3.28746e-09	1.38595e-08	up
ACTL6B	1.41506	1.05578e-06	3.25789e-06	up
ACTL8	6.49269	6.63861e-23	1.14866e-21	up
ACTN1-AS1	1.33061	1.29628e-05	4.03725e-05	up
ACTN2	4.19543	1.76449e-28	5.02725e-27	up
ACVR1C	-1.6683	7.86803e-17	7.6877e-16	down
ACYP1	1.135	5.50611e-27	1.35946e-25	up
ADAM11	2.31035	5.71478e-19	6.87152e-18	up
ADAM12	1.7412	2.00601e-10	9.81585e-10	up
ADAM15	1.33302	6.33569e-30	2.0484e-28	up
ADAM21	1.6087	1.74934e-08	6.7537e-08	up
ADAM22	1.72255	3.12056e-12	1.87552e-11	up
ADAM23	2.68798	3.62915e-16	3.32368e-15	up
ADAM32	1.60454	1.75933e-07	5.99012e-07	up
ADAMDEC1	2.38056	2.81089e-13	1.90574e-12	up
ADAMTS1	-1.55781	1.96488e-17	2.05156e-16	down
ADAMTS13	-2.80787	2.70723e-83	2.3911e-80	down
ADAMTS14	1.31204	2.88941e-09	1.22719e-08	up
ADAMTS16	3.55561	3.48702e-20	4.7053e-19	up
ADAMTS18	3.16277	1.64781e-15	1.40989e-14	up
ADAMTS19	1.92678	0.011948	0.0204638	up
ADAMTS20	3.34512	8.12122e-08	2.89441e-07	up
ADAMTS6	1.29733	3.53918e-09	1.48885e-08	up
ADAMTS9-AS1	-1.02847	1.84039e-06	6.57979e-06	down
ADAMTS9-AS2	-1.036	2.52201e-06	8.80673e-06	down
ADAMTSL2	-1.51482	5.90463e-10	2.74415e-09	down
ADCK5	1.00736	4.33878e-16	3.9451e-15	up
ADCY10P1	1.20621	3.12887e-15	3.5261e-14	up
ADCY6	1.16995	2.85339e-37	1.56622e-35	up
ADCY8	2.35726	4.60785e-05	0.000114745	up
ADGRA1	-1.72707	0.0017407	0.00342726	down
ADGRA3	-1.18722	4.16948e-13	2.77266e-12	down
ADGRB1	1.00446	0.000217126	0.000491779	up
ADGRB2	2.05009	1.2027e-13	8.48569e-13	up
ADGRB3	-1.89607	1.27938e-09	5.64734e-09	down
ADGRD1-AS1	4.71907	2.10857e-08	9.98876e-08	up
ADGRE1	-2.04047	1.30343e-16	1.24763e-15	down
ADGRE4P	-1.08838	9.78954e-07	3.64916e-06	down
ADGRF1	1.41385	0.00551023	0.00999061	up
ADGRF4	1.81046	0.00193698	0.00378647	up
ADGRG1	1.07957	9.64459e-08	3.4024e-07	up
ADGRG2	1.43157	3.15849e-06	9.14643e-06	up
ADGRG4	-2.00936	0.000637077	0.00133929	down
ADGRG5	1.14718	7.41411e-05	0.00017925	up
ADGRG6	-1.32776	2.2025e-13	1.50853e-12	down
ADGRG7	-2.69168	6.18648e-26	1.3865e-24	down
ADGRL1	1.86156	6.20483e-15	5.02568e-14	up
ADH1A	-1.79304	4.94741e-14	3.62493e-13	down
ADH1B	-1.81135	1.61265e-11	8.9709e-11	down
ADH1C	-1.54323	2.42546e-07	8.11034e-07	down
ADH4	-2.37086	9.85148e-14	7.03248e-13	down
ADH6	-1.53147	7.86973e-14	5.64894e-13	down
ADIG	2.443	9.43275e-08	3.3319e-07	up
ADIPOQ	2.00888	0.0101087	0.0174924	up
ADK	-1.11119	1.14711e-21	1.77889e-20	down
ADM	-1.33224	1.7035e-13	1.18175e-12	down
ADM2	2.19397	1.56629e-26	3.71607e-25	up
ADORA1	1.56182	5.39127e-07	1.72356e-06	up
ADRA1A	-3.11484	2.91079e-24	5.56689e-23	down
ADRA1B	-1.56924	7.11519e-13	4.60697e-12	down
ADRA1D	2.25869	6.14969e-09	2.50776e-08	up
ADRA2B	-2.23535	8.56073e-40	5.582e-38	down
ADRA2C	3.33295	1.77431e-28	5.04782e-27	up
ADRB1	-1.33742	4.24167e-06	1.20833e-05	down
ADRB2	-1.01549	1.92921e-06	5.75121e-06	down
AF064860.2	-1.50657	0.0140976	0.0253579	down
AF123462.1	1.58372	0.0073895	0.014117	up
AF127577.3	3.33698	0.000265933	0.000668403	up
AF131216.3	-1.80761	0.0169716	0.030021	down
AF165147.1	-2.47015	1.94737e-24	5.62271e-23	down
AF186192.3	1.53271	0.000551454	0.00131117	up
AF196972.1	1.30419	8.40259e-11	5.47872e-10	up
AF254983.1	2.50173	0.00268426	0.00560963	up
AF274858.3	1.11041	2.42523e-08	1.13807e-07	up
AF279873.3	6.07512	2.49238e-15	2.85116e-14	up
AFAP1-AS1	7.07493	4.50951e-47	7.75131e-45	up
AFF2	3.55419	1.79122e-17	1.87731e-16	up
AFM	-1.90204	7.07115e-15	5.69886e-14	down
AFP	6.03654	5.80606e-42	4.35589e-40	up
AGAP12P	1.03496	0.000152639	0.000400774	up
AGAP1-IT1	-1.15128	3.59097e-05	0.000104511	down
AGBL4	-2.03439	2.53011e-08	9.57031e-08	down
AGL	-1.49876	3.02087e-27	7.67302e-26	down
AGO2	1.02293	7.05439e-21	1.01461e-19	up
AGPAT4	1.36509	1.1567e-11	6.52989e-11	up
AGR2	3.15379	1.70259e-09	7.40443e-09	up
AGTR1	-1.45294	5.67334e-17	5.62156e-16	down
AGXT	-1.20258	7.21751e-08	2.58847e-07	down
AGXT2	-1.79152	5.96938e-14	4.34098e-13	down
AHNAK2	1.63401	4.20943e-07	1.36391e-06	up
AHSA2	1.36007	4.93552e-30	1.61997e-28	up
AHSP	-1.66197	2.96982e-05	7.58799e-05	down
AIF1L	1.19411	1.06466e-09	4.7492e-09	up
AIFM3	1.27552	2.35797e-11	1.28449e-10	up
AIRE	2.79629	8.27729e-10	3.76313e-09	up
AJ003147.1	1.92242	0.00563981	0.0110431	up
AJ009632.2	1.44321	3.69743e-05	0.000107374	up
AK8	1.82907	3.02365e-10	1.44818e-09	up
AKAP14	2.98021	6.29524e-10	2.91175e-09	up
AKAP3	-1.30724	7.48897e-11	3.8446e-10	down
AKNAD1	1.06786	0.00792509	0.0139802	up
AKR1B10	3.63651	9.82582e-23	1.68068e-21	up
AKR1B15	3.88449	1.10071e-20	1.55548e-19	up
AKR1C2	1.03235	1.82758e-05	4.80343e-05	up
AKR1C3	1.60862	2.72072e-29	8.28625e-28	up
AKR1C7P	2.1672	1.53108e-16	1.99923e-15	up
AKR1D1	-1.91091	1.60236e-10	7.9084e-10	down
AKR7A3	-1.46407	6.70272e-09	2.72071e-08	down
AL008582.1	1.8546	1.49308e-11	1.0732e-10	up
AL008718.2	1.02215	0.00140057	0.00310288	up
AL008721.2	1.21618	2.47901e-10	1.52936e-09	up
AL008723.1	1.08036	0.00405238	0.0081699	up
AL008723.3	1.27052	0.00224214	0.00475799	up
AL008729.1	1.33433	1.96118e-14	2.01359e-13	up
AL008733.1	1.8237	0.00801398	0.015208	up
AL021154.1	1.32814	0.00115347	0.00259789	up
AL021328.1	-2.14087	7.96374e-07	3.01536e-06	down
AL021391.1	1.72965	0.000691362	0.00161664	up
AL021392.1	2.02906	2.15123e-13	1.94264e-12	up
AL021453.1	1.58497	2.23035e-35	1.77175e-33	up
AL021707.2	1.56271	5.08096e-22	1.20035e-20	up
AL021707.4	1.51431	1.84757e-06	6.60193e-06	up
AL021807.1	2.36185	3.23889e-18	5.15406e-17	up
AL021937.1	1.22198	0.000112128	0.000302003	up
AL022313.2	1.04527	0.00386878	0.00783461	up
AL022322.1	1.88694	1.74836e-22	4.31442e-21	up
AL022322.2	1.10005	4.22775e-08	1.91671e-07	up
AL022324.3	2.55498	6.07806e-07	2.34049e-06	up
AL022326.1	1.07199	0.0042959	0.00861037	up
AL022329.1	1.30196	0.0154711	0.0275796	up
AL022341.1	1.03359	7.92085e-06	2.55887e-05	up
AL022341.2	1.01946	0.0095359	0.0178	up
AL022344.2	1.10488	0.0160066	0.0284225	up
AL022476.1	1.00953	5.53132e-07	2.14445e-06	up
AL023583.1	1.12043	0.000250104	0.000631964	up
AL023803.2	3.10075	1.44733e-30	7.63445e-29	up
AL023803.3	1.396	2.70777e-05	8.05223e-05	up
AL024498.1	2.00018	1.52104e-16	1.98926e-15	up
AL031123.2	1.32034	1.07952e-14	1.14249e-13	up
AL031186.1	1.56566	3.26745e-17	4.6271e-16	up
AL031283.2	1.49474	0.00470102	0.00935186	up
AL031600.1	1.63547	5.09293e-12	3.91171e-11	up
AL031665.1	2.09378	1.17649e-06	4.3201e-06	up
AL031665.2	1.29557	3.95164e-13	3.45426e-12	up
AL031673.1	1.21581	1.53223e-14	1.59786e-13	up
AL031674.1	1.81272	0.0026715	0.00558472	up
AL031705.1	1.86596	5.9833e-08	2.66476e-07	up
AL031709.1	1.53793	7.74223e-09	3.8748e-08	up
AL031710.2	1.20244	0.000307894	0.000764425	up
AL031717.1	1.34557	6.15059e-06	2.02571e-05	up
AL031722.1	-1.08759	4.86371e-08	2.18631e-07	down
AL031848.1	1.16554	0.00484935	0.00962484	up
AL031963.2	1.04374	0.00203308	0.00435092	up
AL031985.3	1.01712	2.03915e-16	2.62483e-15	up
AL032821.1	1.22001	0.00929472	0.0173869	up
AL033380.1	2.18389	6.07342e-06	2.00294e-05	up
AL033381.1	2.07043	0.000204828	0.00052589	up
AL033381.2	2.20879	0.000141248	0.000373422	up
AL033384.1	2.13105	1.96807e-08	9.35879e-08	up
AL033384.2	2.40361	3.19035e-10	1.93586e-09	up
AL033397.2	1.04167	1.84152e-05	5.60666e-05	up
AL033527.2	1.23758	0.000635764	0.00149522	up
AL033527.3	2.87573	1.54698e-11	1.10875e-10	up
AL035045.1	3.1556	1.35568e-07	5.7476e-07	up
AL035252.3	1.50239	3.79469e-12	2.95441e-11	up
AL035401.1	3.89898	8.73934e-13	7.32466e-12	up
AL035427.1	1.74029	3.7634e-06	1.28315e-05	up
AL035446.1	2.44936	5.05368e-10	2.99007e-09	up
AL035461.2	1.734	4.32258e-20	8.43327e-19	up
AL035563.1	1.43327	4.37715e-16	5.45134e-15	up
AL035661.1	-1.23213	0.000120242	0.000322072	down
AL035701.1	1.52706	3.95923e-09	2.06333e-08	up
AL035706.1	-1.08999	0.000971242	0.00221372	down
AL049539.1	1.75337	5.74761e-07	2.22312e-06	up
AL049543.1	1.94936	2.41191e-05	7.22522e-05	up
AL049646.1	1.45791	0.0120553	0.0220079	up
AL049650.1	1.31061	6.93413e-06	1.92152e-05	up
AL049794.1	1.06181	1.16559e-05	3.65763e-05	up
AL049795.1	1.5396	1.32648e-08	6.45878e-08	up
AL049820.1	-1.69403	0.00179763	0.0038871	down
AL049830.3	3.1202	2.6439e-14	2.6665e-13	up
AL049836.1	1.95449	0.000353317	0.00086812	up
AL078581.1	-1.15145	1.38663e-15	1.63501e-14	down
AL078587.1	1.51448	9.36012e-06	2.98562e-05	up
AL078590.3	-1.58183	2.22933e-11	1.56737e-10	down
AL078601.2	1.52219	0.00739211	0.0141207	up
AL078604.2	1.57398	2.92942e-09	1.55427e-08	up
AL078612.2	2.07412	0.000719699	0.0016768	up
AL080312.2	1.96507	5.0494e-05	0.000143419	up
AL080317.1	1.05953	1.24731e-15	1.48213e-14	up
AL080317.2	1.19678	1.8665e-10	1.16483e-09	up
AL080317.3	1.25645	3.03634e-15	3.42818e-14	up
AL109610.1	1.73819	0.00284264	0.00590657	up
AL109615.2	1.43556	0.0107982	0.0198951	up
AL109615.3	3.74676	7.19084e-27	2.68498e-25	up
AL109659.2	1.02323	1.12182e-05	3.53197e-05	up
AL109754.1	3.04742	2.02244e-09	1.1048e-08	up
AL109811.1	1.3653	1.63883e-09	9.09197e-09	up
AL109917.1	1.11422	1.17179e-07	5.00194e-07	up
AL109933.1	-1.20449	0.000204374	0.000525131	down
AL109945.1	1.58962	8.65848e-06	2.77961e-05	up
AL109976.1	2.08745	3.28128e-12	2.58292e-11	up
AL110115.2	1.72565	1.14273e-07	4.88319e-07	up
AL110292.1	3.06432	5.19459e-07	2.02334e-06	up
AL117190.1	1.45285	0.00226489	0.00480268	up
AL117328.2	1.30885	8.79781e-05	0.00024063	up
AL117329.1	4.80914	8.516e-17	1.15589e-15	up
AL117335.1	1.57494	2.10791e-10	1.30893e-09	up
AL117336.3	1.07694	2.0647e-13	1.87128e-12	up
AL117338.1	1.51374	0.016717	0.0296049	up
AL117339.4	1.29506	1.11482e-08	5.47634e-08	up
AL117350.1	1.68541	5.61737e-08	2.51301e-07	up
AL117379.1	1.63673	1.22524e-19	2.2896e-18	up
AL117382.1	1.07704	0.00013057	0.000347033	up
AL118505.1	2.48511	1.10164e-10	7.06776e-10	up
AL118511.1	1.21677	8.53011e-08	3.71277e-07	up
AL118511.2	3.55486	6.26038e-16	7.68631e-15	up
AL121583.1	1.3924	5.07208e-10	2.99917e-09	up
AL121601.1	1.27171	1.41876e-07	6.00101e-07	up
AL121652.1	1.52075	1.96472e-05	5.96173e-05	up
AL121658.1	1.81638	2.52672e-15	2.88547e-14	up
AL121672.1	1.39593	6.2675e-08	2.78158e-07	up
AL121672.3	1.49627	2.80442e-05	8.31483e-05	up
AL121721.1	3.47071	1.34261e-07	5.69581e-07	up
AL121757.1	1.86615	0.000364779	0.000894629	up
AL121758.1	1.303	3.12941e-08	1.17005e-07	up
AL121772.1	2.13415	4.05296e-16	5.06658e-15	up
AL121772.3	1.63352	2.02649e-12	1.63125e-11	up
AL121782.1	1.5029	2.2887e-06	8.04699e-06	up
AL121790.1	-1.32549	1.03348e-05	3.2743e-05	down
AL121790.2	1.12899	0.00304468	0.00629032	up
AL121832.2	1.20686	3.19391e-12	2.51912e-11	up
AL121832.3	2.23365	4.97972e-23	1.27787e-21	up
AL121845.4	1.20483	2.28522e-06	8.03616e-06	up
AL121852.1	1.14137	0.000895793	0.00205372	up
AL121890.2	1.25062	0.000540988	0.00128859	up
AL121890.4	1.18779	0.000435018	0.00105329	up
AL121890.5	1.19117	0.000128756	0.000342623	up
AL121892.1	-3.03596	3.80103e-16	4.7756e-15	down
AL121895.1	1.03559	0.00549413	0.0107833	up
AL121895.2	1.30653	0.000223222	0.00056971	up
AL121899.1	2.31499	9.70063e-26	3.16564e-24	up
AL121906.1	1.62325	0.000237133	0.000602242	up
AL121906.2	2.85794	1.09725e-34	8.35045e-33	up
AL121917.2	1.15018	0.00123456	0.0027652	up
AL121929.2	1.63659	2.2655e-06	7.97525e-06	up
AL121970.1	2.16374	0.00120024	0.002695	up
AL121974.1	1.50442	0.0199198	0.0348037	up
AL121992.1	1.20982	3.88212e-05	0.000112329	up
AL122019.1	1.22943	0.0180499	0.0317846	up
AL122125.1	1.35037	1.93614e-07	8.04432e-07	up
AL132655.2	2.73484	2.66777e-08	1.24398e-07	up
AL132765.2	1.57426	0.000915605	0.00209625	up
AL133215.1	1.76955	2.76631e-07	1.12268e-06	up
AL133215.2	2.64345	6.10452e-18	9.4575e-17	up
AL133255.1	1.72324	3.75112e-06	1.2794e-05	up
AL133264.2	-1.69003	2.2296e-09	1.20739e-08	down
AL133279.1	-1.14436	0.000112082	0.00030192	down
AL133297.2	1.25516	0.0115346	0.0211329	up
AL133325.3	2.99705	6.89002e-09	3.47534e-08	up
AL133338.1	1.04999	7.53465e-09	3.78041e-08	up
AL133367.1	2.10411	4.98004e-32	2.99991e-30	up
AL133370.1	4.29055	1.02415e-12	8.53347e-12	up
AL133372.2	2.50575	0.0036668	0.0074624	up
AL133396.2	1.32177	0.000707339	0.00165071	up
AL133410.1	1.84706	1.42137e-15	1.67399e-14	up
AL133467.2	3.63602	2.21751e-08	1.04626e-07	up
AL133467.4	4.04108	1.81428e-09	9.99309e-09	up
AL135744.1	1.32022	5.75154e-06	1.90182e-05	up
AL135787.1	1.04564	0.00780376	0.0148487	up
AL135999.1	1.28332	9.24558e-16	1.11591e-14	up
AL136084.3	3.78342	6.40052e-24	1.75062e-22	up
AL136162.1	2.17548	1.9728e-26	7.01171e-25	up
AL136172.1	1.25121	0.000811597	0.0018734	up
AL136295.3	-1.40597	1.69023e-11	9.37831e-11	down
AL136295.6	1.02908	1.35054e-12	1.11e-11	up
AL136307.1	1.13111	0.0238105	0.0408007	up
AL136379.1	1.97935	3.79406e-07	1.51179e-06	up
AL136528.1	2.43766	2.52542e-08	1.18231e-07	up
AL136537.2	5.46476	8.67394e-15	9.31757e-14	up
AL136985.2	1.35589	7.84335e-06	2.53672e-05	up
AL136987.1	5.1659	2.01504e-29	9.72829e-28	up
AL137002.1	1.07392	8.86596e-05	0.000242395	up
AL137024.1	1.58069	0.00867865	0.0163511	up
AL137026.2	4.14209	1.3031e-13	1.20681e-12	up
AL137060.1	2.67759	1.62188e-26	5.82677e-25	up
AL137186.1	1.17144	0.00482852	0.00958637	up
AL137186.2	1.1001	3.3628e-12	2.64292e-11	up
AL137230.1	1.40347	2.67376e-09	1.42889e-08	up
AL137244.1	1.01454	0.000246211	0.000622917	up
AL137802.2	1.24181	8.58848e-06	2.75891e-05	up
AL138720.1	1.58315	0.000708779	0.00165387	up
AL138737.1	2.01362	0.000155504	0.000407545	up
AL138749.1	-1.70909	0.0177132	0.0312413	down
AL138760.1	2.15881	0.000151901	0.000398994	up
AL138762.1	1.36084	5.2832e-13	4.54059e-12	up
AL138781.1	1.1992	5.97071e-08	2.66061e-07	up
AL138789.1	1.08544	0.0247156	0.0421957	up
AL138828.1	4.27379	3.17263e-28	1.33458e-26	up
AL138900.2	1.93711	0.0151746	0.0270996	up
AL138924.1	1.52023	0.000244564	0.000619064	up
AL138960.1	2.00856	2.78553e-05	8.26622e-05	up
AL138966.2	1.51411	8.11332e-07	3.06385e-06	up
AL138974.1	3.58399	4.97957e-08	2.23621e-07	up
AL139002.1	2.36434	0.000236296	0.000600345	up
AL139011.2	-1.19364	6.16934e-09	2.51524e-08	down
AL139023.1	4.9539	1.58361e-16	2.06511e-15	up
AL139041.1	1.59085	8.35168e-07	3.14553e-06	up
AL139042.1	3.83846	5.21493e-06	1.74055e-05	up
AL139089.1	1.68164	1.72338e-23	4.55736e-22	up
AL139095.4	-1.15813	1.15079e-10	7.36145e-10	down
AL139123.1	1.85622	4.66602e-13	4.03451e-12	up
AL139130.1	3.69919	4.53102e-15	5.02749e-14	up
AL139220.2	1.99039	1.32297e-13	1.22407e-12	up
AL139246.1	1.32234	0.0030127	0.00623006	up
AL139246.3	1.44758	2.92551e-10	1.7864e-09	up
AL139246.4	2.00461	8.48454e-05	0.0002327	up
AL139275.2	3.06489	2.99675e-05	8.84432e-05	up
AL139286.2	2.02812	1.81311e-12	1.46958e-11	up
AL139289.1	1.22734	6.97097e-11	4.59941e-10	up
AL139289.2	1.1973	7.61891e-10	4.3931e-09	up
AL139349.1	1.19944	1.20385e-08	5.8818e-08	up
AL139351.1	-1.44082	0.000435296	0.0010537	down
AL139385.1	-1.66655	4.91775e-09	2.52784e-08	down
AL139412.1	2.35105	2.11884e-22	5.18374e-21	up
AL157395.1	1.25144	0.0045892	0.00914767	up
AL157396.1	-1.15985	0.01185	0.0216608	down
AL157700.1	1.18591	3.34367e-05	9.78276e-05	up
AL157714.2	2.59802	0.000244976	0.000619949	up
AL157778.1	4.8744	9.53606e-13	7.95896e-12	up
AL157823.2	1.51938	7.63805e-07	2.90307e-06	up
AL157832.2	-2.03326	9.8914e-12	7.25091e-11	down
AL157834.1	1.43171	3.31633e-05	9.7099e-05	up
AL157834.2	1.38392	0.00559281	0.0109619	up
AL157884.2	1.08169	0.0139805	0.0251586	up
AL157896.1	1.59024	0.000225622	0.000575205	up
AL157904.1	1.45462	0.000113624	0.000305537	up
AL157931.1	2.33233	0.00298068	0.00616832	up
AL158063.1	1.67709	6.89512e-11	4.55087e-10	up
AL158071.3	1.61774	6.33884e-08	2.80805e-07	up
AL158166.1	1.23988	0.00034944	0.00085944	up
AL158196.1	1.18022	0.000149971	0.000394338	up
AL158211.3	1.95863	7.09462e-07	2.70788e-06	up
AL158212.2	1.64718	6.75742e-09	3.41273e-08	up
AL158212.3	1.4851	3.97618e-24	1.11194e-22	up
AL158819.1	4.75547	3.25193e-12	2.56285e-11	up
AL158835.2	1.13929	0.000716312	0.00166969	up
AL158839.1	1.77271	9.27948e-06	2.9637e-05	up
AL159169.3	1.24301	0.000451244	0.00108901	up
AL159972.1	-1.08232	0.000764068	0.00177087	down
AL160006.1	1.2266	1.65363e-19	3.03327e-18	up
AL160162.1	2.6512	0.00342589	0.00701684	up
AL160286.2	1.48631	0.00287418	0.0059665	up
AL160290.2	2.43153	1.29449e-06	4.72408e-06	up
AL160291.1	1.49141	1.62191e-05	4.98141e-05	up
AL160314.2	1.59109	1.75452e-13	1.60401e-12	up
AL160408.1	1.78932	2.70145e-05	8.03584e-05	up
AL160408.4	3.37999	6.1988e-05	0.000173544	up
AL161452.1	1.00659	1.9691e-07	8.16763e-07	up
AL161630.1	-1.00518	0.021159	0.0367148	down
AL161645.1	-1.32252	2.77983e-05	8.25177e-05	down
AL161668.3	-1.94047	1.55605e-14	1.61932e-13	down
AL161669.3	1.35722	8.41876e-12	6.22864e-11	up
AL161725.2	1.61534	0.00129189	0.00288068	up
AL161729.4	2.19382	2.09091e-09	1.13909e-08	up
AL161740.1	-1.66331	1.14673e-16	1.52711e-15	down
AL161752.1	2.08968	9.73091e-05	0.000264663	up
AL161772.1	1.90988	5.04787e-09	2.59072e-08	up
AL161782.1	-2.41802	0.00194044	0.00416563	down
AL161891.1	1.14056	9.72683e-11	6.28665e-10	up
AL162293.1	1.51786	0.000299121	0.00074422	up
AL162413.1	6.2948	1.88421e-21	4.21654e-20	up
AL162431.1	1.52614	0.000289056	0.00072206	up
AL162431.2	2.35176	2.17144e-37	2.09161e-35	up
AL162574.2	1.2467	0.00614354	0.0119345	up
AL162582.1	4.57206	1.79143e-22	4.40978e-21	up
AL162632.3	1.35199	3.89682e-07	1.55025e-06	up
AL162726.3	2.91734	2.52623e-14	2.55817e-13	up
AL162726.4	2.12335	0.00176067	0.00381587	up
AL162741.1	1.13106	8.57164e-07	3.22228e-06	up
AL163636.2	-1.35928	4.7412e-18	5.21962e-17	down
AL163952.1	3.23965	2.37269e-11	1.6623e-10	up
AL163953.1	3.71725	1.78907e-18	2.95301e-17	up
AL353148.1	-1.67716	6.02237e-05	0.000168818	down
AL353150.1	1.60583	1.50808e-09	8.39699e-09	up
AL353593.3	1.28995	0.0246691	0.0421236	up
AL353622.1	1.00004	1.92763e-09	1.05707e-08	up
AL353622.2	1.74888	6.03875e-07	2.32625e-06	up
AL353693.1	-1.34383	0.00102395	0.0023235	down
AL353708.1	1.13143	1.47907e-12	1.21114e-11	up
AL353708.3	2.47365	3.91267e-33	2.5495e-31	up
AL353747.3	2.28478	3.85187e-05	0.000111534	up
AL353747.4	1.54003	0.00412818	0.00830765	up
AL353801.1	1.89121	4.44264e-07	1.75063e-06	up
AL353801.3	1.68427	7.42046e-12	5.56646e-11	up
AL353803.1	1.58457	0.000746095	0.00173263	up
AL353803.2	1.80109	0.000286825	0.000716848	up
AL353803.4	1.28775	0.00380209	0.00771445	up
AL353807.2	1.63229	2.01365e-07	8.3351e-07	up
AL353997.2	1.03092	0.00755707	0.014415	up
AL354704.1	3.26353	2.26341e-05	6.81105e-05	up
AL354707.1	-1.02007	7.5022e-06	2.43626e-05	down
AL354714.1	1.76817	5.519e-05	0.000155781	up
AL354719.2	1.40227	1.25165e-06	4.57669e-06	up
AL354760.1	1.23617	1.16443e-08	5.70178e-08	up
AL354824.2	1.58733	0.000237636	0.000603441	up
AL354872.2	-1.02352	4.04695e-05	0.000116725	down
AL354928.1	1.41246	5.53953e-08	2.4793e-07	up
AL354950.1	1.09258	0.000970926	0.0022135	up
AL354977.1	1.41359	0.00036864	0.000903209	up
AL354984.1	2.2553	1.4793e-05	4.57655e-05	up
AL354989.1	1.05647	0.000207405	0.000531752	up
AL354993.1	1.14533	5.46855e-05	0.000154444	up
AL354993.2	1.40391	0.00574029	0.0112247	up
AL355073.2	-1.48088	1.40493e-05	4.35999e-05	down
AL355075.2	1.05777	3.01542e-05	8.88758e-05	up
AL355075.4	-1.35435	0.000985727	0.00224289	down
AL355102.2	1.87622	0.00111447	0.00225999	up
AL355102.4	2.03851	1.38373e-10	8.75599e-10	up
AL355297.3	1.31466	3.19172e-06	1.09989e-05	up
AL355303.1	1.07613	2.41974e-06	8.47782e-06	up
AL355340.1	1.29035	0.000117955	0.000316329	up
AL355376.2	2.10425	0.00439013	0.00878511	up
AL355385.1	1.16839	1.45077e-06	5.25846e-06	up
AL355388.2	2.54603	8.759e-18	1.3271e-16	up
AL355472.1	1.06238	1.06688e-10	6.87096e-10	up
AL355472.3	1.51167	0.00126582	0.00282887	up
AL355472.4	1.92955	6.37477e-06	2.09539e-05	up
AL355482.1	1.88168	4.31038e-09	2.23291e-08	up
AL355482.2	1.65652	0.00584478	0.0114131	up
AL355488.2	1.89664	7.7133e-36	6.38155e-34	up
AL355574.1	1.3435	9.49096e-14	8.92222e-13	up
AL355596.1	2.75352	6.58188e-06	2.15849e-05	up
AL355601.1	3.05752	1.09851e-06	4.05989e-06	up
AL355607.1	1.97744	1.84671e-07	7.69358e-07	up
AL355802.1	1.03746	4.00374e-11	2.72738e-10	up
AL355802.3	1.62465	1.84695e-16	2.38976e-15	up
AL355803.1	1.51264	1.02431e-08	5.05164e-08	up
AL355810.1	1.78759	4.20938e-06	1.42473e-05	up
AL355916.1	1.58486	1.71019e-05	5.23159e-05	up
AL356019.2	1.01056	1.49074e-08	7.2163e-08	up
AL356055.1	-1.10812	0.000752607	0.00174593	down
AL356056.1	1.68745	0.000239444	0.000607568	up
AL356056.2	1.17809	2.6521e-06	9.22545e-06	up
AL356108.1	1.48798	0.000387984	0.000946533	up
AL356124.1	1.49804	8.60485e-05	0.000235773	up
AL356215.1	2.34594	4.4775e-07	1.76262e-06	up
AL356258.1	1.34126	0.000239152	0.000606983	up
AL356310.1	2.16418	7.54902e-07	2.87197e-06	up
AL356364.1	2.89277	0.000354355	0.000870349	up
AL356417.2	2.10306	2.44548e-06	8.55595e-06	up
AL356488.2	-1.20119	0.00685246	0.0131833	down
AL356512.1	1.21108	1.13876e-10	7.28914e-10	up
AL356652.1	1.17736	2.52032e-06	8.80234e-06	up
AL356740.2	1.4802	0.0107381	0.0198027	up
AL356740.3	2.40296	2.28665e-05	6.87686e-05	up
AL356966.1	1.3545	3.59257e-07	1.43643e-06	up
AL357033.2	-2.13049	2.96197e-06	1.0239e-05	down
AL357055.3	-1.51365	2.12536e-24	6.07999e-23	down
AL357060.1	4.32803	8.33131e-25	2.50594e-23	up
AL357078.3	1.25885	0.000136289	0.000361318	up
AL357079.1	1.41114	1.39726e-12	1.14744e-11	up
AL357153.1	2.25081	1.01176e-05	3.21028e-05	up
AL357673.2	1.20246	0.0044021	0.00880552	up
AL357992.1	1.37203	0.00577236	0.0112794	up
AL358072.1	1.73165	2.33039e-13	2.09588e-12	up
AL358075.2	2.84072	7.55661e-15	8.15762e-14	up
AL358115.1	1.07102	7.67458e-05	0.000211768	up
AL358176.4	-1.16931	0.0176976	0.0312167	down
AL358216.1	-2.1024	8.10786e-09	4.04967e-08	down
AL358394.1	2.6628	0.00299291	0.00619169	up
AL358473.1	2.50038	4.04551e-09	2.1039e-08	up
AL358613.2	-2.25478	1.0985e-09	6.21888e-09	down
AL358933.1	1.01802	5.32476e-05	0.000150725	up
AL359265.3	1.09766	9.60139e-08	4.14913e-07	up
AL359313.1	5.03077	3.09044e-19	5.54138e-18	up
AL359397.1	1.52438	3.33778e-05	9.76951e-05	up
AL359513.1	1.58865	7.36561e-14	7.04717e-13	up
AL359541.1	-1.08128	8.63757e-07	3.24462e-06	down
AL359551.1	3.44187	3.09146e-07	1.24602e-06	up
AL359636.1	1.46442	0.00359561	0.0073328	up
AL359636.2	2.08161	6.1619e-06	2.0291e-05	up
AL359644.1	1.04614	0.00167544	0.0036494	up
AL359694.2	1.44957	0.00166399	0.00362724	up
AL359710.1	-1.00984	1.91154e-06	6.8122e-06	down
AL359715.4	-1.58062	1.52761e-26	5.51794e-25	down
AL359815.1	1.22222	0.00513874	0.0101397	up
AL359851.1	2.12941	3.26822e-07	1.31487e-06	up
AL359878.1	2.45564	2.08625e-19	3.80236e-18	up
AL359878.2	1.65556	7.82003e-07	2.96715e-06	up
AL359881.1	3.27143	6.15339e-10	3.5938e-09	up
AL359881.2	2.78004	5.23701e-07	2.03858e-06	up
AL359881.3	2.5451	2.05194e-05	6.20938e-05	up
AL359921.2	1.20793	5.78909e-16	7.13844e-15	up
AL360014.1	-1.78282	8.22327e-05	0.000226126	down
AL360091.1	1.07754	0.000685671	0.00160446	up
AL360181.3	1.2063	4.24839e-05	0.000106297	up
AL360267.1	-1.82146	0.00613334	0.011917	down
AL360270.3	1.09609	3.96747e-07	1.5771e-06	up
AL360294.1	1.2531	0.0113019	0.0207274	up
AL365181.2	3.74566	1.15629e-28	5.18097e-27	up
AL365181.3	3.76882	1.592e-36	1.40455e-34	up
AL365203.3	1.00059	6.3769e-11	4.23689e-10	up
AL365226.1	1.61766	0.000355443	0.000872913	up
AL365226.2	4.13038	7.59698e-11	4.98277e-10	up
AL365275.1	1.23543	0.000310135	0.000769509	up
AL365295.1	1.15479	2.33848e-06	8.21188e-06	up
AL365356.4	1.5157	3.76719e-07	1.50168e-06	up
AL365361.1	-1.09533	1.80711e-06	6.46894e-06	down
AL365436.2	1.07816	0.00346777	0.00709855	up
AL390037.1	1.08692	0.0143782	0.025823	up
AL390067.1	1.50544	1.10061e-07	4.71226e-07	up
AL390115.1	1.79292	4.2118e-05	0.000121104	up
AL390334.1	3.96991	2.23232e-10	1.3836e-09	up
AL390719.1	1.28874	1.58792e-07	6.6726e-07	up
AL390728.4	1.52567	3.70143e-20	7.26406e-19	up
AL390728.6	1.27652	1.15605e-16	1.5367e-15	up
AL390778.2	-1.83411	0.0104457	0.0193189	down
AL390783.1	1.43453	0.0024495	0.00515359	up
AL391056.1	3.718	1.57996e-20	3.26455e-19	up
AL391069.4	1.37021	0.000144615	0.000381666	up
AL391095.2	-1.30179	1.75532e-08	8.41735e-08	down
AL391244.2	1.95933	1.3073e-10	8.30307e-10	up
AL391427.1	1.36372	1.18042e-09	6.65809e-09	up
AL391832.1	2.4137	6.87297e-13	5.85142e-12	up
AL391832.3	1.28699	1.01333e-05	3.21476e-05	up
AL391845.2	4.26618	1.00277e-37	9.99713e-36	up
AL392089.1	-1.99889	1.74741e-12	1.41979e-11	down
AL441992.1	1.02455	5.52937e-12	4.23063e-11	up
AL442067.1	1.38674	7.19202e-05	0.000199613	up
AL442125.1	1.06314	4.50304e-07	1.77093e-06	up
AL442125.2	1.22806	0.000359898	0.000883417	up
AL442128.2	1.37424	6.20347e-09	3.14895e-08	up
AL442647.1	1.51446	0.00126102	0.00281972	up
AL445070.1	1.92208	0.0122424	0.0223107	up
AL445190.1	-1.14701	7.79559e-05	0.000214988	down
AL445209.1	3.22635	6.14352e-08	2.73184e-07	up
AL445224.1	-1.67564	4.71302e-06	1.58337e-05	down
AL445228.2	3.13011	2.6943e-17	3.85101e-16	up
AL445238.1	2.33402	6.4568e-05	0.000180437	up
AL445250.1	1.15074	0.000694933	0.00162403	up
AL445309.1	1.03537	1.85853e-06	6.63633e-06	up
AL445426.1	-1.18931	0.000398457	0.000969592	down
AL445430.2	1.16257	0.00977687	0.018195	up
AL445483.1	2.16866	6.36334e-10	3.70882e-09	up
AL445488.1	2.06572	7.47743e-08	3.27388e-07	up
AL445524.1	2.23281	4.54146e-27	1.74139e-25	up
AL445647.1	3.73336	6.45489e-11	4.28442e-10	up
AL445673.1	1.98371	1.863e-08	8.89733e-08	up
AL449423.1	1.22048	0.0053652	0.0105521	up
AL450003.2	1.4266	0.00356482	0.00727821	up
AL450263.1	1.58676	1.47371e-05	4.56208e-05	up
AL450306.1	1.55949	1.70432e-09	9.4317e-09	up
AL450322.1	1.95803	0.00106653	0.00241352	up
AL450322.2	2.6061	2.04997e-07	8.47841e-07	up
AL450468.2	1.47059	0.00352288	0.00719759	up
AL450992.1	1.23226	0.00168832	0.00367465	up
AL450992.2	1.48212	1.79082e-19	3.27588e-18	up
AL450998.2	2.6244	1.71849e-11	1.22244e-10	up
AL451049.1	1.37793	0.0158994	0.0282523	up
AL451050.2	2.35413	7.26e-23	1.84404e-21	up
AL451069.1	1.9725	2.73645e-05	8.13267e-05	up
[truncated: 5,705 more rows]

## Sheet: SE-related genes
Table S2 List of 724 selected SE-related genes in HepG2 and HuH7 cell lines from SEdb
cell line	sample_ID	SE ID	chr	start	end	closest gene
HepG2	Sample_01_038	SE_01_03800001	chr2	20769100	20836168	HS1BP3
HepG2	Sample_01_038	SE_01_03800002	chr1	234734400	234780659	NCRNA00184
HepG2	Sample_01_038	SE_01_03800003	chr2	47256672	47308515	C2orf61
HepG2	Sample_01_038	SE_01_03800004	chr1	235090298	235134742	SNORA14B
HepG2	Sample_01_038	SE_01_03800005	chr17	53342381	53388541	HLF
HepG2	Sample_01_038	SE_01_03800006	chr8	17748501	17782688	FGL1
HepG2	Sample_01_038	SE_01_03800007	chr6	3354837	3420649	SLC22A23
HepG2	Sample_01_038	SE_01_03800008	chr14	23435441	23453093	JUB
HepG2	Sample_01_038	SE_01_03800009	chr14	35007497	35032587	EAPP
HepG2	Sample_01_038	SE_01_03800010	chr3	149057995	149132894	TM4SF1
HepG2	Sample_01_038	SE_01_03800011	chr18	56058259	56098869	MIR122
HepG2	Sample_01_038	SE_01_03800012	chr20	52719471	52758851	CYP24A1
HepG2	Sample_01_038	SE_01_03800013	chr1	234849745	234863569	NCRNA00184
HepG2	Sample_01_038	SE_01_03800014	chr20	45945401	45990503	ZMYND8
HepG2	Sample_01_038	SE_01_03800015	chr20	30281609	30312175	BCL2L1
HepG2	Sample_01_038	SE_01_03800016	chr17	57904968	57935071	MIR21
HepG2	Sample_01_038	SE_01_03800017	chr17	70382512	70424203	LOC100499467
HepG2	Sample_01_038	SE_01_03800018	chr6	158402816	158470397	SYNJ2
HepG2	Sample_01_038	SE_01_03800019	chr6	167616239	167656370	TCP10L2
HepG2	Sample_01_038	SE_01_03800020	chr19	51842208	51870907	ETFB
HepG2	Sample_01_038	SE_01_03800021	chr8	121819044	121881230	SNTB1
HepG2	Sample_01_038	SE_01_03800022	chr2	54758575	54818843	SPTBN1
HepG2	Sample_01_038	SE_01_03800023	chr6	64218918	64240544	PTP4A1
HepG2	Sample_01_038	SE_01_03800024	chr11	1675456	1715393	FAM99A
HepG2	Sample_01_038	SE_01_03800025	chr17	56430976	56495049	RNF43
HepG2	Sample_01_038	SE_01_03800026	chr17	79916062	79975550	ASPSCR1
HepG2	Sample_01_038	SE_01_03800027	chr2	114723404	114739007	LOC440900
HepG2	Sample_01_038	SE_01_03800028	chr2	8258143	8281483	LOC339788
HepG2	Sample_01_038	SE_01_03800029	chr6	155634262	155662357	TFB1M
HepG2	Sample_01_038	SE_01_03800030	chr20	30175202	30200075	ID1
HepG2	Sample_01_038	SE_01_03800031	chr17	53471377	53533184	MMD
HepG2	Sample_01_038	SE_01_03800032	chr2	75741848	75769041	FAM176A
HepG2	Sample_01_038	SE_01_03800033	chr6	30707788	30762073	IER3
HepG2	Sample_01_038	SE_01_03800034	chr2	138719392	138734346	HNMT
HepG2	Sample_01_038	SE_01_03800035	chr8	121754886	121799441	SNTB1
HepG2	Sample_01_038	SE_01_03800036	chr6	11187811	11235000	NEDD9
HepG2	Sample_01_038	SE_01_03800037	chr20	49004323	49040425	PTPN1
HepG2	Sample_01_038	SE_01_03800038	chr13	97871161	97931284	MBNL2
HepG2	Sample_01_038	SE_01_03800039	chr4	74240588	74306760	ALB
HepG2	Sample_01_038	SE_01_03800040	chr18	3592718	3625893	FLJ35776
HepG2	Sample_01_038	SE_01_03800041	chr17	75277478	75304240	2023-09-09
HepG2	Sample_01_038	SE_01_03800042	chr2	11479708	11515156	ROCK2
HepG2	Sample_01_038	SE_01_03800043	chr20	14958340	14973858	MACROD2
HepG2	Sample_01_038	SE_01_03800044	chr1	92280880	92312802	TGFBR3
HepG2	Sample_01_038	SE_01_03800045	chr17	66373155	66396497	MIR635
HepG2	Sample_01_038	SE_01_03800046	chr3	30619264	30674591	TGFBR2
HepG2	Sample_01_038	SE_01_03800047	chr6	167721274	167734934	TTLL2
HepG2	Sample_01_038	SE_01_03800048	chr17	41602619	41637786	ETV4
HepG2	Sample_01_038	SE_01_03800049	chr6	31701526	31715819	MSH5
HepG2	Sample_01_038	SE_01_03800050	chr7	45911951	45934263	IGFBP1
HepG2	Sample_01_038	SE_01_03800051	chr16	70714270	70794877	LOC100130894
HepG2	Sample_01_038	SE_01_03800052	chr2	42318493	42375368	EML4
HepG2	Sample_01_038	SE_01_03800053	chr1	17074365	17095387	MST1P9
HepG2	Sample_01_038	SE_01_03800054	chr2	128923880	128954624	UGGT1
HepG2	Sample_01_038	SE_01_03800055	chr8	40009786	40034133	C8orf4
HepG2	Sample_01_038	SE_01_03800056	chr6	168067415	168086631	C6orf123
HepG2	Sample_01_038	SE_01_03800057	chr2	43199362	43246306	HAAO
HepG2	Sample_01_038	SE_01_03800058	chr2	169008785	169079228	STK39
HepG2	Sample_01_038	SE_01_03800059	chr15	60663053	60695830	ANXA2
HepG2	Sample_01_038	SE_01_03800060	chr1	16968738	16986089	MST1P2
HepG2	Sample_01_038	SE_01_03800061	chr2	11622860	11654776	E2F6
HepG2	Sample_01_038	SE_01_03800062	chr1	117007812	117052585	ATP1A1OS
HepG2	Sample_01_038	SE_01_03800063	chr18	68039630	68050758	SOCS6
HepG2	Sample_01_038	SE_01_03800064	chr17	48760230	48772443	ANKRD40
HepG2	Sample_01_038	SE_01_03800065	chr16	54194443	54216901	IRX3
HepG2	Sample_01_038	SE_01_03800066	chr2	235581990	235604217	ARL4C
HepG2	Sample_01_038	SE_01_03800067	chr7	75525997	75593190	SNORA14A
HepG2	Sample_01_038	SE_01_03800068	chr10	45457958	45493322	C10orf10
HepG2	Sample_01_038	SE_01_03800069	chr1	234949401	234955014	NCRNA00184
HepG2	Sample_01_038	SE_01_03800070	chr6	137670239	137692525	OLIG3
HepG2	Sample_01_038	SE_01_03800071	chr20	43020794	43064823	MIR3646
HepG2	Sample_01_038	SE_01_03800072	chr11	65239110	65268881	MALAT1
HepG2	Sample_01_038	SE_01_03800073	chr14	21139308	21157871	ANG
HepG2	Sample_01_038	SE_01_03800074	chr6	3787473	3807875	C6orf145
HepG2	Sample_01_038	SE_01_03800075	chr20	10519861	10549255	C20orf94
HepG2	Sample_01_038	SE_01_03800076	chr2	219595761	219630654	CYP27A1
HepG2	Sample_01_038	SE_01_03800077	chr3	171505941	171564703	PLD1
HepG2	Sample_01_038	SE_01_03800078	chr17	74341386	74382341	PRPSAP1
HepG2	Sample_01_038	SE_01_03800079	chr9	93947634	93975237	LOC100129316
HepG2	Sample_01_038	SE_01_03800080	chr10	7727838	7751697	ITIH2
HepG2	Sample_01_038	SE_01_03800081	chr1	45271836	45293399	BTBD19
HepG2	Sample_01_038	SE_01_03800082	chr6	43232858	43259989	SLC22A7
HepG2	Sample_01_038	SE_01_03800083	chr5	95192766	95216417	C5orf27
HepG2	Sample_01_038	SE_01_03800084	chr3	150450935	150489423	SIAH2
HepG2	Sample_01_038	SE_01_03800085	chr3	49725021	49729465	RNF123
HepG2	Sample_01_038	SE_01_03800086	chr5	172191608	172235272	DUSP1
HepG2	Sample_01_038	SE_01_03800087	chr8	129552034	129572727	MIR1208
HepG2	Sample_01_038	SE_01_03800088	chr14	95036104	95082615	SERPINA5
HepG2	Sample_01_038	SE_01_03800089	chr3	148316448	148322846	AGTR1
HepG2	Sample_01_038	SE_01_03800090	chr17	55592902	55641279	MSI2
HepG2	Sample_01_038	SE_01_03800091	chr6	138847533	138893999	NHSL1
HepG2	Sample_01_038	SE_01_03800092	chr12	53277851	53322300	KRT8
HepG2	Sample_01_038	SE_01_03800093	chr20	52354534	52419072	SUMO1P1
HepG2	Sample_01_038	SE_01_03800094	chr11	111226240	111241191	POU2AF1
HepG2	Sample_01_038	SE_01_03800095	chr3	186307599	186333769	AHSG
HepG2	Sample_01_038	SE_01_03800096	chr19	15379151	15444189	BRD4
HepG2	Sample_01_038	SE_01_03800097	chr20	17830232	17869170	SNORD17
HepG2	Sample_01_038	SE_01_03800098	chr19	39138332	39198569	ACTN4
HepG2	Sample_01_038	SE_01_03800099	chr11	65183993	65193200	NEAT1
HepG2	Sample_01_038	SE_01_03800100	chr2	62791566	62807344	TMEM17
HepG2	Sample_01_038	SE_01_03800101	chr6	7129859	7171661	RREB1
HepG2	Sample_01_038	SE_01_03800102	chr16	87874662	87905414	SLC7A5
HepG2	Sample_01_038	SE_01_03800103	chr8	128218027	128236192	POU5F1B
HepG2	Sample_01_038	SE_01_03800104	chr6	47029025	47075569	GPR110
HepG2	Sample_01_038	SE_01_03800105	chr6	64270144	64286245	PTP4A1
HepG2	Sample_01_038	SE_01_03800106	chr15	67336388	67361143	SMAD3
HepG2	Sample_01_038	SE_01_03800107	chr10	4980458	5008356	AKR1C1
HepG2	Sample_01_038	SE_01_03800108	chr2	166982397	166994210	SCN1A
HepG2	Sample_01_038	SE_01_03800109	chr6	37068755	37079260	PIM1
HepG2	Sample_01_038	SE_01_03800110	chr6	11389605	11400612	NEDD9
HepG2	Sample_01_038	SE_01_03800111	chr2	239193071	239198360	PER2
HepG2	Sample_01_038	SE_01_03800112	chr1	94079126	94088747	LOC100129046
HepG2	Sample_01_038	SE_01_03800113	chr19	13238391	13279387	STX10
HepG2	Sample_01_038	SE_01_03800114	chr16	50534943	50586743	NKD1
HepG2	Sample_01_038	SE_01_03800115	chr18	67989912	68005454	SOCS6
HepG2	Sample_01_038	SE_01_03800116	chr6	128818976	128842605	PTPRK
HepG2	Sample_01_038	SE_01_03800117	chr9	104074912	104090751	BAAT
HepG2	Sample_01_038	SE_01_03800118	chr8	97598048	97613217	PGCP
HepG2	Sample_01_038	SE_01_03800119	chr6	155717325	155735722	NOX3
HepG2	Sample_01_038	SE_01_03800120	chr11	67864193	67915342	CHKA
HepG2	Sample_01_038	SE_01_03800121	chr20	379069	385398	RBCK1
HepG2	Sample_01_038	SE_01_03800122	chr12	125384122	125425852	UBC
HepG2	Sample_01_038	SE_01_03800123	chr3	171756768	171822946	FNDC3B
HepG2	Sample_01_038	SE_01_03800124	chr3	32856738	32899214	TRIM71
HepG2	Sample_01_038	SE_01_03800125	chr20	31593291	31599073	BPIL1
HepG2	Sample_01_038	SE_01_03800126	chr2	70311939	70316947	PCBP1
HepG2	Sample_01_038	SE_01_03800127	chr10	77783235	77812811	C10orf11
HepG2	Sample_01_038	SE_01_03800128	chr1	169534612	169556648	F5
HepG2	Sample_01_038	SE_01_03800129	chr7	92306788	92328460	FAM133B
HepG2	Sample_01_038	SE_01_03800130	chr3	148931475	148966633	CP
HepG2	Sample_01_038	SE_01_03800131	chr17	77960164	77968943	TBC1D16
HepG2	Sample_01_038	SE_01_03800132	chr16	46896625	46933921	GPT2
HepG2	Sample_01_038	SE_01_03800133	chr9	99139646	99199870	ZNF367
HepG2	Sample_01_038	SE_01_03800134	chr2	113974065	113978521	LOC654433
HepG2	Sample_01_038	SE_01_03800135	chr2	101722245	101745193	TBC1D8
HepG2	Sample_01_038	SE_01_03800136	chr6	32935020	32941575	BRD2
HepG2	Sample_01_038	SE_01_03800137	chr10	102100200	102135287	SCD
HepG2	Sample_01_038	SE_01_03800138	chr2	27384983	27414529	TCF23
HepG2	Sample_01_038	SE_01_03800139	chr2	102640545	102687572	IL1R2
HepG2	Sample_01_038	SE_01_03800140	chr17	57860255	57881325	MIR21
HepG2	Sample_01_038	SE_01_03800141	chr17	55910193	55985075	MRPS23
HepG2	Sample_01_038	SE_01_03800142	chr7	5458572	5479977	TNRC18
HepG2	Sample_01_038	SE_01_03800143	chr2	243010778	243030862	LOC728323
HepG2	Sample_01_038	SE_01_03800144	chr15	89654993	89694293	ABHD2
HepG2	Sample_01_038	SE_01_03800145	chr11	68064158	68099414	LRP5
HepG2	Sample_01_038	SE_01_03800146	chr2	235884637	235915659	SH3BP4
HepG2	Sample_01_038	SE_01_03800147	chr11	61738298	61750161	FTH1
HepG2	Sample_01_038	SE_01_03800148	chr12	103277178	103315148	PAH
HepG2	Sample_01_038	SE_01_03800149	chr20	48920464	48938706	LOC284751
HepG2	Sample_01_038	SE_01_03800150	chr22	36724684	36767689	MYH9
HepG2	Sample_01_038	SE_01_03800151	chr22	24944492	24976167	SNRPD3
HepG2	Sample_01_038	SE_01_03800152	chr6	129958517	130031721	ARHGAP18
HepG2	Sample_01_038	SE_01_03800153	chr1	182248888	182279390	GLUL
HepG2	Sample_01_038	SE_01_03800154	chr11	13135755	13164737	RASSF10
HepG2	Sample_01_038	SE_01_03800155	chr1	20800882	20813977	CAMK2N1
HepG2	Sample_01_038	SE_01_03800156	chr4	38129183	38142668	PTTG2
HepG2	Sample_01_038	SE_01_03800157	chr16	71597979	71629266	TAT
HepG2	Sample_01_038	SE_01_03800158	chr12	46758730	46785353	SLC38A2
HepG2	Sample_01_038	SE_01_03800159	chr20	52194788	52214352	ZNF217
HepG2	Sample_01_038	SE_01_03800160	chr2	42396499	42426535	EML4
HepG2	Sample_01_038	SE_01_03800161	chr3	58024975	58054227	FLNB
HepG2	Sample_01_038	SE_01_03800162	chr20	48520937	48566078	RNF114
HepG2	Sample_01_038	SE_01_03800163	chr1	155096838	155108973	EFNA1
HepG2	Sample_01_038	SE_01_03800164	chr1	55325583	55355277	DHCR24
HepG2	Sample_01_038	SE_01_03800165	chr2	216543734	216578049	LOC646324
HepG2	Sample_01_038	SE_01_03800166	chr17	16188746	16218503	MIR1288
HepG2	Sample_01_038	SE_01_03800167	chr2	233720605	233742607	C2orf82
HepG2	Sample_01_038	SE_01_03800168	chr2	138685310	138704059	HNMT
HepG2	Sample_01_038	SE_01_03800169	chr11	1989090	2013461	LOC100133545
HepG2	Sample_01_038	SE_01_03800170	chr17	43225915	43251135	HEXIM2
HepG2	Sample_01_038	SE_01_03800171	chr7	996675	1032933	COX19
HepG2	Sample_01_038	SE_01_03800172	chr2	201166946	201189207	SPATS2L
HepG2	Sample_01_038	SE_01_03800173	chr16	81478789	81499634	CMIP
HepG2	Sample_01_038	SE_01_03800174	chr10	54513841	54537873	MBL2
HepG2	Sample_01_038	SE_01_03800175	chr19	57466023	57492374	MIMT1
HepG2	Sample_01_038	SE_01_03800176	chr21	44881705	44899639	C21orf84
HepG2	Sample_01_038	SE_01_03800177	chr18	3013500	3063555	LPIN2
HepG2	Sample_01_038	SE_01_03800178	chr1	26675705	26686132	AIM1L
HepG2	Sample_01_038	SE_01_03800179	chr2	46524423	46554376	EPAS1
HepG2	Sample_01_038	SE_01_03800180	chr6	1251410	1270260	FOXQ1
HepG2	Sample_01_038	SE_01_03800181	chr11	9587012	9598709	WEE1
HepG2	Sample_01_038	SE_01_03800182	chr6	157933831	157961900	MIR3692
HepG2	Sample_01_038	SE_01_03800183	chr1	24328190	24354756	SRSF10
HepG2	Sample_01_038	SE_01_03800184	chr12	9264691	9290112	A2M
HepG2	Sample_01_038	SE_01_03800185	chr16	75022507	75036927	ZNRF1
HepG2	Sample_01_038	SE_01_03800186	chr17	72413305	72440562	GPRC5C
HepG2	Sample_01_038	SE_01_03800187	chr15	45103884	45129275	TRIM69
HepG2	Sample_01_038	SE_01_03800188	chr9	116837872	116845460	AMBP
HepG2	Sample_01_038	SE_01_03800189	chr2	231897863	231918403	C2orf72
HepG2	Sample_01_038	SE_01_03800190	chr12	6388322	6407297	PLEKHG6
HepG2	Sample_01_038	SE_01_03800191	chrX	133106670	133161063	GPC3
HepG2	Sample_01_038	SE_01_03800192	chr2	171566432	171575500	LOC440925
HepG2	Sample_01_038	SE_01_03800193	chr12	89737853	89750496	DUSP6
HepG2	Sample_01_038	SE_01_03800194	chr16	5082544	5087492	NAGPA
HepG2	Sample_01_038	SE_01_03800195	chr16	12703644	12711538	CPPED1
HepG2	Sample_01_038	SE_01_03800196	chr17	75445567	75462165	2023-09-09
HepG2	Sample_01_038	SE_01_03800197	chr5	172278404	172297289	ERGIC1
HepG2	Sample_01_038	SE_01_03800198	chr12	115092994	115123258	TBX3
HepG2	Sample_01_038	SE_01_03800199	chr16	20605976	20612290	ACSM2B
HepG2	Sample_01_038	SE_01_03800200	chr2	208646633	208696562	FZD5
HepG2	Sample_01_038	SE_01_03800201	chr8	340746	355629	FBXO25
HepG2	Sample_01_038	SE_01_03800202	chr2	8817414	8825708	ID2
HepG2	Sample_01_038	SE_01_03800203	chr9	6895833	6906782	KDM4C
HepG2	Sample_01_038	SE_01_03800204	chr8	22209945	22228909	SLC39A14
HepG2	Sample_01_038	SE_01_03800205	chr2	75782569	75805316	FAM176A
HepG2	Sample_01_038	SE_01_03800206	chrX	30644063	30676062	GK
HepG2	Sample_01_038	SE_01_03800207	chr12	4107133	4136653	PARP11
HepG2	Sample_01_038	SE_01_03800208	chr20	22487165	22515976	NCRNA00261
HepG2	Sample_01_038	SE_01_03800209	chr6	7540634	7562815	DSP
HepG2	Sample_01_038	SE_01_03800210	chr1	229264484	229269484	RAB4A
HepG2	Sample_01_038	SE_01_03800211	chr2	21263004	21294665	APOB
HepG2	Sample_01_038	SE_01_03800212	chr20	61544267	61560684	DIDO1
HepG2	Sample_01_038	SE_01_03800213	chr3	124548750	124559124	ITGB5
HepG2	Sample_01_038	SE_01_03800214	chr7	55244631	55257945	EGFR
HepG2	Sample_01_038	SE_01_03800215	chr6	36633946	36648157	CDKN1A
HepG2	Sample_01_038	SE_01_03800216	chr12	26880461	26903250	ITPR2
HepG2	Sample_01_038	SE_01_03800217	chr11	2746790	2754978	KCNQ1OT1
HepG2	Sample_01_038	SE_01_03800218	chr6	167679268	167706850	UNC93A
HepG2	Sample_01_038	SE_01_03800219	chr22	29197526	29226381	XBP1
HepG2	Sample_01_038	SE_01_03800220	chr6	142600898	142629070	GPR126
HepG2	Sample_01_038	SE_01_03800221	chr9	111630501	111662501	ACTL7A
HepG2	Sample_01_038	SE_01_03800222	chr2	178105970	178131884	MIR3128
HepG2	Sample_01_038	SE_01_03800223	chr6	138043111	138056573	TNFAIP3
HepG2	Sample_01_038	SE_01_03800224	chr9	673225	687574	KANK1
HepG2	Sample_01_038	SE_01_03800225	chr7	47801170	47827807	C7orf69
HepG2	Sample_01_038	SE_01_03800226	chr19	11199108	11207325	LDLR
HepG2	Sample_01_038	SE_01_03800227	chr17	72744694	72770451	SLC9A3R1
HepG2	Sample_01_038	SE_01_03800228	chr19	2529394	2599813	GADD45B
HepG2	Sample_01_038	SE_01_03800229	chr10	44730594	44755846	CXCL12
HepG2	Sample_01_038	SE_01_03800230	chr2	146509724	146521073	PABPC1P2
HepG2	Sample_01_038	SE_01_03800231	chr14	69245669	69263109	ZFP36L1
HepG2	Sample_01_038	SE_01_03800232	chr3	50232185	50265776	SLC38A3
HepG2	Sample_01_038	SE_01_03800233	chr11	95744152	95751071	MTMR2
HepG2	Sample_01_038	SE_01_03800234	chr16	73070980	73105315	ZFHX3
HepG2	Sample_01_038	SE_01_03800235	chr19	54366433	54371020	MYADM
HepG2	Sample_01_038	SE_01_03800236	chr14	34492070	34514391	EGLN3
HepG2	Sample_01_038	SE_01_03800237	chr18	3232574	3266581	MYL12A
HepG2	Sample_01_038	SE_01_03800238	chr6	37093522	37116681	PIM1
HepG2	Sample_01_038	SE_01_03800239	chr3	53875161	53881624	CHDH
HepG2	Sample_01_038	SE_01_03800240	chr9	124043418	124063325	GSN
HepG2	Sample_01_038	SE_01_03800241	chr20	45294178	45306370	SLC13A3
HepG2	Sample_01_038	SE_01_03800242	chr17	73864611	73888660	TRIM47
HepG2	Sample_01_038	SE_01_03800243	chr5	148530642	148555015	ABLIM3
HepG2	Sample_01_038	SE_01_03800244	chr2	165548964	165573713	SNORA70F
HepG2	Sample_01_038	SE_01_03800245	chr16	20434522	20440297	ACSM5
HepG2	Sample_01_038	SE_01_03800246	chr16	75276829	75300558	BCAR1
HepG2	Sample_01_038	SE_01_03800247	chr15	93344732	93376230	ASB9P1
HepG2	Sample_01_038	SE_01_03800248	chr12	46864717	46889056	SLC38A2
HepG2	Sample_01_038	SE_01_03800249	chr10	29598828	29617483	LYZL1
HepG2	Sample_01_038	SE_01_03800250	chr7	100764484	100772372	SERPINE1
HepG2	Sample_01_038	SE_01_03800251	chr6	24312682	24356157	KAAG1
HepG2	Sample_01_038	SE_01_03800252	chr15	45360671	45369224	DUOX2
HepG2	Sample_01_038	SE_01_03800253	chr15	40361382	40401109	BMF
HepG2	Sample_01_038	SE_01_03800254	chr17	36855044	36861753	MLLT6
HepG2	Sample_01_038	SE_01_03800255	chr16	72947796	72971589	ZFHX3
HepG2	Sample_01_038	SE_01_03800256	chr7	130568950	130611358	LOC646329
HepG2	Sample_01_038	SE_01_03800257	chr14	62018681	62030900	HIF1A
HepG2	Sample_01_038	SE_01_03800258	chr17	38253603	38271522	NR1D1
HepG2	Sample_01_038	SE_01_03800259	chr7	156400662	156410796	C7orf13
HepG2	Sample_01_038	SE_01_03800260	chr10	29226484	29239265	BAMBI
HepG2	Sample_01_038	SE_01_03800261	chr17	70561992	70588985	LOC100499467
HepG2	Sample_01_038	SE_01_03800262	chr8	8144563	8178108	FLJ10661
HepG2	Sample_01_038	SE_01_03800263	chrX	152876236	152894793	FAM58A
HepG2	Sample_01_038	SE_01_03800264	chr19	47597654	47618093	ZC3H4
HepG2	Sample_01_038	SE_01_03800265	chr3	186755978	186762860	ST6GAL1
HepG2	Sample_01_038	SE_01_03800266	chr6	132297115	132305061	CTGF
HepG2	Sample_01_038	SE_01_03800267	chr16	89881952	89905614	SPIRE2
HepG2	Sample_01_038	SE_01_03800268	chr1	8229177	8273894	SLC45A1
HepG2	Sample_01_038	SE_01_03800269	chr14	31673845	31678798	HECTD1
HepG2	Sample_01_038	SE_01_03800270	chr2	43405123	43451423	ZFP36L2
HepG2	Sample_01_038	SE_01_03800271	chr11	74862118	74881748	SLCO2B1
HepG2	Sample_01_038	SE_01_03800272	chr1	150977826	150987344	PRUNE
HepG2	Sample_01_038	SE_01_03800273	chr6	144064041	144069286	PHACTR2
HepG2	Sample_01_038	SE_01_03800274	chr14	25306711	25311797	GZMB
HepG2	Sample_01_038	SE_01_03800275	chr2	201268051	201273665	SPATS2L
HepG2	Sample_01_038	SE_01_03800276	chr2	235752002	235791025	SH3BP4
HepG2	Sample_01_038	SE_01_03800277	chr2	128143498	128179719	PROC
HepG2	Sample_01_038	SE_01_03800278	chr2	216273981	216307412	FN1
HepG2	Sample_01_038	SE_01_03800279	chrX	128249849	128282580	SMARCA1
HepG2	Sample_01_038	SE_01_03800280	chr17	36768585	36785309	SRCIN1
HepG2	Sample_01_038	SE_01_03800281	chr21	44842379	44865416	SIK1
HepG2	Sample_01_038	SE_01_03800282	chr18	46452285	46479326	SMAD7
HepG2	Sample_01_038	SE_01_03800283	chr3	187700974	187723037	LPP
HepG2	Sample_01_038	SE_01_03800284	chr9	38008281	38069241	SHB
HepG2	Sample_01_038	SE_01_03800285	chr11	102319201	102348895	TMEM123
HepG2	Sample_01_038	SE_01_03800286	chr1	156073391	156100464	LMNA
HepG2	Sample_01_038	SE_01_03800287	chr3	8688148	8705977	C3orf32
HepG2	Sample_01_038	SE_01_03800288	chr8	124386239	124427360	ATAD2
HepG2	Sample_01_038	SE_01_03800289	chr19	39888206	39902932	ZFP36
HepG2	Sample_01_038	SE_01_03800290	chr8	141057321	141077335	KCNK9
HepG2	Sample_01_038	SE_01_03800291	chr3	194875264	194889605	C3orf21
HepG2	Sample_01_038	SE_01_03800292	chr6	114485350	114493397	HS3ST5
HepG2	Sample_01_038	SE_01_03800293	chr11	34661276	34690086	EHF
HepG2	Sample_01_038	SE_01_03800294	chr10	114018281	114064640	TECTB
HepG2	Sample_01_038	SE_01_03800295	chr18	9091935	9107183	NDUFV2
HepG2	Sample_01_038	SE_01_03800296	chr10	15374568	15396298	FAM171A1
HepG2	Sample_01_038	SE_01_03800297	chr8	129179042	129211185	MIR1208
HepG2	Sample_01_038	SE_01_03800298	chr1	230837001	230865784	AGT
HepG2	Sample_01_038	SE_01_03800299	chr1	161186223	161195656	APOA2
HepG2	Sample_01_038	SE_01_03800300	chr10	63842107	63859194	RTKN2
HepG2	Sample_01_038	SE_01_03800301	chr7	104651024	104657414	LOC100216545
HepG2	Sample_01_038	SE_01_03800302	chr2	62751442	62769431	TMEM17
HepG2	Sample_01_038	SE_01_03800303	chr16	11400484	11407727	PRM1
HepG2	Sample_01_038	SE_01_03800304	chr10	80723816	80735272	LOC283050
HepG2	Sample_01_038	SE_01_03800305	chr2	110387535	110404158	ANKRD57
HepG2	Sample_01_038	SE_01_03800306	chr2	208709180	208714094	FZD5
HepG2	Sample_01_038	SE_01_03800307	chr11	57528567	57567370	CTNND1
HepG2	Sample_01_038	SE_01_03800308	chr14	94852156	94867631	SERPINA1
HepG2	Sample_01_038	SE_01_03800309	chr5	175270034	175296498	CPLX2
HepG2	Sample_01_038	SE_01_03800310	chr10	80818884	80871937	ZMIZ1
HepG2	Sample_01_038	SE_01_03800311	chr2	216476275	216490538	FN1
HepG2	Sample_01_038	SE_01_03800312	chr3	99782296	99817981	FILIP1L
HepG2	Sample_01_038	SE_01_03800313	chr10	63795733	63811289	ARID5B
HepG2	Sample_01_038	SE_01_03800314	chr3	187455755	187469290	BCL6
HepG2	Sample_01_038	SE_01_03800315	chr16	52521673	52533930	TOX3
HepG2	Sample_01_038	SE_01_03800316	chr3	124719712	124730149	HEG1
HepG2	Sample_01_038	SE_01_03800317	chr10	114476154	114512342	MIR4295
HepG2	Sample_01_038	SE_01_03800318	chr1	150575661	150588042	ENSA
HepG2	Sample_01_038	SE_01_03800319	chr16	68291070	68316583	SLC7A6
HepG2	Sample_01_038	SE_01_03800320	chr16	85547946	85572385	KIAA0182
HepG2	Sample_01_038	SE_01_03800321	chr14	55107270	55126134	SAMD4A
HepG2	Sample_01_038	SE_01_03800322	chr9	107635532	107690602	ABCA1
HepG2	Sample_01_038	SE_01_03800323	chr6	11358286	11369896	NEDD9
HepG2	Sample_01_038	SE_01_03800324	chr4	187604405	187650753	FAT1
HepG2	Sample_01_038	SE_01_03800325	chr6	30581921	30586887	PPP1R10
HepG2	Sample_01_038	SE_01_03800326	chr15	79278285	79290675	RASGRF1
HepG2	Sample_01_038	SE_01_03800327	chr1	20250119	20263171	PLA2G2E
HepG2	Sample_01_038	SE_01_03800328	chr2	158984197	158989405	UPP2
HepG2	Sample_01_038	SE_01_03800329	chr11	12821183	12851325	TEAD1
HepG2	Sample_01_038	SE_01_03800330	chr3	78881118	78900030	ROBO1
HepG2	Sample_01_038	SE_01_03800331	chr6	155763408	155770343	NOX3
HepG2	Sample_01_038	SE_01_03800332	chr2	73247242	73272291	SFXN5
HepG2	Sample_01_038	SE_01_03800333	chr14	35449412	35453494	SRP54
HepG2	Sample_01_038	SE_01_03800334	chr1	3236012	3273418	ARHGEF16
HepG2	Sample_01_038	SE_01_03800335	chr7	57404427	57424552	MIR3147
HepG2	Sample_01_038	SE_01_03800336	chr22	45665177	45683576	UPK3A
HepG2	Sample_01_038	SE_01_03800337	chr1	234997998	235013385	NCRNA00184
HepG2	Sample_01_038	SE_01_03800338	chr6	151356174	151391948	AKAP12
HepG2	Sample_01_038	SE_01_03800339	chr10	5188410	5192262	AKR1CL1
HepG2	Sample_01_038	SE_01_03800340	chr2	20724539	20740080	RHOB
HepG2	Sample_01_038	SE_01_03800341	chr3	58153358	58187318	DNASE1L3
HepG2	Sample_01_038	SE_01_03800342	chr10	77492437	77549577	C10orf11
HepG2	Sample_01_038	SE_01_03800343	chr1	27234556	27242756	NR0B2
HepG2	Sample_01_038	SE_01_03800344	chr8	98159665	98184560	TSPYL5
HepG2	Sample_01_038	SE_01_03800345	chr6	26120150	26127343	HIST1H2BC
HepG2	Sample_01_038	SE_01_03800346	chr7	32703546	32711193	DPY19L1P1
HepG2	Sample_01_038	SE_01_03800347	chr10	97210569	97241483	SORBS1
HepG2	Sample_01_038	SE_01_03800348	chr1	23880220	23891179	ID3
HepG2	Sample_01_038	SE_01_03800349	chr2	201979401	201994719	CFLAR
HepG2	Sample_01_038	SE_01_03800350	chr14	100015725	100052320	CCDC85C
HepG2	Sample_01_038	SE_01_03800351	chr16	75338175	75345182	BCAR1
HepG2	Sample_01_038	SE_01_03800352	chr8	13122191	13135009	DLC1
HepG2	Sample_01_038	SE_01_03800353	chr1	8077445	8088878	ERRFI1
HepG2	Sample_01_038	SE_01_03800354	chr22	50328054	50361590	PIM3
HepG2	Sample_01_038	SE_01_03800355	chr19	33516866	33543868	RHPN2
HepG2	Sample_01_038	SE_01_03800356	chr17	17725152	17744901	SREBF1
HepG2	Sample_01_038	SE_01_03800357	chr21	40157074	40181899	ETS2
HepG2	Sample_01_038	SE_01_03800358	chr7	77026112	77046789	PION
HepG2	Sample_01_038	SE_01_03800359	chr2	112248267	112254845	LOC541471
HepG2	Sample_01_038	SE_01_03800360	chr9	132318533	132343330	C9orf50
HepG2	Sample_01_038	SE_01_03800361	chr17	66815398	66821147	ABCA8
HepG2	Sample_01_038	SE_01_03800362	chr14	101280983	101289249	MEG3
HepG2	Sample_01_038	SE_01_03800363	chr14	31492531	31518494	STRN3
HepG2	Sample_01_038	SE_01_03800364	chr2	188391599	188419546	TFPI
HepG2	Sample_01_038	SE_01_03800365	chr4	9997956	10027959	SLC2A9
HepG2	Sample_01_038	SE_01_03800366	chr2	17719053	17739591	VSNL1
HepG2	Sample_01_038	SE_01_03800367	chr19	46367636	46399861	IRF2BP1
HepG2	Sample_01_038	SE_01_03800368	chr17	56011906	56030759	CUEDC1
HepG2	Sample_01_038	SE_01_03800369	chr2	87752777	87759347	NCRNA00152
HepG2	Sample_01_038	SE_01_03800370	chr10	3822203	3827489	KLF6
HepG2	Sample_01_038	SE_01_03800371	chr2	61242716	61247374	PEX13
HepG2	Sample_01_038	SE_01_03800372	chr17	36058422	36078044	HNF1B
HepG2	Sample_01_038	SE_01_03800373	chr14	65692694	65723439	MAX
HepG2	Sample_01_038	SE_01_03800374	chr17	55483114	55493144	MSI2
HepG2	Sample_01_038	SE_01_03800375	chr15	74733528	74739816	SEMA7A
HepG2	Sample_01_038	SE_01_03800376	chr22	37418357	37440596	MPST
HepG2	Sample_01_038	SE_01_03800377	chr20	17941236	17952755	SNX5
HepG2	Sample_01_038	SE_01_03800378	chr6	5057976	5089194	PPP1R3G
HepG2	Sample_01_038	SE_01_03800379	chr12	101992650	102013302	MYBPC1
HepG2	Sample_01_038	SE_01_03800380	chr17	48961307	48993197	TOB1
HepG2	Sample_01_038	SE_01_03800381	chr16	81565972	81602066	CMIP
HepG2	Sample_01_038	SE_01_03800382	chr20	385745	391136	RBCK1
HepG2	Sample_01_038	SE_01_03800383	chr9	97783758	97795950	MIR23B
HepG2	Sample_01_038	SE_01_03800384	chr9	85195050	85221571	RASEF
HepG2	Sample_01_038	SE_01_03800385	chr1	146686072	146712161	FMO5
HepG2	Sample_01_038	SE_01_03800386	chr3	171836829	171860878	FNDC3B
HepG2	Sample_01_038	SE_01_03800387	chr2	110432183	110449804	ANKRD57
HepG2	Sample_01_038	SE_01_03800388	chr1	88638144	88643975	PKN2
HepG2	Sample_01_038	SE_01_03800389	chr2	228677415	228686456	CCL20
HepG2	Sample_01_038	SE_01_03800390	chr16	57925701	57930217	CNGB1
HepG2	Sample_01_038	SE_01_03800391	chr3	37934270	37952849	CTDSPL
HepG2	Sample_01_038	SE_01_03800392	chr1	8175496	8183070	ERRFI1
HepG2	Sample_01_038	SE_01_03800393	chr14	38055105	38066675	FOXA1
HepG2	Sample_01_038	SE_01_03800394	chr1	154942704	154949056	SHC1
HepG2	Sample_01_038	SE_01_03800395	chr7	22472914	22485738	MGC87042
HepG2	Sample_01_038	SE_01_03800396	chr19	6719083	6730652	C3
HepG2	Sample_01_038	SE_01_03800397	chr9	74356386	74383834	TMEM2
HepG2	Sample_01_038	SE_01_03800398	chr6	52435606	52464302	TRAM2
HepG2	Sample_01_038	SE_01_03800399	chr17	14262570	14279746	MGC12916
HepG2	Sample_01_038	SE_01_03800400	chr1	12668794	12680113	DHRS3
HepG2	Sample_01_038	SE_01_03800401	chr7	94326230	94332646	PEG10
HepG2	Sample_01_038	SE_01_03800402	chr16	87413052	87423529	FBXO31
HepG2	Sample_01_038	SE_01_03800403	chr6	1226754	1232629	FOXQ1
HepG2	Sample_01_038	SE_01_03800404	chr5	52285142	52302161	ITGA2
HepG2	Sample_01_038	SE_01_03800405	chr19	18473682	18494544	GDF15
HepG2	Sample_01_038	SE_01_03800406	chr19	5953750	5980705	RANBP3
HepG2	Sample_01_038	SE_01_03800407	chr6	168161426	168166428	C6orf123
HepG2	Sample_01_038	SE_01_03800408	chr20	10632416	10656312	JAG1
HepG2	Sample_01_038	SE_01_03800409	chr2	153327204	153347982	FMNL2
HepG2	Sample_01_038	SE_01_03800410	chr9	130708061	130749907	FAM102A
HepG2	Sample_01_038	SE_01_03800411	chr2	191672359	191678294	GLS
HepG2	Sample_01_038	SE_01_03800412	chr6	143379937	143387037	AIG1
HepG2	Sample_01_038	SE_01_03800413	chr1	234883624	234908978	NCRNA00184
HepG2	Sample_01_038	SE_01_03800414	chr7	7213114	7225461	C1GALT1
HepG2	Sample_01_038	SE_01_03800415	chr8	126421581	126447738	TRIB1
HepG2	Sample_01_038	SE_01_03800416	chr5	52759931	52787348	FST
HepG2	Sample_01_038	SE_01_03800417	chr1	150533336	150552906	MCL1
HepG2	Sample_01_038	SE_01_03800418	chr6	119660966	119672403	MAN1A1
HepG2	Sample_01_038	SE_01_03800419	chr11	124803966	124814387	HEPACAM
HepG2	Sample_01_038	SE_01_03800420	chr9	124498889	124528533	DAB2IP
HepG2	Sample_01_038	SE_01_03800421	chr17	63538971	63561854	AXIN2
HepG2	Sample_01_038	SE_01_03800422	chr22	29307015	29329120	ZNRF3
HepG2	Sample_01_038	SE_01_03800423	chr3	120396651	120413286	HGD
HepG2	Sample_01_038	SE_01_03800424	chr21	46285528	46302183	PTTG1IP
HepG2	Sample_01_038	SE_01_03800425	chr3	50296985	50309753	SEMA3B
HepG2	Sample_01_038	SE_01_03800426	chr19	1243476	1266498	MIDN
HepG2	Sample_01_038	SE_01_03800427	chr2	216690752	216700259	LOC646324
HepG2	Sample_01_038	SE_01_03800428	chr2	102346594	102389942	MAP4K4
HepG2	Sample_01_038	SE_01_03800429	chr14	25284716	25288678	GZMB
HepG2	Sample_01_038	SE_01_03800430	chr1	228961586	228975742	RHOU
HepG2	Sample_01_038	SE_01_03800431	chr20	32579627	32598226	RALY
HepG2	Sample_01_038	SE_01_03800432	chr15	53743818	53748941	WDR72
HepG2	Sample_01_038	SE_01_03800433	chr12	69722999	69744473	LYZ
HepG2	Sample_01_038	SE_01_03800434	chr15	93442832	93461417	MIR3175
HepG2	Sample_01_038	SE_01_03800435	chr1	36838029	36867545	STK40
HepG2	Sample_01_038	SE_01_03800436	chr3	124407656	124421325	UMPS
HepG2	Sample_01_038	SE_01_03800437	chr6	31619178	31627408	APOM
HepG2	Sample_01_038	SE_01_03800438	chr12	53374805	53402262	EIF4B
HepG2	Sample_01_038	SE_01_03800439	chr2	120181871	120196563	TMEM37
HepG2	Sample_01_038	SE_01_03800440	chr7	1194908	1215906	ZFAND2A
HepG2	Sample_01_038	SE_01_03800441	chr2	219251702	219272275	CTDSP1
HepG2	Sample_01_038	SE_01_03800442	chr6	138114110	138133222	TNFAIP3
HepG2	Sample_01_038	SE_01_03800443	chr4	23857852	23893134	PPARGC1A
HepG2	Sample_01_038	SE_01_03800444	chr17	40713446	40720230	MLX
HepG2	Sample_01_038	SE_01_03800445	chr5	131330162	131339656	ACSL6
HepG2	Sample_01_038	SE_01_03800446	chr12	79940037	79961656	PAWR
HepG2	Sample_01_038	SE_01_03800447	chr6	1310282	1336656	FOXQ1
HepG2	Sample_01_038	SE_01_03800448	chr20	33290713	33306241	TP53INP2
HepG2	Sample_01_038	SE_01_03800449	chr12	24903282	24914858	BCAT1
HepG2	Sample_01_038	SE_01_03800450	chr14	54409229	54425011	BMP4
HepG2	Sample_01_038	SE_01_03800451	chr8	12950477	12956163	DLC1
HepG2	Sample_01_038	SE_01_03800452	chr10	82023368	82051715	MAT1A
HepG2	Sample_01_038	SE_01_03800453	chr6	25899333	25931831	SLC17A2
HepG2	Sample_01_038	SE_01_03800454	chr20	22383990	22412152	LOC284788
HepG2	Sample_01_038	SE_01_03800455	chr1	16158052	16177228	SPEN
HepG2	Sample_01_038	SE_01_03800456	chr5	132172453	132177161	SHROOM1
HepG2	Sample_01_038	SE_01_03800457	chr22	31605787	31627664	LIMK2
HepG2	Sample_01_038	SE_01_03800458	chr9	104112060	104129382	BAAT
HepG2	Sample_01_038	SE_01_03800459	chr12	6443668	6451903	TNFRSF1A
HepG2	Sample_01_038	SE_01_03800460	chr19	18615503	18632914	ELL
HepG2	Sample_01_038	SE_01_03800461	chr2	118841505	118849414	INSIG2
HepG2	Sample_01_038	SE_01_03800462	chr3	9937749	9951571	IL17RE
HepG2	Sample_01_038	SE_01_03800463	chr1	44007210	44015396	PTPRF
HepG2	Sample_01_038	SE_01_03800464	chr2	8748495	8774955	ID2
HepG2	Sample_01_038	SE_01_03800465	chrX	46177898	46188402	ZNF673
HepG2	Sample_01_038	SE_01_03800466	chr4	3820438	3840601	ADRA2C
HepG2	Sample_01_038	SE_01_03800467	chr17	19549973	19576199	ALDH3A2
HepG2	Sample_01_038	SE_01_03800468	chr2	63418427	63422774	DBIL5P2
HepG2	Sample_01_038	SE_01_03800469	chr1	48376968	48385504	LOC388630
HepG2	Sample_01_038	SE_01_03800470	chr5	135387195	135403203	VTRNA2
HepG2	Sample_01_038	SE_01_03800471	chr10	33482593	33488262	NRP1
HepG2	Sample_01_038	SE_01_03800472	chr7	99594282	99615662	ZKSCAN1
HepG2	Sample_01_038	SE_01_03800473	chr2	225009300	225016294	SERPINE2
HepG2	Sample_01_038	SE_01_03800474	chr6	113952095	113967064	MARCKS
HepG2	Sample_01_038	SE_01_03800475	chr19	14623848	14633890	DNAJB1
HepG2	Sample_01_038	SE_01_03800476	chr7	43676197	43700536	STK17A
HepG2	Sample_01_038	SE_01_03800477	chr12	121415092	121422852	HNF1A
HepG2	Sample_01_038	SE_01_03800478	chr8	103800647	103823712	AZIN1
HepG2	Sample_01_038	SE_01_03800479	chr4	39515321	39531488	UGDH
HepG2	Sample_01_038	SE_01_03800480	chr3	170715044	170746789	SLC2A2
HepG2	Sample_01_038	SE_01_03800481	chr20	48277824	48308967	B4GALT5
HepG2	Sample_01_038	SE_01_03800482	chr20	30147973	30162473	PSIMCT-1
HepG2	Sample_01_038	SE_01_03800483	chr9	99248597	99256654	HABP4
HepG2	Sample_01_038	SE_01_03800484	chr19	49464636	49468352	FTL
HepG2	Sample_01_038	SE_01_03800485	chr2	223659471	223682878	ACSL3
HepG2	Sample_01_038	SE_01_03800486	chr5	42843460	42878891	SEPP1
HepG2	Sample_01_038	SE_01_03800487	chr14	39566335	39574122	SEC23A
HepG2	Sample_01_038	SE_01_03800488	chr12	6640196	6652778	GAPDH
HepG2	Sample_01_038	SE_01_03800489	chr22	21124805	21147002	SERPIND1
HepG2	Sample_01_038	SE_01_03800490	chr17	36812788	36817169	C17orf96
HepG2	Sample_01_038	SE_01_03800491	chr1	27316934	27323307	TRNP1
HepG2	Sample_01_038	SE_01_03800492	chr16	14489550	14500762	MIR365-1
HepG2	Sample_01_038	SE_01_03800493	chr15	101974917	101995015	PCSK6
HepG2	Sample_01_038	SE_01_03800494	chr16	88265701	88279363	ZNF469
HepG2	Sample_01_038	SE_01_03800495	chr3	27399534	27419027	NEK10
HepG2	Sample_01_038	SE_01_03800496	chr20	47795526	47804931	STAU1
HepG2	Sample_01_038	SE_01_03800497	chr3	193819015	193860355	HES1
HepG2	Sample_01_038	SE_01_03800498	chr1	4324777	4332195	LOC284661
HepG2	Sample_01_038	SE_01_03800499	chr10	73092511	73108748	SLC29A3
HepG2	Sample_01_038	SE_01_03800500	chr1	16469738	16492244	EPHA2
HepG2	Sample_01_038	SE_01_03800501	chr7	37979317	37985330	EPDR1
HepG2	Sample_01_038	SE_01_03800502	chr12	110473412	110486846	C12orf76
HepG2	Sample_01_038	SE_01_03800503	chr1	156715414	156721526	HDGF
HepG2	Sample_01_038	SE_01_03800504	chr15	102066228	102079037	PCSK6
HepG2	Sample_01_038	SE_01_03800505	chr17	62151306	62162518	ERN1
Huh7	Sample_02_285	SE_02_28500001	chr19	33761461	33797732	CEBPA
Huh7	Sample_02_285	SE_02_28500002	chr18	56065700	56124043	MIR122
Huh7	Sample_02_285	SE_02_28500003	chr22	29168005	29226723	XBP1
Huh7	Sample_02_285	SE_02_28500004	chr1	214148677	214226762	PROX1
Huh7	Sample_02_285	SE_02_28500005	chr1	235089365	235126101	SNORA14B
Huh7	Sample_02_285	SE_02_28500006	chr11	1673620	1716639	FAM99A
Huh7	Sample_02_285	SE_02_28500007	chr17	53471304	53534348	MMD
Huh7	Sample_02_285	SE_02_28500008	chr2	15869668	15926619	DDX1
Huh7	Sample_02_285	SE_02_28500009	chr15	67333001	67376548	SMAD3
Huh7	Sample_02_285	SE_02_28500010	chr2	43150659	43216336	HAAO
Huh7	Sample_02_285	SE_02_28500011	chr19	33862388	33898534	CEBPG
Huh7	Sample_02_285	SE_02_28500012	chr14	31674707	31679073	HECTD1
Huh7	Sample_02_285	SE_02_28500013	chrX	133113862	133161195	GPC3
Huh7	Sample_02_285	SE_02_28500014	chr20	30281693	30312297	BCL2L1
Huh7	Sample_02_285	SE_02_28500015	chr3	10530236	10559881	ATP2B2
Huh7	Sample_02_285	SE_02_28500016	chr4	74240343	74319761	ALB
Huh7	Sample_02_285	SE_02_28500017	chr16	85545161	85572803	KIAA0182
Huh7	Sample_02_285	SE_02_28500018	chr20	326778	364186	TRIB3
Huh7	Sample_02_285	SE_02_28500019	chr7	5456981	5471328	TNRC18
Huh7	Sample_02_285	SE_02_28500020	chr11	61732749	61771359	FTH1
Huh7	Sample_02_285	SE_02_28500021	chr7	130568417	130628830	LOC646329
Huh7	Sample_02_285	SE_02_28500022	chr15	91399752	91429781	FURIN
Huh7	Sample_02_285	SE_02_28500023	chr20	45980319	45990798	ZMYND8
Huh7	Sample_02_285	SE_02_28500024	chr19	33514579	33556844	RHPN2
Huh7	Sample_02_285	SE_02_28500025	chr10	99056630	99095610	FRAT1
Huh7	Sample_02_285	SE_02_28500026	chr22	37412590	37443489	MPST
Huh7	Sample_02_285	SE_02_28500027	chr1	234733832	234761035	IRF2BP2
Huh7	Sample_02_285	SE_02_28500028	chr22	24889229	24918602	UPB1
Huh7	Sample_02_285	SE_02_28500029	chr14	32544330	32554953	ARHGAP5
Huh7	Sample_02_285	SE_02_28500030	chr11	1987651	2016048	LOC100133545
Huh7	Sample_02_285	SE_02_28500031	chr5	90160839	90247182	GPR98
Huh7	Sample_02_285	SE_02_28500032	chr9	132240701	132261114	C9orf50
Huh7	Sample_02_285	SE_02_28500033	chr21	44879014	44943458	C21orf84
Huh7	Sample_02_285	SE_02_28500034	chr5	34482458	34513777	RAI14
Huh7	Sample_02_285	SE_02_28500035	chr11	67052692	67072801	ANKRD13D
Huh7	Sample_02_285	SE_02_28500036	chr15	89660354	89712398	ABHD2
Huh7	Sample_02_285	SE_02_28500037	chr2	20381885	20426375	SDC1
Huh7	Sample_02_285	SE_02_28500038	chr20	22487198	22508487	NCRNA00261
Huh7	Sample_02_285	SE_02_28500039	chr12	103276498	103318154	PAH
Huh7	Sample_02_285	SE_02_28500040	chr14	32428984	32440125	C14orf128
Huh7	Sample_02_285	SE_02_28500041	chr20	22542238	22568289	NCRNA00261
Huh7	Sample_02_285	SE_02_28500042	chr10	34404777	34427797	PARD3
Huh7	Sample_02_285	SE_02_28500043	chr19	1239544	1267505	MIDN
Huh7	Sample_02_285	SE_02_28500044	chr14	23434394	23453110	JUB
Huh7	Sample_02_285	SE_02_28500045	chr8	121819041	121859951	SNTB1
Huh7	Sample_02_285	SE_02_28500046	chr20	30180847	30201585	ID1
Huh7	Sample_02_285	SE_02_28500047	chr20	17834655	17860226	SNORD17
Huh7	Sample_02_285	SE_02_28500048	chr20	52351821	52419874	SUMO1P1
Huh7	Sample_02_285	SE_02_28500049	chr11	66881525	66889299	KDM2A
Huh7	Sample_02_285	SE_02_28500050	chr17	47071852	47093172	IGF2BP1
Huh7	Sample_02_285	SE_02_28500051	chr3	171841651	171874774	FNDC3B
Huh7	Sample_02_285	SE_02_28500052	chr1	236652792	236688684	LGALS8
Huh7	Sample_02_285	SE_02_28500053	chr10	34449345	34478734	PARD3
Huh7	Sample_02_285	SE_02_28500054	chr11	68063621	68101017	LRP5
Huh7	Sample_02_285	SE_02_28500055	chr11	57262521	57284021	SLC43A1
Huh7	Sample_02_285	SE_02_28500056	chr20	22382837	22413845	LOC284788
Huh7	Sample_02_285	SE_02_28500057	chr19	950272	964418	WDR18
Huh7	Sample_02_285	SE_02_28500058	chr9	116836831	116863084	AMBP
Huh7	Sample_02_285	SE_02_28500059	chr1	17074188	17098651	MST1P9
Huh7	Sample_02_285	SE_02_28500060	chr20	52195011	52217113	ZNF217
Huh7	Sample_02_285	SE_02_28500061	chr19	39887643	39905411	ZFP36
Huh7	Sample_02_285	SE_02_28500062	chr10	82244678	82267439	SH2D4B
Huh7	Sample_02_285	SE_02_28500063	chr22	29661360	29673391	EWSR1
Huh7	Sample_02_285	SE_02_28500064	chr15	96863893	96886680	NR2F2
Huh7	Sample_02_285	SE_02_28500065	chr17	57904775	57935445	MIR21
Huh7	Sample_02_285	SE_02_28500066	chr15	93344380	93377261	ASB9P1
Huh7	Sample_02_285	SE_02_28500067	chr6	158427883	158464496	SYNJ2
Huh7	Sample_02_285	SE_02_28500068	chr22	37939752	37967157	CDC42EP1
Huh7	Sample_02_285	SE_02_28500069	chr11	69500405	69525734	FGF19
Huh7	Sample_02_285	SE_02_28500070	chr20	43016949	43045190	HNF4A
Huh7	Sample_02_285	SE_02_28500071	chr1	9292749	9312317	H6PD
Huh7	Sample_02_285	SE_02_28500072	chr19	46365233	46387452	FOXA3
Huh7	Sample_02_285	SE_02_28500073	chr11	118779213	118801334	BCL9L
Huh7	Sample_02_285	SE_02_28500074	chr5	179230434	179253453	SQSTM1
Huh7	Sample_02_285	SE_02_28500075	chr20	6666925	6693410	BMP2
Huh7	Sample_02_285	SE_02_28500076	chr1	234946141	234956315	NCRNA00184
Huh7	Sample_02_285	SE_02_28500077	chr1	154971311	154991846	ZBTB7B
Huh7	Sample_02_285	SE_02_28500078	chr12	89709953	89752298	DUSP6
Huh7	Sample_02_285	SE_02_28500079	chr19	56647351	56656814	ZNF444
Huh7	Sample_02_285	SE_02_28500080	chrX	131613501	131668409	MBNL3
Huh7	Sample_02_285	SE_02_28500081	chr22	23858317	23882248	IGLL1
Huh7	Sample_02_285	SE_02_28500082	chr2	54757904	54821042	SPTBN1
Huh7	Sample_02_285	SE_02_28500083	chr10	80815533	80835084	LOC283050
Huh7	Sample_02_285	SE_02_28500084	chr3	186307052	186333858	AHSG
Huh7	Sample_02_285	SE_02_28500085	chr14	31721894	31736737	HECTD1
Huh7	Sample_02_285	SE_02_28500086	chr11	66699649	66745599	PC
Huh7	Sample_02_285	SE_02_28500087	chr10	114476126	114517306	MIR4295
Huh7	Sample_02_285	SE_02_28500088	chr1	17905646	17925364	ARHGEF10L
Huh7	Sample_02_285	SE_02_28500089	chr3	193846868	193860971	HES1
Huh7	Sample_02_285	SE_02_28500090	chr11	66110954	66122380	B3GNT1
Huh7	Sample_02_285	SE_02_28500091	chr3	30618909	30650617	TGFBR2
Huh7	Sample_02_285	SE_02_28500092	chr12	52344769	52372966	ACVR1B
Huh7	Sample_02_285	SE_02_28500093	chr3	32853814	32864139	TRIM71
Huh7	Sample_02_285	SE_02_28500094	chr19	45218942	45231951	CEACAM16
Huh7	Sample_02_285	SE_02_28500095	chr2	62789241	62807345	TMEM17
Huh7	Sample_02_285	SE_02_28500096	chr1	23879490	23896059	ID3
Huh7	Sample_02_285	SE_02_28500097	chr2	42272425	42289191	PKDCC
Huh7	Sample_02_285	SE_02_28500098	chr14	32669736	32673649	ARHGAP5
Huh7	Sample_02_285	SE_02_28500099	chr17	33376806	33417830	RFFL
Huh7	Sample_02_285	SE_02_28500100	chr1	8172664	8199306	ERRFI1
Huh7	Sample_02_285	SE_02_28500101	chr4	155497353	155540337	FGA
Huh7	Sample_02_285	SE_02_28500102	chr1	1364564	1374963	VWA1
Huh7	Sample_02_285	SE_02_28500103	chr20	2261709	2311510	TGM3
Huh7	Sample_02_285	SE_02_28500104	chr15	69108213	69114592	ANP32A
Huh7	Sample_02_285	SE_02_28500105	chr9	73025764	73037647	KLF9
Huh7	Sample_02_285	SE_02_28500106	chr18	3446164	3459790	TGIF1
Huh7	Sample_02_285	SE_02_28500107	chr7	47609605	47663798	TNS3
Huh7	Sample_02_285	SE_02_28500108	chr12	121414875	121423628	HNF1A
Huh7	Sample_02_285	SE_02_28500109	chr10	29598656	29620418	LYZL1
Huh7	Sample_02_285	SE_02_28500110	chr16	70435910	70476104	ST3GAL2
Huh7	Sample_02_285	SE_02_28500111	chr6	157932684	157961892	MIR3692
Huh7	Sample_02_285	SE_02_28500112	chr19	19204645	19213428	SLC25A42
Huh7	Sample_02_285	SE_02_28500113	chr14	31492816	31504264	STRN3
Huh7	Sample_02_285	SE_02_28500114	chr20	49343522	49381962	PARD6B
Huh7	Sample_02_285	SE_02_28500115	chr10	7740421	7760037	ITIH2
Huh7	Sample_02_285	SE_02_28500116	chr19	47609119	47618694	ZC3H4
Huh7	Sample_02_285	SE_02_28500117	chr3	124325836	124357126	KALRN
Huh7	Sample_02_285	SE_02_28500118	chr14	38051807	38066654	FOXA1
Huh7	Sample_02_285	SE_02_28500119	chr3	186978698	187010898	MASP1
Huh7	Sample_02_285	SE_02_28500120	chr11	57541492	57552918	CTNND1
Huh7	Sample_02_285	SE_02_28500121	chr17	79300063	79321267	TMEM105
Huh7	Sample_02_285	SE_02_28500122	chr12	50917610	50970080	DIP2B
Huh7	Sample_02_285	SE_02_28500123	chr1	156715109	156723224	HDGF
Huh7	Sample_02_285	SE_02_28500124	chrX	20378838	20430413	RPS6KA3
Huh7	Sample_02_285	SE_02_28500125	chr7	99594102	99621821	ZKSCAN1
Huh7	Sample_02_285	SE_02_28500126	chr11	113946378	113980118	ZBTB16
Huh7	Sample_02_285	SE_02_28500127	chr6	64269984	64284621	PTP4A1
Huh7	Sample_02_285	SE_02_28500128	chr11	65243652	65267363	MALAT1
Huh7	Sample_02_285	SE_02_28500129	chr17	48759774	48772859	ANKRD40
Huh7	Sample_02_285	SE_02_28500130	chr4	124317407	124341942	SPRY1
Huh7	Sample_02_285	SE_02_28500131	chr1	161186130	161197862	APOA2
Huh7	Sample_02_285	SE_02_28500132	chr2	46523347	46555823	EPAS1
Huh7	Sample_02_285	SE_02_28500133	chr2	99403036	99423691	MGAT4A
Huh7	Sample_02_285	SE_02_28500134	chr10	80721261	80735406	LOC283050
Huh7	Sample_02_285	SE_02_28500135	chr19	45425138	45431814	APOC1P1
Huh7	Sample_02_285	SE_02_28500136	chr9	132311267	132334222	C9orf50
Huh7	Sample_02_285	SE_02_28500137	chr7	25869058	25898650	MIR148A
Huh7	Sample_02_285	SE_02_28500138	chr17	53358988	53367563	HLF
Huh7	Sample_02_285	SE_02_28500139	chr20	5776920	5816919	C20orf196
Huh7	Sample_02_285	SE_02_28500140	chr1	145381941	145416146	HFE2
Huh7	Sample_02_285	SE_02_28500141	chr2	231900355	231918730	C2orf72
Huh7	Sample_02_285	SE_02_28500142	chr1	150940104	150952211	LASS2
Huh7	Sample_02_285	SE_02_28500143	chr19	17350014	17361497	NR2F6
Huh7	Sample_02_285	SE_02_28500144	chr12	125365233	125403376	UBC
Huh7	Sample_02_285	SE_02_28500145	chr1	43995869	44017370	PTPRF
Huh7	Sample_02_285	SE_02_28500146	chr19	923666	930410	ARID3A
Huh7	Sample_02_285	SE_02_28500147	chr15	75014769	75025913	CYP1A1
Huh7	Sample_02_285	SE_02_28500148	chr1	12667535	12680275	DHRS3
Huh7	Sample_02_285	SE_02_28500149	chr2	101393158	101411124	NPAS2
Huh7	Sample_02_285	SE_02_28500150	chr2	73246940	73264751	SFXN5
Huh7	Sample_02_285	SE_02_28500151	chr3	50231933	50266026	SLC38A3
Huh7	Sample_02_285	SE_02_28500152	chr2	42038991	42079573	LOC388942
Huh7	Sample_02_285	SE_02_28500153	chr14	103557182	103591320	C14orf73
Huh7	Sample_02_285	SE_02_28500154	chr17	43223982	43251095	HEXIM2
Huh7	Sample_02_285	SE_02_28500155	chr12	106511670	106534712	NUAK1
Huh7	Sample_02_285	SE_02_28500156	chr19	49463769	49471739	FTL
Huh7	Sample_02_285	SE_02_28500157	chr3	168574417	168589466	MECOM
Huh7	Sample_02_285	SE_02_28500158	chr2	165657832	165699873	COBLL1
Huh7	Sample_02_285	SE_02_28500159	chr1	27018183	27025158	ARID1A
Huh7	Sample_02_285	SE_02_28500160	chr1	225922677	225960871	SRP9
Huh7	Sample_02_285	SE_02_28500161	chr5	79476209	79528194	SERINC5
Huh7	Sample_02_285	SE_02_28500162	chr6	64209801	64234305	PTP4A1
Huh7	Sample_02_285	SE_02_28500163	chr9	93952756	93971955	LOC100129316
Huh7	Sample_02_285	SE_02_28500164	chr11	57404751	57410583	MIR130A
Huh7	Sample_02_285	SE_02_28500165	chr18	3592867	3626591	FLJ35776
Huh7	Sample_02_285	SE_02_28500166	chr12	122233390	122245372	LOC338799
Huh7	Sample_02_285	SE_02_28500167	chr4	1793906	1801759	FGFR3
Huh7	Sample_02_285	SE_02_28500168	chr11	34659626	34691816	EHF
Huh7	Sample_02_285	SE_02_28500169	chr21	46873091	46895498	COL18A1
Huh7	Sample_02_285	SE_02_28500170	chr4	124465812	124482606	LOC285419
Huh7	Sample_02_285	SE_02_28500171	chr8	142235382	142251952	SLC45A4
Huh7	Sample_02_285	SE_02_28500172	chr8	17642802	17664248	MTUS1
Huh7	Sample_02_285	SE_02_28500173	chr2	178127536	178132233	NFE2L2
Huh7	Sample_02_285	SE_02_28500174	chr5	133837032	133864369	PHF15
Huh7	Sample_02_285	SE_02_28500175	chr17	17584099	17616838	RAI1
Huh7	Sample_02_285	SE_02_28500176	chr2	228313692	228339040	AGFG1
Huh7	Sample_02_285	SE_02_28500177	chr1	20800583	20813979	CAMK2N1
Huh7	Sample_02_285	SE_02_28500178	chr11	65183296	65193225	NEAT1
Huh7	Sample_02_285	SE_02_28500179	chr11	67137120	67143828	CLCF1
Huh7	Sample_02_285	SE_02_28500180	chr7	29228688	29250162	CHN2
Huh7	Sample_02_285	SE_02_28500181	chr12	12866926	12880116	CDKN1B
Huh7	Sample_02_285	SE_02_28500182	chr11	70949929	70966418	SHANK2
Huh7	Sample_02_285	SE_02_28500183	chr20	19973467	19995282	NAA20
Huh7	Sample_02_285	SE_02_28500184	chr18	3028717	3063496	LPIN2
Huh7	Sample_02_285	SE_02_28500185	chr7	134570227	134597375	CALD1
Huh7	Sample_02_285	SE_02_28500186	chr19	780476	801563	PTBP1
Huh7	Sample_02_285	SE_02_28500187	chr1	154940739	154949362	SHC1
Huh7	Sample_02_285	SE_02_28500188	chr13	27530194	27559919	USP12
Huh7	Sample_02_285	SE_02_28500189	chr8	40008814	40035178	C8orf4
Huh7	Sample_02_285	SE_02_28500190	chr7	5592016	5610876	FSCN1
Huh7	Sample_02_285	SE_02_28500191	chr1	55324537	55356019	DHCR24
Huh7	Sample_02_285	SE_02_28500192	chr2	43558874	43618811	LOC100129726
Huh7	Sample_02_285	SE_02_28500193	chr12	24687564	24717810	SOX5
Huh7	Sample_02_285	SE_02_28500194	chr3	46623866	46629547	TDGF1
Huh7	Sample_02_285	SE_02_28500195	chr22	21126188	21151261	SERPIND1
Huh7	Sample_02_285	SE_02_28500196	chr10	35019106	35029729	PARD3
Huh7	Sample_02_285	SE_02_28500197	chr5	92912122	92922265	FLJ42709
Huh7	Sample_02_285	SE_02_28500198	chr7	23506734	23515321	IGF2BP3
Huh7	Sample_02_285	SE_02_28500199	chr3	177534292	177562050	TBL1XR1
Huh7	Sample_02_285	SE_02_28500200	chr22	50729990	50743625	PLXNB2
Huh7	Sample_02_285	SE_02_28500201	chr10	33594147	33627005	NRP1
Huh7	Sample_02_285	SE_02_28500202	chr8	124385933	124428828	ATAD2
Huh7	Sample_02_285	SE_02_28500203	chr9	123473913	123499635	MEGF9
Huh7	Sample_02_285	SE_02_28500204	chr3	24560706	24568117	THRB
Huh7	Sample_02_285	SE_02_28500205	chr18	46450159	46479958	SMAD7
Huh7	Sample_02_285	SE_02_28500206	chr10	54527693	54540399	MBL2
Huh7	Sample_02_285	SE_02_28500207	chr6	32934935	32941379	BRD2
Huh7	Sample_02_285	SE_02_28500208	chr10	4980242	5000941	AKR1C1
Huh7	Sample_02_285	SE_02_28500209	chr2	97522397	97536829	ANKRD39
Huh7	Sample_02_285	SE_02_28500210	chr7	40132336	40177203	C7orf11
Huh7	Sample_02_285	SE_02_28500211	chr3	127532016	127543774	MGLL
Huh7	Sample_02_285	SE_02_28500212	chr15	101972055	101988578	PCSK6
Huh7	Sample_02_285	SE_02_28500213	chr2	43444439	43456831	ZFP36L2
Huh7	Sample_02_285	SE_02_28500214	chr7	104650622	104656547	LOC100216545
Huh7	Sample_02_285	SE_02_28500215	chr16	88552103	88573578	ZFPM1
Huh7	Sample_02_285	SE_02_28500216	chr3	9436778	9445473	SETD5
Huh7	Sample_02_285	SE_02_28500217	chr17	73069479	73093864	SLC16A5
Huh7	Sample_02_285	SE_02_28500218	chr1	16469479	16484215	EPHA2
Huh7	Sample_02_285	SE_02_28500219	chr11	74861475	74881956	SLCO2B1
Huh7	Sample_02_285	SE_02_28500220	chr3	129340082	129348336	PLXND1
Huh7	Sample_02_285	SE_02_28500221	chr10	73092158	73109646	SLC29A3
Huh7	Sample_02_285	SE_02_28500222	chr14	62003285	62032126	HIF1A
Huh7	Sample_02_285	SE_02_28500223	chr2	208628113	208667133	FZD5
Huh7	Sample_02_285	SE_02_28500224	chr1	16158063	16177421	SPEN
Huh7	Sample_02_285	SE_02_28500225	chr12	56472315	56478426	ERBB3
Huh7	Sample_02_285	SE_02_28500226	chr18	42367723	42389201	SETBP1
Huh7	Sample_02_285	SE_02_28500227	chr5	36237720	36244134	C5orf33
Huh7	Sample_02_285	SE_02_28500228	chr2	21262671	21294878	APOB
Huh7	Sample_02_285	SE_02_28500229	chr11	9573193	9597906	WEE1
Huh7	Sample_02_285	SE_02_28500230	chr3	177050632	177080245	TBL1XR1
Huh7	Sample_02_285	SE_02_28500231	chr7	26238639	26243145	CBX3
Huh7	Sample_02_285	SE_02_28500232	chr17	56440383	56470601	SUPT4H1
Huh7	Sample_02_285	SE_02_28500233	chr22	50824426	50839395	PPP6R2
Huh7	Sample_02_285	SE_02_28500234	chr10	94448195	94460277	HHEX
Huh7	Sample_02_285	SE_02_28500235	chr7	1011359	1020075	COX19
Huh7	Sample_02_285	SE_02_28500236	chr10	30884387	30902509	LYZL2
Huh7	Sample_02_285	SE_02_28500237	chr8	37450618	37463394	ZNF703
Huh7	Sample_02_285	SE_02_28500238	chr22	29949069	29973545	THOC5
Huh7	Sample_02_285	SE_02_28500239	chr19	3395658	3416301	NFIC
Huh7	Sample_02_285	SE_02_28500240	chr20	17944679	17951314	SNX5
Huh7	Sample_02_285	SE_02_28500241	chr8	71313112	71318528	NCOA2
Huh7	Sample_02_285	SE_02_28500242	chr14	21148532	21157858	RNASE4
Huh7	Sample_02_285	SE_02_28500243	chr3	126241667	126250232	CHST13
Huh7	Sample_02_285	SE_02_28500244	chr19	45412841	45421704	APOC1
Huh7	Sample_02_285	SE_02_28500245	chr1	8074997	8101631	ERRFI1
Huh7	Sample_02_285	SE_02_28500246	chr3	148931033	148966977	CP
Huh7	Sample_02_285	SE_02_28500247	chrX	128249657	128281219	SMARCA1
Huh7	Sample_02_285	SE_02_28500248	chr3	120396350	120413237	HGD
Huh7	Sample_02_285	SE_02_28500249	chr2	20782182	20800466	HS1BP3
Huh7	Sample_02_285	SE_02_28500250	chr1	9968866	9995897	CTNNBIP1
Huh7	Sample_02_285	SE_02_28500251	chr17	28663363	28676524	TMIGD1
Huh7	Sample_02_285	SE_02_28500252	chr16	82066575	82098185	HSD17B2
Huh7	Sample_02_285	SE_02_28500253	chr1	1675286	1679122	SLC35E2
Huh7	Sample_02_285	SE_02_28500254	chr2	70311920	70316920	PCBP1
Huh7	Sample_02_285	SE_02_28500255	chr8	17750046	17771578	FGL1
Huh7	Sample_02_285	SE_02_28500256	chr17	75276610	75285634	2023-09-09
Huh7	Sample_02_285	SE_02_28500257	chr2	70334359	70370986	LOC100133985
Huh7	Sample_02_285	SE_02_28500258	chr7	130005912	130015522	CPA1
Huh7	Sample_02_285	SE_02_28500259	chr8	22212534	22228947	SLC39A14
Huh7	Sample_02_285	SE_02_28500260	chr2	216277580	216307838	FN1
Huh7	Sample_02_285	SE_02_28500261	chr19	39337587	39344330	HNRNPL
Huh7	Sample_02_285	SE_02_28500262	chr1	229264408	229269891	RAB4A
Huh7	Sample_02_285	SE_02_28500263	chr2	120181843	120197479	TMEM37
Huh7	Sample_02_285	SE_02_28500264	chr17	72422414	72451396	GPRC5C
Huh7	Sample_02_285	SE_02_28500265	chr5	154133125	154138194	LARP1
Huh7	Sample_02_285	SE_02_28500266	chr7	98685579	98698369	SMURF1
Huh7	Sample_02_285	SE_02_28500267	chr2	190383765	190421789	SLC40A1
Huh7	Sample_02_285	SE_02_28500268	chr17	29796540	29819003	MIR193A
Huh7	Sample_02_285	SE_02_28500269	chrX	39953065	39970032	BCOR
Huh7	Sample_02_285	SE_02_28500270	chr7	119690598	119701559	KCND2
Huh7	Sample_02_285	SE_02_28500271	chr22	29411837	29429263	C22orf31
Huh7	Sample_02_285	SE_02_28500272	chr6	31700988	31708676	CLIC1
Huh7	Sample_02_285	SE_02_28500273	chr17	26692967	26699348	VTN
Huh7	Sample_02_285	SE_02_28500274	chr3	133460572	133467876	TF
Huh7	Sample_02_285	SE_02_28500275	chr1	234850575	234863930	NCRNA00184
Huh7	Sample_02_285	SE_02_28500276	chr7	100763382	100771320	SERPINE1
Huh7	Sample_02_285	SE_02_28500277	chr16	69754842	69762825	NQO1
Huh7	Sample_02_285	SE_02_28500278	chr2	16078144	16085148	MYCNOS
Huh7	Sample_02_285	SE_02_28500279	chr8	103816736	103823325	AZIN1
Huh7	Sample_02_285	SE_02_28500280	chr1	8936382	8941960	ENO1
Huh7	Sample_02_285	SE_02_28500281	chr3	12687074	12706842	RAF1
Huh7	Sample_02_285	SE_02_28500282	chr3	171388676	171414386	PLD1
Huh7	Sample_02_285	SE_02_28500283	chrX	149435492	149443419	MIR2114
Huh7	Sample_02_285	SE_02_28500284	chr2	188391331	188416775	TFPI
Huh7	Sample_02_285	SE_02_28500285	chr9	136750064	136761343	VAV2
Huh7	Sample_02_285	SE_02_28500286	chr20	48802750	48811263	CEBPB
Huh7	Sample_02_285	SE_02_28500287	chr9	123527557	123547830	FBXW2
Huh7	Sample_02_285	SE_02_28500288	chr1	82265002	82270721	LPHN2
Huh7	Sample_02_285	SE_02_28500289	chr1	8212781	8251259	ERRFI1
Huh7	Sample_02_285	SE_02_28500290	chr10	45469373	45493513	C10orf10
Huh7	Sample_02_285	SE_02_28500291	chr8	17175342	17196232	VPS37A
Huh7	Sample_02_285	SE_02_28500292	chr11	10305840	10330419	SBF2
Huh7	Sample_02_285	SE_02_28500293	chr2	219259555	219267365	CTDSP1
Huh7	Sample_02_285	SE_02_28500294	chr11	46734857	46744049	F2
Huh7	Sample_02_285	SE_02_28500295	chr3	171756331	171761593	FNDC3B
Huh7	Sample_02_285	SE_02_28500296	chr9	75592323	75613130	ALDH1A1
Huh7	Sample_02_285	SE_02_28500297	chr11	118064227	118086398	AMICA1
Huh7	Sample_02_285	SE_02_28500298	chr17	13311834	13343701	HS3ST3A1
Huh7	Sample_02_285	SE_02_28500299	chr7	150051040	150077607	REPIN1
Huh7	Sample_02_285	SE_02_28500300	chr19	40926375	40951403	SERTAD1
Huh7	Sample_02_285	SE_02_28500301	chr10	112134668	112187435	SMNDC1
Huh7	Sample_02_285	SE_02_28500302	chr5	52759295	52780074	FST
Huh7	Sample_02_285	SE_02_28500303	chr3	172258725	172283702	TNFSF10
Huh7	Sample_02_285	SE_02_28500304	chr1	1622011	1625705	SLC35E2B
Huh7	Sample_02_285	SE_02_28500305	chr11	116695868	116710290	APOC3
Huh7	Sample_02_285	SE_02_28500306	chr16	85585904	85592497	KIAA0182
Huh7	Sample_02_285	SE_02_28500307	chr17	27262372	27280197	PHF12
Huh7	Sample_02_285	SE_02_28500308	chr13	32608390	32656105	FRY
Huh7	Sample_02_285	SE_02_28500309	chr17	16187977	16203849	MIR1288
Huh7	Sample_02_285	SE_02_28500310	chr17	41618468	41637712	ETV4
Huh7	Sample_02_285	SE_02_28500311	chr2	174827331	174832503	SP3
Huh7	Sample_02_285	SE_02_28500312	chr3	176912454	176932075	TBL1XR1
Huh7	Sample_02_285	SE_02_28500313	chr5	40778677	40803727	PRKAA1
Huh7	Sample_02_285	SE_02_28500314	chr1	155096636	155103551	EFNA1
Huh7	Sample_02_285	SE_02_28500315	chr7	143076866	143094736	ZYX
Huh7	Sample_02_285	SE_02_28500316	chr4	40189352	40197531	RHOH
Huh7	Sample_02_285	SE_02_28500317	chr1	24329276	24351231	SRSF10
Huh7	Sample_02_285	SE_02_28500318	chr3	32820961	32840570	TRIM71
Huh7	Sample_02_285	SE_02_28500319	chr11	22687120	22711301	GAS2
Huh7	Sample_02_285	SE_02_28500320	chr5	176511949	176518238	FGFR4
Huh7	Sample_02_285	SE_02_28500321	chr5	139075242	139091450	CXXC5
Huh7	Sample_02_285	SE_02_28500322	chr12	100855981	100877622	NR1H4
Huh7	Sample_02_285	SE_02_28500323	chr5	173357886	173401035	C5orf47
Huh7	Sample_02_285	SE_02_28500324	chr12	6442839	6452330	TNFRSF1A
Huh7	Sample_02_285	SE_02_28500325	chr2	8258092	8280982	LOC339788
Huh7	Sample_02_285	SE_02_28500326	chr15	102065190	102071732	PCSK6
Huh7	Sample_02_285	SE_02_28500327	chr16	28534536	28554901	NUPR1
Huh7	Sample_02_285	SE_02_28500328	chr6	52588141	52617892	GSTA7P
Huh7	Sample_02_285	SE_02_28500329	chr10	102819636	102827931	KAZALD1
Huh7	Sample_02_285	SE_02_28500330	chr1	61578835	61623976	NFIA
Huh7	Sample_02_285	SE_02_28500331	chr6	119467344	119497260	FAM184A
Huh7	Sample_02_285	SE_02_28500332	chr20	32886878	32901250	AHCY
Huh7	Sample_02_285	SE_02_28500333	chr6	3355313	3384636	SLC22A23
Huh7	Sample_02_285	SE_02_28500334	chr1	228961464	228976119	RHOU
Huh7	Sample_02_285	SE_02_28500335	chr15	63537047	63557735	APH1B
Huh7	Sample_02_285	SE_02_28500336	chr1	117006955	117021193	ATP1A1OS
Huh7	Sample_02_285	SE_02_28500337	chr18	74188220	74209074	ZNF516
Huh7	Sample_02_285	SE_02_28500338	chr11	62993389	63020556	SLC22A25
Huh7	Sample_02_285	SE_02_28500339	chr17	55914709	55935241	MRPS23
Huh7	Sample_02_285	SE_02_28500340	chr13	34212450	34224453	RFC3
Huh7	Sample_02_285	SE_02_28500341	chr22	38572753	38592571	PLA2G6
Huh7	Sample_02_285	SE_02_28500342	chr19	4050231	4067958	ZBTB7A
Huh7	Sample_02_285	SE_02_28500343	chr1	6660229	6676002	KLHL21
Huh7	Sample_02_285	SE_02_28500344	chr19	38420820	38435387	SIPA1L3
Huh7	Sample_02_285	SE_02_28500345	chr4	38663905	38677413	FLJ13197
Huh7	Sample_02_285	SE_02_28500346	chr5	148520766	148536007	ABLIM3
Huh7	Sample_02_285	SE_02_28500347	chr15	53076075	53084386	ONECUT1
Huh7	Sample_02_285	SE_02_28500348	chr11	76476920	76496331	TSKU
Huh7	Sample_02_285	SE_02_28500349	chr21	46726406	46754202	LOC642852
Huh7	Sample_02_285	SE_02_28500350	chr19	39181837	39196629	CAPN12
Huh7	Sample_02_285	SE_02_28500351	chr6	43878412	43896601	LOC100132354
Huh7	Sample_02_285	SE_02_28500352	chr20	30146786	30163085	PSIMCT-1
Huh7	Sample_02_285	SE_02_28500353	chr22	36745566	36761820	MYH9
Huh7	Sample_02_285	SE_02_28500354	chr4	141071077	141076265	MAML3
Huh7	Sample_02_285	SE_02_28500355	chr4	39410639	39433586	KLB
Huh7	Sample_02_285	SE_02_28500356	chr11	61581319	61585977	FADS1
Huh7	Sample_02_285	SE_02_28500357	chr17	1897091	1904439	RTN4RL1
Huh7	Sample_02_285	SE_02_28500358	chr1	200333109	200350745	ZNF281
Huh7	Sample_02_285	SE_02_28500359	chr3	24487587	24496168	THRB
Huh7	Sample_02_285	SE_02_28500360	chr17	79359825	79376170	BAHCC1
Huh7	Sample_02_285	SE_02_28500361	chr11	61519147	61538486	DKFZP434K028
Huh7	Sample_02_285	SE_02_28500362	chr5	154213787	154240573	C5orf4
Huh7	Sample_02_285	SE_02_28500363	chr8	39891904	39915030	C8orf4
Huh7	Sample_02_285	SE_02_28500364	chr20	33289618	33298580	TP53INP2
Huh7	Sample_02_285	SE_02_28500365	chr3	186755663	186768917	ST6GAL1
Huh7	Sample_02_285	SE_02_28500366	chr3	31572343	31576047	STT3B
Huh7	Sample_02_285	SE_02_28500367	chr14	69248740	69263617	ZFP36L1
Huh7	Sample_02_285	SE_02_28500368	chr8	97597703	97606039	PGCP
Huh7	Sample_02_285	SE_02_28500369	chr1	16968839	16986210	MST1P2
Huh7	Sample_02_285	SE_02_28500370	chr15	70483112	70493458	TLE3
Huh7	Sample_02_285	SE_02_28500371	chr3	170715360	170734570	SLC2A2
Huh7	Sample_02_285	SE_02_28500372	chr7	47801131	47827852	C7orf69
Huh7	Sample_02_285	SE_02_28500373	chr10	5110524	5117936	AKR1C3
Huh7	Sample_02_285	SE_02_28500374	chr21	43130345	43140266	C21orf129
Huh7	Sample_02_285	SE_02_28500375	chr12	57531212	57546278	LRP1
Huh7	Sample_02_285	SE_02_28500376	chr3	49495872	49509957	DAG1
Huh7	Sample_02_285	SE_02_28500377	chr17	38269290	38281186	MSL1
Huh7	Sample_02_285	SE_02_28500378	chr1	11898606	11905209	NPPA
Huh7	Sample_02_285	SE_02_28500379	chr11	129867771	129874351	NCRNA00167
Huh7	Sample_02_285	SE_02_28500380	chr3	171521808	171530236	PLD1
Huh7	Sample_02_285	SE_02_28500381	chr19	42754278	42760827	ERF
Huh7	Sample_02_285	SE_02_28500382	chr12	122883527	122908580	CLIP1
Huh7	Sample_02_285	SE_02_28500383	chr22	41839744	41851410	TOB2
Huh7	Sample_02_285	SE_02_28500384	chr1	32402551	32422555	PTP4A2
Huh7	Sample_02_285	SE_02_28500385	chr20	52257118	52279677	ZNF217
Huh7	Sample_02_285	SE_02_28500386	chr14	35014619	35026901	EAPP
Huh7	Sample_02_285	SE_02_28500387	chr9	672677	707600	KANK1
Huh7	Sample_02_285	SE_02_28500388	chr3	5018213	5022828	BHLHE40
Huh7	Sample_02_285	SE_02_28500389	chr2	157188003	157200393	NR4A2
Huh7	Sample_02_285	SE_02_28500390	chr2	235888669	235915808	SH3BP4
Huh7	Sample_02_285	SE_02_28500391	chr8	27451696	27473474	CLU
Huh7	Sample_02_285	SE_02_28500392	chr12	69722295	69736847	LYZ
Huh7	Sample_02_285	SE_02_28500393	chr3	13297870	13308968	NUP210
Huh7	Sample_02_285	SE_02_28500394	chr19	41768217	41773048	HNRNPUL1
Huh7	Sample_02_285	SE_02_28500395	chrX	152887000	152915045	DUSP9
Huh7	Sample_02_285	SE_02_28500396	chr19	42982975	43003744	CEACAM1
Huh7	Sample_02_285	SE_02_28500397	chr7	55132582	55150227	EGFR
Huh7	Sample_02_285	SE_02_28500398	chr20	61541492	61559130	DIDO1
Huh7	Sample_02_285	SE_02_28500399	chr3	124548048	124559288	ITGB5
Huh7	Sample_02_285	SE_02_28500400	chr1	44865923	44875637	RNF220
Huh7	Sample_02_285	SE_02_28500401	chr3	12261897	12267876	TIMP4
Huh7	Sample_02_285	SE_02_28500402	chr15	60665969	60695698	ANXA2
Huh7	Sample_02_285	SE_02_28500403	chr17	27502677	27508121	MYO18A
Huh7	Sample_02_285	SE_02_28500404	chr1	27235632	27250251	NR0B2
Huh7	Sample_02_285	SE_02_28500405	chr12	46764586	46779739	SLC38A2
Huh7	Sample_02_285	SE_02_28500406	chr19	45295390	45327846	BCAM
Huh7	Sample_02_285	SE_02_28500407	chr2	62682996	62698444	TMEM17
Huh7	Sample_02_285	SE_02_28500408	chr1	200263061	200286590	FAM58B
Huh7	Sample_02_285	SE_02_28500409	chr1	182257108	182290363	GLUL
Huh7	Sample_02_285	SE_02_28500410	chr14	56038580	56069879	KTN1
Huh7	Sample_02_285	SE_02_28500411	chr17	80052698	80065192	FASN
Huh7	Sample_02_285	SE_02_28500412	chr11	35186121	35215255	CD44
Huh7	Sample_02_285	SE_02_28500413	chr10	105548953	105572800	SH3PXD2A
Huh7	Sample_02_285	SE_02_28500414	chr15	53724804	53750932	WDR72
Huh7	Sample_02_285	SE_02_28500415	chr4	140753165	140780633	MGST2
Huh7	Sample_02_285	SE_02_28500416	chr1	53628002	53651616	CPT2
Huh7	Sample_02_285	SE_02_28500417	chr7	5551885	5574103	ACTB
Huh7	Sample_02_285	SE_02_28500418	chr19	1093360	1106055	GPX4
Huh7	Sample_02_285	SE_02_28500419	chr6	1310629	1337258	FOXQ1
Huh7	Sample_02_285	SE_02_28500420	chr20	10408413	10416695	MKKS
Huh7	Sample_02_285	SE_02_28500421	chr20	34328206	34332847	RBM39
Huh7	Sample_02_285	SE_02_28500422	chr6	43768859	43776612	VEGFA
Huh7	Sample_02_285	SE_02_28500423	chr7	116426277	116454318	CAPZA2
Huh7	Sample_02_285	SE_02_28500424	chr7	2839932	2875736	GNA12
Huh7	Sample_02_285	SE_02_28500425	chr2	208683581	208714532	FZD5
Huh7	Sample_02_285	SE_02_28500426	chr10	102129607	102135718	NCRNA00263
Huh7	Sample_02_285	SE_02_28500427	chr2	101849834	101871416	C2orf29
Huh7	Sample_02_285	SE_02_28500428	chr6	114175403	114195014	MARCKS
Huh7	Sample_02_285	SE_02_28500429	chr8	126440603	126448905	TRIB1
Huh7	Sample_02_285	SE_02_28500430	chr4	159734567	159755753	FNIP2
Huh7	Sample_02_285	SE_02_28500431	chr1	156083683	156100908	LMNA
Huh7	Sample_02_285	SE_02_28500432	chr1	94762967	94793346	ARHGAP29
Huh7	Sample_02_285	SE_02_28500433	chr19	516563	534370	CDC34
Huh7	Sample_02_285	SE_02_28500434	chr17	7736761	7748880	KDM6B
Huh7	Sample_02_285	SE_02_28500435	chr8	11558635	11579550	GATA4
Huh7	Sample_02_285	SE_02_28500436	chr10	34498907	34513940	PARD3
Huh7	Sample_02_285	SE_02_28500437	chr17	41525709	41562566	DHX8
Huh7	Sample_02_285	SE_02_28500438	chr10	35102172	35106031	PARD3
Huh7	Sample_02_285	SE_02_28500439	chr17	17737160	17745630	SREBF1
Huh7	Sample_02_285	SE_02_28500440	chr19	39308151	39324307	ECH1
Huh7	Sample_02_285	SE_02_28500441	chr7	100410133	100431402	EPHB4
Huh7	Sample_02_285	SE_02_28500442	chr20	2081554	2085271	STK35
Huh7	Sample_02_285	SE_02_28500443	chr3	48466440	48474782	PLXNB1
Huh7	Sample_02_285	SE_02_28500444	chr8	102574759	102601875	GRHL2
Huh7	Sample_02_285	SE_02_28500445	chr1	221882223	221893763	DUSP10
Huh7	Sample_02_285	SE_02_28500446	chr19	18484208	18499900	GDF15
Huh7	Sample_02_285	SE_02_28500447	chr16	81477340	81492616	CMIP
Huh7	Sample_02_285	SE_02_28500448	chr3	193786806	193832167	HES1
Huh7	Sample_02_285	SE_02_28500449	chr9	19125749	19174473	PLIN2
Huh7	Sample_02_285	SE_02_28500450	chr10	21812302	21817530	C10orf140
Huh7	Sample_02_285	SE_02_28500451	chr12	53762976	53775896	SP1

## Sheet: upregulated SE-related genes
Table S3 upregulated SE-related genes
upregulated SE-related genes	log2FoldChange
CYP24A1	1.8045
TCP10L2	1.23539
RNF43	1.0693
ASPSCR1	1.21375
ETV4	3.02051
MSH5	2.22921
STK39	2.01815
ANXA2	1.18158
IRX3	2.51362
OLIG3	2.93413
SCN1A	2.06913
NKD1	3.87513
CHKA	1.12627
TRIM71	8.6344
TBC1D16	1.70927
GLUL	2.03815
C2orf82	1.44484
MIMT1	1.94732
FOXQ1	1.53571
GPC3	5.95026
KCNQ1OT1	1.21517
EGLN3	1.44548
KAAG1	1.77539
DUOX2	3.20786
SPIRE2	1.2994
ATAD2	1.70972
KCNK9	6.47704
HS3ST5	2.35456
EHF	1.4725
RTKN2	2.8623
CPLX2	9.08307
SLC7A6	1.82186
RASGRF1	2.59104
ROBO1	2.89597
ARHGEF16	1.04222
UPK3A	5.73149
C9orf50	1.57759
MEG3	1.18509
CUEDC1	1.04912
SEMA7A	1.34734
MYBPC1	2.93056
RASEF	1.13344
CCL20	1.35205
PEG10	4.59855
ITGA2	1.96203
GLS	1.08422
AXIN2	1.97962
SEMA3B	1.54447
LYZ	2.18687
ACSL6	1.34014
BCAT1	1.45176
BMP4	1.70962
ADRA2C	3.33295
SERPINE2	1.20409
TRNP1	1.78449
IGF2BP1	7.03195
SH2D4B	2.77104
FGF19	2.65523
SQSTM1	1.07608
CEACAM16	1.21698
PKDCC	1.29628
TGM3	5.37256
ARID3A	2.52982
MECOM	1.16403
SLC45A4	2.00568
TDGF1	2.46639
IGF2BP3	4.7894
LYZL2	1.81247
ZNF703	1.34847
TMIGD1	2.17832
CPA1	2.99111
NQO1	4.81989
MYCNOS	2.92445
NUPR1	1.07261
KAZALD1	1.77428
RFC3	1.05187
PLA2G6	1.33173
SIPA1L3	1.18225
CAPN12	1.54252
AKR1C3	1.60862
DUSP9	5.05039
BCAM	1.0194
